# Supplementary material for: Additive and Dominant Loci Jointly Pyramiding the Grain Quality of Hybrid Rice
Source: Research Square preprint supplement (doi:10.21203/rs.3.rs-1565349/v1), 2022-04-18
Supplement: Supplementary file 1 [file 4fae9e40cd8dbe9902cf2732.xlsx]

## Sheet: Table S1
ID	Name	Parent
V1	Aizizhan	Male
V2	Dongqiubo	Male
V3	Guangqiuai	Male
V4	Guangchangai3784	Male
V5	Qingfengai	Male
V6	Jiangerai	Male
V7	Qingerai	Male
V8	Jiduilun	Male
V9	Kuoyedao	Male
V10	Yeqinglun	Male
V11	Lucaihao	Male
V12	Huanan15	Male
V13	Guangchangai4182	Male
V14	Guiyangai49	Male
V15	Chaoyangzao18	Male
V16	Guichao2hao	Male
V17	Guangchang13	Male
V18	Fengqingai	Male
V19	Qingnongai	Male
V20	Fengaizhan1hao	Male
V21	Huanghuazhan	Male
V22	Huangxinzhan	Male
V23	28zhan	Male
V24	Fenghuazhan	Male
V25	Qingliuai	Male
V26	Fengbazhan	Male
V27	Changsizhan	Male
V28	Huasizhan	Male
V29	Yangdao2hao	Male
V30	Yangdao6hao	Male
V31	Teqing	Male
V32	Sadu-cho	Male
V33	Shan-Huang Zhan	Male
V34	IR64	Male
V35	N22	Male
V36	Aijiaonante	Male
V37	Guangluai4hao	Male
V38	Xiangaizao10hao	Male
V39	Qingsiai16B	Male
V40	Dianrui409B	Male
V41	88B	Male
V42	Xianghui91269	Male
V43	Lucaihao	Male
V44	Shufeng101	Male
V45	Chengdouai3hao	Male
V46	Sankecun	Male
V47	Jiabala	Male
V48	Taishannuo	Male
V49	Guichao2hao	Male
V50	Huke3hao	Male
V51	Teqingxuanhui	Male
V52	Huangsiguizhan	Male
V53	Xiangwanxian3hao	Male
V54	Jinyou1hao	Male
V55	Chengnongshuijing	Male
V56	Momi	Male
V57	Sanbaili	Male
V58	Liusha1hao	Male
V59	Dongtingwanshan	Male
V60	Yangdao2hao	Male
V61	60zao	Male
V62	Taozhongxianxuan2	Male
V63	Nantehao	Male
V64	Heidou4hao	Male
V65	Jinnante43B	Male
V66	Xiangzaoxian7hao	Male
V67	80B	Male
V68	Baoxie123B	Male
V69	Jiangnongzao1hao	Male
V70	Gu154	Male
V71	XiangaiB	Male
V72	Aituogu151	Male
V73	Meijiading2	Male
V74	Jiefangxian	Male
V75	Baikehualuo	Male
V76	Liuyezhan	Male
V77	Zhenshan97	Male
V78	Minghui63	Male
V79	9311	Male
V80	Nanjing11	Male
V81	IRAT109	Male
V82	Huajingxian74	Male
V84	Varylava	Male
V83	Zihui100	Male
V85	D62B	Male
V86	G46B	Male
V87	IR58025B	Male
V88	Zhong9B	Male
V89	Xiang5	Male
V90	Meijiagao2	Male
V91	Exiang1hao	Male
V92	Q198	Male
V93	Huangxiuzhan	Male
V94	Shuhui527	Male
V95	Shuhui288	Male
V96	Shuhui707	Male
V97	Longhui11	Male
V98	Nanhui511	Male
V99	Xianghui529	Male
V100	Jinhui275	Male
V101	Luhui5240	Male
V102	Minghui2088	Male
V103	Shanhui287	Male
V104	Shanhui8281	Male
V105	R238	Male
V106	R727	Male
V107	205R	Male
V108	781R	Male
V109	3301R	Male
V110	IR24	Male
V111	IR1544	Male
V112	Gui630	Male
V113	Fu36-2	Male
V114	R1318	Male
V115	93-11	Male
V116	AS(XinanS)	Female
V117	3A(Luohong3A)	Female
V118	Y58S(Y58S)	Female
V119	GZ63(Guangzhan63S)	Female
V120	PA64(Pei’ai64S)	Female

## Sheet: Table S2(V)
taxa	AC	ASV	BRR	CD	GL	GLWR	GW	HRR	MRR	PC	PGWC	TD
V1	22.7305	2.325	78.1977	78.025	5.504	2.2395	2.4655	41.3111	67.1469	9.84097	100	3
V4	24.7365	2.35	78.5431	71.98	5.291	2.2365	2.3725	45.9112	66.4009	10.0146	100	3.5
V5	24.35	2.2	75.4773	57.16	5.2905	1.992	2.662	49.532	65.7806	8.32877	98.74	5
V6	25.1035	2.45	79.0606	59.355	5.3765	2.119	2.5465	55.6508	67.346	9.95018	98.71	4.5
V7	10.1705	2	73.5644	38.625	6.549	3.421	1.919	53.5216	65.7706	10.5469	86.54	3
V8	23.526	2.35	77.1412	80.1	5.4975	2.17	2.542	33.1691	64.066	8.71031	99.34	3
V9	26.0545	2.1	80.7972	66.995	5.352	2.1635	2.4765	53.358	67.3719	7.98719	99.74	5
V10	12.1755	2.45	78.9796	6.225	5.0685	2.118	2.3955	62.2243	69.5484	8.58485	24.32	3
V11	22.7425	2.9	74.6142	77.25	4.946	1.904	2.606	55.5054	63.815	9.4413	99.265	3
V12	24.478	2.55	77.0224	9.24	6.411	3.197	2.013	47.879	66.7991	8.35225	28.28	2
V13	25.5475	2	75.6557	58.145	5.5205	2.574	2.1485	53.3328	66.0203	7.64803	92.455	3
V14	23.254	4.375	73.6417	4.81	5.092	2.246	2.273	56.9269	68.3715	8.83979	14.29	3
V15	24.2015	2	79.6017	67.04	5.546	2.4975	2.223	53.3261	69.2036	7.63959	99.705	4.5
V16	25.0415	3.85	80.3879	57.47	5.445	2.3915	2.281	60.9681	69.1257	8.79591	99.04	5
V17	23.744	2.425	75.7863	73.835	5.449	2.434	2.247	44.0905	65.5514	7.94691	97.77	3
V18	24.0115	3.85	79.4168	34.04	5.4885	2.686	2.049	59.8011	67.9635	8.10416	70.62	4
V19	22.7586	3.39258	79.036	18.6832	5.72837	3.10383	1.87813	59.8055	67.9633	7.84833	45.9489	3.48148
V20	19.8957	2.53516	78.0515	8.44688	6.10955	3.57508	1.72951	59.8077	67.9627	7.37322	24.05	2.51852
V21	16.766	2.05	76.6997	4.725	6.3085	3.799	1.666	59.8083	67.9614	7.11739	14.6	2
V22	13.573	2.025	74.1245	16.37	5.86	3.4955	1.6825	39.2996	66.9261	9.51275	44.55	4
V23	14.682	2.125	76.818	22.8	6.559	3.4835	1.8885	36.9376	66.6026	7.6525	60.565	3.5
V24	14.9255	2	76.6073	5.715	5.995	3.339	1.801	61.794	67.0575	7.15	22.115	4
V25	26.9765	3.4	79.5671	14.475	5.581	2.681	2.0885	67.3905	68.9623	7.01948	36.99	2.5
V26	12.491	2	75.1502	3.775	6.0735	3.3775	1.803	39.7624	68.7883	9.63578	11.845	4
V27	13.2285	2.35	76.725	16.975	6.5245	3.2695	2.0025	29.3891	68.6393	7.1213	52.39	4
V28	13.082	2.375	75.7824	9.96	5.389	2.996	1.802	59.9657	66.4027	6.98414	28.375	2
V29	18.027	2.15	76.087	19.535	6.006	2.707	2.2225	52.9709	67.394	6.68387	53.625	4
V30	16.435	2.175	78.0637	7.01	6.7635	3.2125	2.1105	57.7022	67.1979	8.32851	26.265	4
V31	25.676	2.675	80.432	61.51	5.38	2.207	2.4435	62.0436	67.5807	7.63108	99.66	5
V32	25.6625	2.025	76.4842	75.15	5.5385	2.5395	2.1925	34.3926	62.6515	8.5646	92.59	2.5
V33	25.166	3.7	77.3672	1.095	5.426	3.145	1.731	62.6406	67.2891	8.26389	2.11	2
V34	18.822	2.2	79.7216	20.77	6.768	3.5565	1.9085	66.8003	68.3899	8.30952	65.995	3
V35	20.0189	2.40741	79.0474	43.1881	6.285	3.12069	2.18109	65.6923	67.5345	8.96084	84.496	3
V36	22.4919	2.79259	77.7952	64.979	5.388	2.31131	2.4796	63.6348	65.946	10.0917	96.0264	3
V37	24.5645	3	77.121	74.77	4.905	1.8755	2.62	62.5268	65.0906	10.6929	100	3
V38	25.6375	2	80.5107	57.495	5.548	2.515	2.2105	62.5978	69.8791	5.97607	93.17	4.5
V39	19.502	2.05	78.6974	60.325	5.593	2.576	2.1755	59.5663	69.0346	7.58582	97.655	2
V40	21.868	2.15	78.3044	61.18	6.143	3.055	2.0155	55.2247	65.6811	7.76289	93.8	2
V41	13.78	2.225	76.7134	39.685	6.389	3.0545	2.098	35.8127	65.3638	6.33963	94.15	3
V42	11.701	2.225	77.2727	55.24	6.308	3.126	2.026	51.1364	62.5	11.2944	78.72	2
V43	16.9965	2.3375	77.1434	43.2925	6.17973	3.05468	2.04316	57.7305	63.4698	9.7682	73.4487	2.16346
V44	23.382	2.45	77.014	31.345	5.9525	2.8615	2.0955	60.5103	64.4396	8.10678	71.365	2.5
V45	24.834	2.4	77.7563	76.36	5.241	2.1135	2.4855	37.2107	61.2222	7.94423	99.695	3
V46	19.52	2.15	75.3933	77.44	6.3245	3.163	2.007	59.5689	66.0121	8.14232	98.115	2
V47	23.0875	2.325	78.7812	72.255	5.2315	2.1685	2.416	38.1199	65.8141	7.76449	100	4
V48	2.967	2.1	75.3424	84.695	5.2815	2.186	2.4215	13.8955	65.5568	8.26402	100	2
V49	25.765	3	81.0296	46.44	5.1475	1.998	2.5805	55.5355	68.3743	8.5705	98.975	4.5
V50	26.051	2.225	76.818	75.3	5.5195	2.198	2.514	29.2728	63.8521	8.01618	97.82	3
V51	24.877	2.275	75.5462	60.22	5.7235	2.289	2.506	43.7838	64.8973	8.39866	97.685	3.5
V52	26.1465	3.05	77.0425	24.635	5.372	3.0515	1.7655	52.9145	65.9551	8.88726	59.815	3
V53	13.779	2	73.623	10.98	6.578	3.865	1.71	59.8416	64.1822	7.6145	35.7	3
V54	25.101	2	79.1829	57.3	6.2205	2.807	2.2215	34.8249	64.2023	7.77625	93.175	2
V55	22.418	2	76.6104	51.2	6.259	3.1665	1.9825	47.7581	64.5246	7.47317	93.77	3
V56	23.939	4.15	73.8372	70.78	7.007	3.279	2.1475	54.4574	62.7907	6.91575	100	2
V57	26.1685	2.45	79.3307	31.88	6.7625	3.39	1.999	48.0315	68.3071	6.16164	73.71	3
V58	22.5675	2.35	78.1832	63.29	5.32	2.261	2.3565	54.767	70.9147	10.0715	100	4.5
V59	24.0515	2.075	77.9545	21.5	5.79	2.84	2.0435	61.6102	68.905	7.15052	60.79	4
V60	22.595	2.1	77.0588	14.54	6.5135	3.0235	2.16	60	67.0588	7.83308	44.895	2.5
V61	11.119	2.2	73.7235	27.75	6.4955	3.435	1.8965	47.8393	63.921	7.80968	73.065	4
V62	17.6979	2.4582	74.6107	50.3125	6.0431	2.8674	2.13525	37.5638	62.8343	8.24486	88.7764	3.5
V63	24.6885	2.65	76.3566	65.27	5.441	2.298	2.374	32.1705	62.4031	8.68004	95.95	3
V64	25.172	2.25	78.6279	58.68	5.186	2.296	2.264	51.9593	66.4708	7.20169	91.37	4.5
V65	23.156	2.15	77.2374	53.72	5.533	2.8065	1.9785	46.6926	65.3696	10.2089	93.95	3
V66	21.581	2.05	75.5917	57.22	5.571	2.842	1.967	38.1896	67.1247	10.8429	92.575	2
V67	10.311	2.1	73.3286	53.55	5.9815	3.047	1.9685	31.1861	63.5333	8.95549	89.035	2
V68	11.393	2.35	74.5573	67.505	5.8755	2.6875	2.191	34.322	62.5253	8.54339	94.49	2
V69	22.6795	2.9	75.7307	63.015	5.769	2.484	2.332	45.9956	64.5769	9.40269	100	3
V70	13.1285	2.4	78.8771	10.54	6.0965	3.185	1.918	65.755	68.8975	7.61956	35.185	3
V71	21.076	2.925	75.5454	68.74	5.7915	2.4655	2.3575	56.4622	63.8162	9.7646	98.92	4.5
V72	25.509	2.05	78.3052	36.565	4.8665	1.9475	2.5045	51.087	66.0772	7.03895	74.32	3.5
V73	24.3605	3.425	78.6561	33.03	5.8605	2.5805	2.2745	64.6245	69.17	5.40193	54.595	3
V74	25.9255	2.725	76.4826	79.04	5.7055	2.2965	2.4935	58.099	62.4531	7.16324	100	3
V75	22.9435	2.6	73.3707	69	5.7	2.471	2.3165	48.9216	62.5303	9.32337	100	3.5
V76	19.095	2.3	77.9576	49.245	6.1985	2.904	2.1415	48.2205	65.3615	8.96572	84.71	3
V77	18.6538	2.11333	77.2131	47.7986	6.22615	2.91358	2.14425	48.361	64.9373	8.39675	85.2	3
V78	18.2355	2.025	76.4687	46.28	6.2535	2.923	2.147	48.8235	64.5131	8.0277	85.69	3
V79	15.611	2.85	77.6436	4.47	6.6815	3.1985	2.094	55.884	67.2536	8.9303	16.14	4
V80	24.241	5.9	77.7356	17.205	5.6275	2.537	2.224	26.762	67.3816	9.8593	66.72	3.5
V81	11.9885	2.45	77.2206	61.65	5.8785	2.218	2.6655	57.2085	66.1403	8.39154	97.595	4.5
V82	25.796	4.6	77.49	23.18	5.6305	2.8825	1.959	61.1554	68.9243	8.15435	65.25	4
V83	23.06	2.175	77.2304	30.07	5.9485	2.643	2.2535	58.2204	67.327	7.21889	73.46	3.5
V84	24.1775	2.15551	77.6547	32.2551	5.9852	2.87025	2.09775	58.5454	66.1123	7.58516	75.3633	3.5
V85	25.295	2.15	78.3629	34.82	5.997	3.0975	1.942	58.8704	65.4973	8.14936	77.28	3.5
V86	23.8185	2.5	78.9317	50.525	5.4145	2.157	2.517	53.1431	66.3455	8.50301	85.79	5
V87	13.0925	2.325	80.1186	43.845	5.9705	3.813	1.57	48.9238	65.6977	8.59011	83.095	2
V88	25.6355	2.15	77.5126	32.885	6.0545	3.394	1.7905	58.1969	65.6849	8.85988	74.08	3
V89	19.3945	2.3	79.1801	3.62	6.555	3.167	2.0745	61.2893	67.1292	7.05455	14.035	1.5
V90	25.932	2.925	76.1446	26.1	5.093	2.1865	2.348	63.4209	66.2026	7.34755	76.41	3
V91	13.8095	2.175	76.8593	13.635	6.9465	3.524	1.9755	54.5076	65.8788	7.66979	32.27	3
V92	14.249	2.075	78.7803	6.78	6.7395	3.2305	2.0925	62.2765	66.7987	8.03632	22.375	4
V93	13.5445	2.025	76.7597	6.48	6.335	3.6	1.7635	44.7295	66.7994	8.03919	20.905	3
V94	13.4775	2.1	77.2101	31.25	6.952	3.3055	2.1095	38.8969	66.4042	7.12493	76.57	3
V95	14.0255	2.05	78.5156	20.945	7.1345	3.185	2.2455	39.0625	66.9922	7.21351	51.77	2.5
V96	13.1385	2.125	75.1957	32.25	6.9875	3.2325	2.1675	53.3234	64.062	6.95525	74.68	3
V97	12.6255	2.15	76.1244	19.665	7.0005	3.5225	1.998	40.314	65.9475	8.52687	47.145	2.5
V98	14.22	3	78.4376	12.67	6.9975	3.2185	2.1785	35.8896	67.8571	8.43061	37.06	2.5
V99	11.5675	2.3	76.7274	49.355	6.178	3.247	1.907	52.4627	64.0966	6.16784	87.6	3
V100	12.3855	2	75.7446	11.455	6.8515	3.2715	2.1	33.9942	65.6058	7.51066	34.52	2
V101	13.0955	2.075	75.437	15.03	7.1455	3.354	2.137	31.1387	65.572	7.95957	41.125	3.25
V102	11.328	2.075	70.2172	21.255	7.0515	3.527	2.012	34.1213	63.7087	7.85377	52.65	2.5
V103	11.49	2.3	76.7273	30.625	6.5545	3.194	2.0575	31.1615	66.0772	8.08187	82.24	3.5
V104	14.054	2	75.8268	21.135	7.2515	3.414	2.129	28.4571	64.1347	6.44512	42.555	2
V105	26.626	2.25	79.0045	51.28	6.3335	3.11	2.0415	54.4468	66.926	8.53226	93.79	2
V106	14.674	3.525	75.7462	10.69	7.0775	3.4325	2.0665	58.6511	66.801	7.0499	36.685	4
V107	12.4895	2.45	76.8353	35.205	6.832	3.3275	2.0605	40.2118	66.5373	7.55606	76.755	3
V108	11.9135	2.2	74.6565	34.64	6.6765	3.3135	2.02	29.861	66.2089	6.62717	78.415	3.5
V109	14.7505	2.1	80.3556	28.87	7.142	3.758	1.9065	32.0363	67.7769	7.27765	67.08	2
V110	15.248	2.6	77.6488	10.725	6.6045	3.29	2.012	59.42	67.6497	7.78409	34.55	2.5
V111	13.51	2.35	76.494	36.21	6.406	3.437	1.869	54.5817	64.9402	9.13485	69.92	2
V112	11.7085	2.25	76.4812	25.44	6.6075	3.338	1.9855	43.5354	65.8915	7.53192	59.41	3
V113	10.4255	2.025	77.3001	49.225	5.985	3.2925	1.823	61.6445	66.3404	9.25684	83.93	3
V114	22.263	2.725	77.0187	51.81	6.4545	3.4175	1.8935	47.5505	65.0352	6.88974	92.37	2
V115	15.5623	2.80833	77.2	8.37333	6.56633	3.1185	2.11117	51.6	66.4	8.31	29.6617	2.66667
V116	25.244	2.575	79.5918	3.725	6.754	3.571	1.8985	59.5238	62.2449	7.17751	15.4	2
V117	12.4185	4.01667	77.0588	1.805	6.186	2.7945	2.222	46.9412	63	9.60727	7.13	1.5
V118	15.0615	3.50833	79.5556	2.665	6.343	2.8185	2.258	47.5556	71.5556	8.08898	14.345	2
V119	23.67	2.5	80.4348	4.205	6.13	2.987	2.0575	66.087	70.8696	10.3732	24.09	2
V120	12.799	5.825	77.4648	9.25	6.202	3.119	1.995	63.3803	67.1362	9.49288	35.355	2

## Sheet: Table S3(G)
taxa	AC	ASV	BRR	CD	GL	GLWR	GW	HRR	MRR	PC	PGWC	TD
V1	2.64019	0.0388203	-1.26619	23.2388	-0.372764	-0.407727	0.169198	-13.3203	-1.22559	0.668334	33.4626	0.591262
V4	2.40719	0.290857	-0.0298939	-2.80421	-0.241164	-0.334727	0.156098	-0.446988	0.796145	-0.261273	11.4516	-0.233738
V5	3.23085	0.0229925	-0.124905	-4.41708	-0.163964	-0.324277	0.179698	1.00491	0.629819	-1.06336	3.06206	-0.195187
V6	3.30289	0.139746	0.0156637	-5.10821	-0.294064	-0.425227	0.213998	1.11193	0.518858	-0.936807	-2.27145	-0.408738
V7	-0.891878	-0.150192	0.010317	-9.11095	0.260345	0.234199	-0.0658429	2.35939	1.05746	0.138841	-19.9762	-0.644306
V8	2.28041	-0.231982	0.317096	23.0364	-0.352002	-0.429852	0.195423	-3.56065	1.33328	0.0898312	31.2093	0.792348
V9	4.16359	-0.405254	1.58223	3.41179	-0.318764	-0.390327	0.172198	2.96954	1.40806	-1.11707	17.3136	0.141262
V10	-2.15783	-0.304519	0.279023	-5.05316	-0.538762	-0.428727	0.121493	3.50125	1.92085	-0.170013	-8.49545	-0.0708069
V11	3.90749	-0.0852537	-0.998191	4.82679	-0.570564	-0.583127	0.261998	-0.0124756	0.0918423	-0.21195	10.5866	0.716262
V12	2.36952	0.627217	1.13065	0.464674	-0.379982	-0.162427	-0.0259524	-0.429972	-4.81532	0.946941	-1.16854	0.0161096
V13	3.21159	-0.233587	-0.542944	-2.74821	-0.432764	-0.209027	-0.0146024	3.31959	0.191409	-0.545906	-4.77945	0.166262
V14	2.42419	0.474746	6.49246	-5.79021	-0.652264	-0.373727	0.0334976	7.88551	-1.38159	2.04595	-18.1354	-0.333738
V15	3.42509	0.156413	0.167104	8.13479	-0.371864	-0.375627	0.139698	0.110882	0.291132	-0.27989	26.9876	0.766262
V16	3.35889	0.648163	0.649069	9.52179	-0.468964	-0.479927	0.195398	3.34929	-0.0294581	0.694702	29.5036	0.641262
V17	2.34589	-0.335254	0.268984	4.02979	-0.290164	-0.203927	0.0355976	0.316298	0.232631	0.822881	8.43155	0.541262
V18	3.70799	0.932413	1.37627	-2.18721	-0.363564	-0.171627	-0.0176024	4.12823	1.77758	0.282615	-5.60245	-0.158738
V19	4.15966	0.0467806	1.04144	-0.424006	-0.458618	-0.282072	0.0363736	-7.41834	1.74209	-0.139509	1.24412	0.566262
V20	4.14569	0.54308	0.930558	-4.34821	0.116036	0.288873	-0.160602	2.36107	1.16198	-0.0314546	-9.99845	-0.158738
V21	-3.07061	-0.49692	-1.2759	-6.93621	0.200436	0.474473	-0.236802	0.518721	-0.511391	-0.619866	-17.8444	-0.558738
V22	-4.07179	-0.0627537	-0.67154	-8.12621	-0.0389107	0.300374	-0.212252	2.65059	0.166031	-0.340121	-19.9869	-0.558738
V23	-4.01548	-0.230447	-0.899646	-6.57962	0.203136	0.320973	-0.151756	0.822044	0.274223	-0.446857	-13.7323	-0.408738
V24	-3.89071	-0.380254	-3.29471	-8.03221	0.0582355	0.278173	-0.171202	2.77933	-0.576722	-0.0276777	-18.6024	-0.708738
V25	1.25719	0.399746	-1.3189	0.793793	-0.357764	-0.0606266	-0.0881024	-0.563276	-0.66692	0.949007	-2.75145	-0.383738
V26	-4.07021	0.257413	-0.903309	-8.33721	0.0304355	0.213173	-0.140702	-1.55505	-0.508102	0.316129	-21.4274	-0.608738
V27	-2.97761	0.0980796	0.671849	-6.56921	0.382436	0.335673	-0.106302	0.394367	0.268858	-0.452828	-15.4464	-0.483738
V28	-7.00071	-0.210254	-1.94295	-6.79621	-0.456264	-0.00852655	-0.161102	5.5379	0.0166608	0.27228	-18.6254	-0.258738
V29	-0.812106	-0.233111	-1.03851	8.29379	0.101436	0.0921734	-0.0408024	1.84388	-0.119564	0.208263	10.9076	0.216262
V30	-2.06256	0.818913	-1.31953	-8.72771	0.486486	0.184173	0.0262218	7.7146	-0.783476	-0.237981	-21.1941	-0.808738
V31	1.55329	0.14308	-0.0130466	5.28399	-0.247364	-0.236227	0.0842976	6.20586	1.19488	0.714438	20.1558	0.546362
V32	0.482679	0.180913	-2.4786	14.0599	-0.188043	-0.0233766	-0.0469829	-14.1828	-1.48243	1.09867	13.4702	0.0438121
V33	-0.0827058	0.67808	-0.750806	-9.64621	-0.307664	0.0650734	-0.157702	3.36971	0.29755	0.116663	-24.9774	-0.658738
V34	-0.0125058	0.209746	0.0225504	-7.20721	0.503236	0.336973	-0.0709024	5.61083	0.791265	0.107353	-12.2614	-0.558738
V35	-0.0170058	-0.17192	-1.59442	-1.26821	-0.380064	-0.331227	0.113298	-5.9918	0.326415	0.895986	3.86755	0.241262
V36	1.93459	-0.380254	-0.35728	-3.44621	-0.299064	-0.322027	0.126398	-3.71926	1.80359	0.0633753	2.41855	0.166262
V37	2.62919	0.279746	-0.268893	0.690793	-0.368464	-0.428227	0.187198	5.29443	1.32903	0.0800458	14.0026	0.191262
V38	0.784094	0.246413	-0.479326	4.66879	-0.457564	-0.437527	0.161798	2.47545	0.767977	0.131165	14.2296	0.691262
V39	-6.07601	0.105413	-0.168697	-1.38921	-0.409664	-0.240727	0.0210976	-0.915367	0.994774	0.898781	-5.92445	0.366262
V40	-4.22865	0.415724	-1.93009	-6.54074	0.0690773	0.10706	-0.0598726	-3.37301	-1.30085	0.0371068	-19.5886	-0.531325
V41	-4.56521	0.184746	-1.41963	-3.94821	0.334336	0.224073	-0.0516024	-9.44986	-1.05355	0.238005	-11.3764	-0.433738
V42	0.834555	-0.400553	-1.31272	-1.51971	-0.0213145	0.0683234	-0.0142524	1.41539	-0.539502	0.675859	-8.39745	0.0787621
V43	2.49679	-0.100254	-0.872037	1.08079	-0.409564	-0.471727	0.210798	1.79611	0.840459	-0.311608	8.56955	0.591262
V44	3.38669	0.191413	1.08039	5.66179	0.198736	0.103173	-0.0198024	1.36597	1.30537	-0.0603017	16.5736	0.291262
V45	3.56679	-0.13692	1.35773	2.06979	-0.443664	-0.411127	0.143498	0.921444	0.995639	-0.701198	14.2876	0.691262
V46	2.34694	0.0168194	0.735853	3.14866	-0.285334	-0.257705	0.0849476	-3.44866	0.817052	-0.474996	14.9737	0.366262
V47	2.59759	-0.0705871	-0.316622	8.91379	-0.469264	-0.375727	0.102898	-1.52013	0.302938	-0.226365	25.9136	0.841262
V48	-6.61601	0.134746	0.254558	17.2878	-0.417064	-0.372927	0.120798	-9.95865	1.34142	0.62491	17.9136	0.791262
V49	5.15449	1.0245	1.18859	11.8938	-0.638864	-0.588027	0.236498	-2.54787	-0.458521	-0.382346	37.4846	1.14126
V50	3.67999	-0.239787	1.54726	17.3448	-0.355164	-0.341427	0.117698	0.335507	0.164501	0.103605	33.5866	1.29126
V51	1.02479	0.124996	-0.203917	12.8248	0.00403552	-0.137127	0.0960976	-4.90324	0.804745	-0.212757	16.9736	0.841262
V52	2.15231	0.496438	0.21286	7.59331	-0.443994	-0.104448	-0.0903226	9.19872	-0.0803264	1.33039	9.09685	0.512558
V53	0.391976	-0.454593	0.769315	-4.11473	0.285434	0.343217	-0.131921	4.38719	-0.132419	0.0233439	-9.3973	-0.480034
V54	3.01909	-0.13567	1.85188	-0.149207	0.228236	0.0295734	0.0413976	-0.182298	1.55805	-0.0381957	8.33955	0.0162621
V55	-3.88172	-0.44537	0.193164	-4.84171	0.496486	0.256913	-0.0215374	2.78365	1.10874	-0.0749534	-9.79595	-0.558738
V56	2.13394	0.61808	-1.02091	5.19729	0.480244	0.159386	0.0368646	3.47519	-0.205302	-0.318708	13.0026	-0.358738
V57	-3.60631	-0.39892	-0.28402	6.13579	0.218036	0.0386734	0.0354976	-0.737246	0.549504	-0.20213	15.0966	0.641262
V58	2.34489	-0.618587	0.714472	2.26179	-0.353464	-0.324327	0.104798	3.96646	1.31362	-0.456823	16.0896	0.391262
V59	2.14031	-0.19382	0.145183	-7.79762	-0.12272	-0.206059	0.085139	7.73797	2.07523	0.257009	-16.1895	-0.47776
V60	2.81799	-0.541087	-0.0194344	-7.36921	0.353336	0.127173	0.0167976	10.974	1.97278	-0.890958	-17.2884	-0.683738
V61	-2.14711	-0.584182	-0.059644	-3.02121	0.0115355	0.168673	-0.111502	0.602733	-0.519238	-0.148402	-6.90045	-0.258738
V62	3.48379	-0.281444	-0.0805923	15.8228	-0.561264	-0.415027	0.102798	-2.26854	-0.138001	0.0903712	25.7746	1.09126
V63	3.34199	-0.207106	0.0279594	24.0628	-0.462264	-0.418227	0.145598	-11.4615	-0.714319	0.327548	36.2156	0.841262
V64	-0.00294525	-0.00662547	-2.46503	3.56179	-0.234298	-0.209914	0.0666405	-7.82883	-2.14315	1.6044	7.18024	0.53941
V65	1.30479	0.0614884	0.634902	-3.40763	-0.129731	-0.0938878	0.00781669	4.24848	1.23885	0.278202	-6.81817	-0.106886
V66	2.32059	-0.328822	0.929095	-0.616767	-0.271907	-0.151987	0.000438187	4.39468	1.28378	-0.33655	-0.80355	0.0412621
V67	-1.05546	-0.400671	0.000130546	-5.48423	0.127413	0.0934438	-0.0331839	2.4402	0.670209	-0.758004	-11.7407	-0.358738
V68	-6.32101	-0.278587	-0.449963	2.38879	-0.0217645	-0.0563266	0.0219976	-15.9358	-0.898633	0.283272	0.757554	0.166262
V69	1.14538	-0.197714	0.820042	-1.57421	0.223264	0.07177	0.0134476	-0.0831648	0.128447	0.145055	1.08755	-0.00873793
V70	-2.28256	-0.429464	-0.296161	-1.34279	0.214936	0.216852	-0.0794099	-0.806512	-0.403177	0.444925	-0.178339	-0.19143
V71	1.05149	-0.130254	-0.704822	5.11679	0.0197355	-0.118127	0.0790976	0.464728	-0.30095	0.0612097	21.6726	0.516262
V72	3.57659	0.236413	0.734026	-4.56021	-0.594264	-0.528627	0.190498	3.78866	2.85831	-0.787041	-4.66845	-0.0837379
V73	1.45949	0.695996	0.300942	-7.39221	0.0468355	0.0794734	-0.0423024	8.79171	1.4371	0.152628	-15.1224	-0.483738
V74	2.61329	0.11808	-0.422531	16.7135	-0.115914	-0.268177	0.157498	-3.35192	-1.20135	0.577624	28.6271	0.928762
V75	4.28769	0.0230796	-0.277284	4.50179	-0.237164	-0.213527	0.0606976	0.614941	0.255001	0.216586	14.7336	0.841262
V76	4.08194	-0.425138	0.931413	3.78329	-0.0287338	0.00777345	-0.0175024	1.60926	0.811856	-0.0756694	10.4824	0.241262
V77	4.05169	-0.0340037	1.12602	5.04779	-0.277964	-0.395227	0.194398	-0.251936	0.836522	0.560662	17.9836	0.816262
V78	-4.63811	-0.152887	0.963106	-0.324207	0.499936	0.295273	-0.0475024	-8.27617	-0.642109	-0.24849	1.22155	-0.0587379
V79	-0.923606	0.751413	0.712739	-6.84921	0.318136	0.171373	-0.0219024	4.78852	0.107757	-0.605473	-18.2984	-0.583738
V80	3.98989	0.43708	0.722139	8.07779	-0.322164	-0.211827	0.0285976	-6.19305	-0.212895	-0.141961	21.2566	0.716262
V81	-2.45256	0.489641	-0.927697	6.75115	-0.382219	-0.320055	0.112399	5.34857	-1.54728	0.597445	7.51995	0.0662621
V82	0.817744	0.26808	-2.1308	3.11338	-0.456167	-0.0897266	-0.104602	4.71497	-3.36455	0.788421	5.19882	0.0470121
V83	2.42232	-0.217137	0.166317	-7.73565	-0.16185	-0.157994	0.0463707	5.17507	0.528101	-0.290234	-14.0017	-0.514293
V84	2.62767	0.0721446	0.622978	-6.40326	0.287936	0.205919	-0.0541016	5.47693	0.841651	-0.053256	-13.0257	-0.465682
V85	3.34449	0.239113	1.22381	-0.563207	0.133336	0.187673	-0.0928024	5.11271	0.652179	-0.779824	1.07655	-0.308738
V86	2.23089	0.179172	0.629494	-2.10132	-0.148618	-0.126562	0.0464263	7.1276	0.477472	-0.442839	-0.953743	-0.153269
V87	-2.27076	0.474673	0.786118	-2.44271	0.266863	0.477652	-0.221145	-1.40555	-0.554582	-0.459448	-5.34945	-0.271238
V88	1.55671	0.453723	1.08542	-7.71205	0.285302	0.313346	-0.125583	4.87008	0.509043	-0.14568	-17.2896	-0.514207
V89	-0.945706	0.71808	0.742749	-13.7572	0.479436	0.235173	-0.0135024	10.0753	1.51476	-0.454031	-34.6494	-0.658738
V90	2.38189	0.12308	0.267862	-12.1842	-0.503764	-0.441927	0.148698	10.0902	1.91233	0.0584267	-25.3124	-1.05874
V91	-2.18311	0.266598	1.00367	-13.5132	0.491236	0.362673	-0.0903024	11.4018	0.880541	-0.481311	-33.2724	-0.858738
V92	-2.45656	0.407195	0.615045	-13.1485	0.547986	0.291901	-0.0299096	10.5972	0.364988	-0.502833	-32.6042	-0.983738
V93	-4.13341	-0.126504	0.425404	-8.96721	0.190236	0.410773	-0.205902	2.60629	0.669244	-0.165383	-21.8854	-0.583738
V94	-3.31241	-0.237754	0.682912	-3.7883	0.55796	0.360223	-0.0655524	-0.817228	-0.159739	-0.586726	-8.44336	-0.433738
V95	-3.62311	-0.30192	-0.193096	1.13479	0.429436	0.268473	-0.0484024	0.897388	-0.796285	0.65674	2.21955	-0.0587379
V96	-3.34111	-0.237787	-0.264706	-5.35021	0.615836	0.322073	-0.0280024	-7.70648	-1.31732	-0.599739	-9.54145	-0.208738
V97	-2.41726	-0.154392	-0.334525	0.928293	0.409686	0.323423	-0.0928802	-9.69673	-1.38659	0.651585	0.884054	0.0412621
V98	-2.30701	-0.0102537	-0.29201	5.94279	0.201936	0.124873	-0.0337024	-10.1214	-1.37393	0.559024	8.61155	0.416262
V99	-3.23172	-0.198058	-0.662397	8.72577	-0.015056	0.220732	-0.157052	-5.37986	-0.9647	-0.0146707	9.38206	0.538849
V100	-2.54311	-0.42292	-0.106462	5.05779	0.426136	0.256573	-0.0443024	-10.708	-1.01831	-0.482276	6.18855	0.191262
V101	-3.56851	-0.39192	-0.624988	-1.84421	0.621736	0.394073	-0.0692024	-5.29026	-1.60865	-0.412098	-3.54745	-0.183738
V102	-1.80471	-0.32192	-1.13876	-6.09121	0.585536	0.480273	-0.129002	-8.98719	-2.95487	0.257301	-11.9804	-0.533738
V103	-3.25611	-0.36692	-0.350441	-6.41421	0.375636	0.363373	-0.123402	-2.46803	-0.832558	0.12454	-14.7324	-0.358738
V104	-1.53891	-0.49817	0.278633	-6.80721	0.611236	0.353873	-0.0491024	2.61835	-0.48625	-1.74767	-13.0434	-0.358738
V105	1.75899	-0.431427	0.424105	0.436422	0.404794	0.306844	-0.0841542	1.13193	0.106618	-0.0436302	0.798739	0.0931139
V106	-0.297447	-0.0263428	-0.203073	-3.93806	0.686354	0.431903	-0.0740505	-0.928888	-0.748473	-0.281897	-7.30963	-0.23559
V107	-4.05161	-0.66192	-0.477868	-0.471207	0.477136	0.359573	-0.0923024	-6.89538	-1.46892	-0.142989	0.696554	0.441262
V108	-3.27951	-0.53692	-0.170493	0.487793	0.575136	0.453373	-0.116802	-9.20573	-1.30122	-0.24487	1.04155	0.0162621
V109	-1.57771	-0.57192	0.379592	1.25579	0.534636	0.501573	-0.157102	-11.2278	-1.37481	-0.475094	-0.310446	0.0162621
V110	-1.72411	-0.104539	0.132353	-4.00721	0.340136	0.233873	-0.0568024	-5.26539	-1.48368	-0.33008	-7.06745	-0.358738
V111	-2.39811	0.204746	-0.663239	-2.00721	0.305036	0.289073	-0.101502	1.99551	-1.52578	-0.0360536	-4.98545	-0.533738
V112	-3.67581	-0.235624	0.165389	2.32879	0.409736	0.313873	-0.0850024	-10.1455	-1.33196	-0.25448	0.952554	-0.108738
V113	-4.50011	-0.406004	-0.0562804	4.37279	0.123036	0.300073	-0.162202	1.40691	-2.17858	1.33707	5.94955	0.141262
V114	-3.65551	0.110281	0.17632	-4.95596	0.356173	0.441582	-0.167202	-5.82815	-1.83622	-0.363901	-11.0697	-0.374884
V115	-1.63651	0.689054	-0.246752	-11.3725	0.465011	0.207273	-0.000702386	8.38843	0.0409326	-0.479022	-27.5764	-0.658738
V116	2.76165	-0.175586	0.246155	1.11237	0.0640135	0.0635153	-0.020375	-1.6028	-0.0409335	-0.398295	3.74219	0.110481
V117	-1.29317	0.127619	-0.291496	-1.68015	0.0032831	-0.0106341	0.00765828	-4.2286	-0.198897	0.0763673	-4.73604	-0.079917
V118	-0.976431	0.187795	0.0990587	-1.89248	0.0640716	-0.0243015	0.0345642	1.17857	-0.255784	0.153744	-4.34314	-0.198809
V119	2.33124	-0.260962	0.287718	1.7073	-0.110925	-0.0634891	0.00762273	1.81537	0.567043	0.0659518	4.51877	0.145401
V120	-2.82329	0.121134	-0.341436	0.752957	-0.0204428	0.0349094	-0.0294702	2.83745	-0.0714279	0.102232	0.818227	0.0228439

## Sheet: Table S4(T)
taxa	P1	P2	AC	ASV	BRR	CD	GL	GLWR	GW	HRR	MRR	PC	PGWC	TD
V1	V1	AS	21.1565	3.20833	77.9763	33.815	5.89	2.597	2.274	28.2621	66.2793	8.18482	71.09	3
V4	V4	AS	13.9345	3.16204	78.8542	12.93	6.0025	2.679	2.249	51.9732	69.2894	7.15307	47.63	1.5
V5	V5	AS	18.529	2.91667	77.7777	8.195	6.2955	2.906	2.181	53.1428	66.9938	5.82858	30.31	2
V6	V6	AS	22.076	3.21667	77.8863	7.075	5.9135	2.5925	2.2855	43.6345	65.9459	5.98663	30.13	2
V7	V7	AS	13.9495	2.56667	77.5809	8.255	6.644	3.3575	1.9845	38.686	67.1755	7.76541	26.49	2
V8	V8	AS	19.3125	2.53333	78.672	45.705	5.804	2.5655	2.2675	42.0098	67.652	7.5377	86.915	4
V9	V9	AS	21.2315	2.525	80.3089	14.3	5.949	2.6245	2.271	53.5201	69.4981	6.61147	47.915	2
V10	V10	AS	11.53	2.21667	78.375	6.98	5.6955	2.578	2.2135	44.3704	66.6677	7.50811	23.38	2
V11	V11	AS	20.969	3.36667	77.6709	10.755	5.8565	2.5915	2.268	54.2524	66.408	7.64553	42.215	2.875
V12	V12	AS	15.225	2.96667	85.2941	36.325	5.229	2.718	1.9265	33.8235	38.5294	13.5625	70.93	3
V13	V13	AS	22.202	2.70833	77.7361	8.7	5.855	2.795	2.1	55.0693	66.801	6.79052	29.51	2
V14	V14	AS	22.0985	4.49167	78.0632	3.61	5.638	2.57	2.199	60.0791	68.5771	7.49043	13.93	2
V15	V15	AS	25.108	2.61667	79.5724	27.15	5.8315	2.6055	2.242	53.3308	67.3585	7.36617	85.525	3.75
V16	V16	AS	24.9415	4.15	80.3137	26.51	5.8005	2.5425	2.2855	51.6952	66.1365	9.22105	87.525	3.125
V17	V17	AS	21.1005	2.625	78.2737	9.6	6.0015	2.758	2.1825	44.2505	67.1268	10.0855	33.165	2
V18	V18	AS	25.761	3.91667	80.9351	18.08	5.822	2.874	2.03	53.7481	68.2867	7.78961	47.335	3
V19	V19	AS	25.2478	4.2685	80.0428	14.801	5.95773	3.02027	1.98038	48.3724	67.5221	6.92168	39.7578	2.5
V20	V20	AS	23.69	4.4	78.9	9.93	6.202	3.212	1.936	42.9966	66.4685	6.56908	27.965	2
V21	V21	AS	12.4515	2.05833	78.5438	7.22	6.447	3.5205	1.839	43.6891	66.0212	6.74355	20.325	2
V22	V22	AS	11.9885	2.26667	77.1484	5.43	5.988	3.198	1.879	40.0391	66.6016	8.09912	16.775	2
V23	V23	AS	12.3206	2.82403	74.5629	4.73793	6.118	3.2435	1.89123	48.0771	66.8037	7.67159	15.8309	2
V24	V24	AS	13.3405	3.24167	72.8067	4.455	6.248	3.289	1.9065	56.1151	66.9802	7.19749	15.48	2
V25	V25	AS	21.328	2.35	78.2782	18.83	5.8475	2.8565	2.0545	45.8516	67.3208	7.1405	44.68	1
V26	V26	AS	12.0215	3.00833	77.7777	4.715	6.239	3.242	1.9305	54.5803	65.5	7.89716	16.855	1.875
V27	V27	AS	11.783	2.975	78.5842	7.215	6.4595	3.253	1.991	50.1902	66.7971	7.01518	23.27	2
V28	V28	AS	10.6575	2.39167	77.5816	4.41	5.783	2.9895	1.9405	50	67.2506	8.39999	13.38	1.5
V29	V29	AS	19.1125	3.30833	78.2777	20.5	6.366	3.101	2.06	57.7698	66.9225	7.80023	53.835	2.875
V30	V30	AS	14.099	4.70833	77.9722	3.81	6.8455	3.163	2.17	58.5383	66.0817	7.27613	17.76	1.125
V31	V31	AS	20.212	3.18333	79.5326	20.315	5.8465	2.5955	2.257	53.0164	68.0347	9.34671	62.49	3
V32	V32	AS	16.7295	3.225	74.6572	38.16	5.9945	2.828	2.128	19.2527	63.85	10.0453	62.33	3
V33	V33	AS	19.1765	2.33333	77.7991	4.76	5.9285	3.069	1.9375	50.5406	65.4238	7.34181	17	1.875
V34	V34	AS	18.0915	3.475	79.1094	6.47	6.78	3.303	2.0575	57.9436	67.8931	7.05923	27.535	2
V35	V35	AS	18.1055	2.69167	76.0739	7.625	5.9555	2.7905	2.14	34.3921	67.1	7.36059	23.48	3
V36	V36	AS	18.9615	2	77.7327	13.18	5.884	2.747	2.149	31.1746	68.9868	6.56121	39.85	3
V37	V37	AS	20.925	3.75833	78.7334	15.335	5.9355	2.6035	2.285	57.3941	68.2504	6.4801	53.33	2.75
V38	V38	AS	27.05	2.53333	79.291	24.4	5.729	2.514	2.2825	58.9276	66.863	6.19465	79.555	3.75
V39	V39	AS	18.353	2.75	81.0177	12.465	5.7995	2.724	2.1325	49.905	68.1006	8.22791	38.56	3
V40	V40	AS	21.5445	3.15833	78.1976	17.01	6.406	3.264	1.968	46.8154	65.0352	7.51963	42.275	2
V41	V41	AS	12.7895	3.54167	77.7375	9.155	6.499	3.159	2.0635	30.2	66.3	7.86119	31.195	1.875
V42	V42	AS	23.37	2.925	75.4864	47.74	4.9925	1.999	2.522	39.1998	62.8405	8.73199	92.245	4.875
V43	V43	AS	21.341	2.40833	78.1069	15.825	5.7985	2.5055	2.3215	47.9137	67.25	6.25194	52.895	3
V44	V44	AS	22.348	2.71667	80.8997	33.935	6.6435	3.124	2.1315	41.1349	68.4254	7.43575	84.705	3.5
V45	V45	AS	23.332	2.95	80.784	21.285	5.7685	2.5935	2.23	43.2472	67.6473	6.09783	64	3.5
V46	V46	AS	20.707	2.86667	80.5502	26.935	5.8125	2.6385	2.207	32.9261	67.9714	7.5778	73.41	3.875
V47	V47	AS	20.6155	3.525	77.4657	28.02	5.773	2.6085	2.218	42.0145	65.9516	7.11	78.785	4
V48	V48	AS	8.087	3.60833	78.6	28.965	5.736	2.677	2.147	23.4	67	8.78727	51.76	3
V49	V49	AS	24.001	3.84	79.8831	32.62	5.733	2.5305	2.27	41.9178	64.874	6.65151	92.275	4
V50	V50	AS	24.762	2.625	81.0912	37.48	5.894	2.6665	2.2155	47.369	66.4716	8.26354	83.59	4
V51	V51	AS	15.8505	3.19167	79.5321	11.31	6.541	3.224	2.0385	52.5748	67.752	7.73952	32.725	2
V52	V52	AS	17.0755	2.73333	78.2313	41.26	5.3575	2.679	2.0055	55.9184	62.381	12.0815	81.565	4
V53	V53	AS	18.269	2.30833	79.5658	10.84	6.517	3.453	1.8955	56.9722	65.6136	7.19318	34.765	2
V54	V54	AS	19.4435	2.975	80.5067	16.305	6.5515	3.046	2.156	44.4562	68.0318	7.37859	51.8	2
V55	V55	AS	12.453	2.21667	77.6703	8.61	6.6915	3.293	2.0375	49.4992	65.8286	7.31326	26.88	2
V56	V56	AS	20.3655	5.61667	77.67	30.425	6.633	3.2365	2.056	57.7402	66.1317	7.77802	83.365	3
V57	V57	AS	11.45	2.09167	77.9335	23.025	6.4465	3.1995	2.02	56.8214	66.4116	6.80132	55.35	3
V58	V58	AS	19.0535	2.16667	80.594	19.965	5.908	2.7255	2.1745	49.902	68.7143	7.42219	64.51	3
V59	V59	AS	19.4615	4.175	77.1186	4.97	5.9845	2.7525	2.1865	52.5424	69.0678	8.96999	14.55	2
V60	V60	AS	21.6985	2.49167	79.1755	9.695	6.529	3.1385	2.088	62.8694	67.9759	6.64098	33.37	2
V61	V61	AS	16.3145	2.15	78.125	15.375	6.3325	3.238	1.963	39.2578	65.0391	7.11364	38.595	2
V62	V62	AS	20.3865	2.99405	78.6853	26.85	5.8185	2.648	2.203	36.056	67.1315	8.03052	61.885	3.5
V63	V63	AS	21.4205	2.65	78.1732	62.87	5.707	2.622	2.1795	23.5261	63.2533	8.65086	96.49	2
V64	V64	AS	20.706	2.58333	78.8558	15.135	5.75	2.6625	2.1645	33.1667	67.7884	7.81566	42.44	3.25
V65	V65	AS	21.971	2.18333	80.2353	9.925	6.0025	2.8275	2.127	44.7733	69.85	8.50556	33.445	2
V66	V66	AS	19.5067	2.21978	79.7689	9.8356	6.11717	2.94655	2.0818	49.8396	68.3739	7.57922	32.3788	2
V67	V67	AS	15.1605	2.325	78.8526	9.81	6.2175	3.0375	2.055	51.9843	66.7979	6.65288	32.035	2
V68	V68	AS	11.0505	2.88333	77.6669	14.985	6.3715	3.099	2.0635	29.9606	66.6802	8.14487	38.17	2.75
V69	V69	AS	11.6749	2.85436	78.5978	11.45	6.49814	3.20448	2.03725	38.838	66.6138	8.02999	32.885	2.375
V70	V70	AS	13.3435	2.79167	79.5288	7.915	6.564	3.2745	2.011	47.7154	66.5334	7.78778	27.6	2
V71	V71	AS	19.434	2.68333	78.1618	20.21	6.231	2.8625	2.184	41.92	66.2831	7.4012	64.16	3
V72	V72	AS	22.0865	3.05	78.8668	13.79	5.6615	2.4945	2.275	47.0624	68.3021	6.71254	45.235	2.875
V73	V73	AS	21.5945	3.55833	79.6043	9.9	5.576	2.5925	2.156	52.0775	69.1088	6.96533	40.455	2.5
V74	V74	AS	22.366	3.36667	77.4949	40.925	6.0885	2.625	2.325	43.7062	64.194	8.21478	87.135	4
V75	V75	AS	22.1415	2.875	78.5013	21.565	5.971	2.742	2.1835	39.585	66.6669	7.54447	65.77	3
V76	V76	AS	22.5158	2.57975	79.3545	21.8025	5.94415	2.687	2.223	46.0531	66.9639	7.43252	64.8341	3
V77	V77	AS	22.89	2.44167	79.8028	22.04	5.9345	2.632	2.2625	52.5211	67.0599	7.32671	63.89	3
V78	V78	AS	10.762	3.04167	78.9679	13.495	6.6145	3.2375	2.048	30.1576	64.8828	6.84082	38.63	2
V79	V79	AS	15.0125	3.25833	78.7372	4.69	6.698	3.209	2.094	55.7095	66.7346	7.22615	19.865	2
V80	V80	AS	25.421	2.45833	79.4864	36.16	5.7225	2.7555	2.081	28.7142	63.8696	7.03937	83.38	4
V81	V81	AS	14.8015	4.58333	78.9171	2.93	5.6435	2.3995	2.3605	64.0632	69.0521	6.4531	7.47	1
V82	V82	AS	21.097	3.9	77.3393	14.395	5.8625	2.9755	1.9755	57.287	64.8477	7.39635	43.165	2
V83	V83	AS	21.032	2.51667	78.6561	9.005	5.912	2.7805	2.131	52.087	67.3913	7.07003	31.445	2
V84	V84	AS	22.018	2.80833	79.6446	9.32	6.4255	3.218	2.0025	54.3036	66.7995	7.95225	30.885	2
V85	V85	AS	21.299	2.75	80.7087	19.77	6.291	3.1625	1.9965	46.8504	67.3228	6.32436	52.44	2.5
V86	V86	AS	21.2585	2.79167	78.1485	9.515	5.899	2.634	2.247	58.4239	65.9451	7.48555	35.315	2
V87	V87	AS	13.114	4.05833	78.0813	13.17	6.4915	3.561	1.8295	50.2492	65.1647	6.87465	39.14	2
V88	V88	AS	20.049	3.34167	80.3157	7.27	6.4305	3.253	1.985	62.5657	68.6	6.98055	26.135	2
V89	V89	AS	16.4265	3.375	79.8828	4.28	6.628	3.1645	2.1005	61.7188	68.5547	6.54424	11.675	2
V90	V90	AS	22.0495	3.65	77.9738	6.72	5.7075	2.556	2.2405	52.7578	68.5203	7.16024	26.28	2
V91	V91	AS	15.0905	3.05093	80.1553	2.495	6.6295	3.3375	1.993	64.7877	67.8991	6.41225	10.35	2
V92	V92	AS	14.098	4.125	78.6446	3.21	6.721	3.1825	2.1175	62.1672	67.3699	7.43567	12.12	1.875
V93	V93	AS	12.188	2.38542	79.3648	6.365	6.393	3.3245	1.929	48.0107	67.6559	6.91554	20.54	1.875
V94	V94	AS	11.7125	2.55833	80.3422	13.785	6.726	3.331	2.027	43.2718	64.7196	6.46996	41.1	2.125
V95	V95	AS	12.2125	2.59167	78.4461	15.245	6.738	3.228	2.095	45.241	65.6321	7.38548	44.115	2
V96	V96	AS	13.0345	2.78333	77.8431	12.65	6.8485	3.347	2.0545	28.6471	65.8824	6.58484	36.13	2
V97	V97	AS	13.067	2.65833	78.6975	12.455	6.704	3.351	2.0085	25.7157	65.9833	8.05318	38.31	2
V98	V98	AS	14.2965	2.40833	78.431	8.035	6.7045	3.1805	2.114	35.7141	65.099	6.84994	29.04	2
V99	V99	AS	10.292	3.6	78.4139	27.46	6.311	3.258	1.9445	32.078	66.25	6.7492	61.505	3.125
V100	V100	AS	12.4355	2.39583	77.3896	17.18	6.5205	3.2565	2.01	34.5043	64.1405	6.63265	48.285	2.125
V101	V101	AS	12.549	2.70833	79.0695	16.225	6.7385	3.3245	2.0335	40.0389	64.5351	6.39751	41.865	2
V102	V102	AS	13.7305	3.71667	76.5165	6.445	6.773	3.4205	1.989	43.4382	64.7748	7.23826	24.365	2
V103	V103	AS	11.8795	3.20833	77.4502	8.76	6.611	3.3485	1.9815	35.9487	64.904	7.73159	27.775	2
V104	V104	AS	14.146	2.3	77.9543	7.7	6.803	3.3225	2.055	52.7948	65.3495	6.2585	26.445	2
V105	V105	AS	17.0055	2.36914	78.3894	11.0981	6.85679	3.36385	2.03724	50.3943	65.2706	6.49687	35.3259	2.25926
V106	V106	AS	19.9018	2.49753	78.7679	17.4707	6.89009	3.44065	2.00426	44.4092	65.124	6.93956	51.8191	2.74074
V107	V107	AS	21.225	2.56667	78.9296	21.085	6.9015	3.482	1.9865	36.6641	65.0451	7.17793	60.7	3
V108	V108	AS	20.012	2.55833	78.0389	21.28	6.817	3.4195	1.9985	24.3172	65.685	6.4731	58.285	3
V109	V109	AS	21.603	2.29167	78.6688	26.59	6.8515	3.5645	1.927	29.5504	63.7	6.54079	61.7	3.125
V110	V110	AS	14.2715	2.225	78.2701	13.02	6.531	3.1595	2.073	34.3481	63.9926	6.76997	39.705	2
V111	V111	AS	13.584	3.20833	77.7361	13.625	6.504	3.249	2.01	48.2497	65.1	7.66108	37.915	2.125
V112	V112	AS	11.9555	2.825	77.7371	8.945	6.611	3.2765	2.023	41.9921	64.8463	7.3342	29.83	2
V113	V113	AS	18.442	2.125	80.0362	20.435	6.2915	3.3295	1.895	53.3482	66.1448	7.53711	50.145	2.5
V114	V114	AS	17.997	2.65226	79.9025	17.7563	6.35069	3.28904	1.939	58.2729	66.5026	7.38492	43.9835	2.41927
V115	V115	AS	14.8819	4.33273	78.9667	4.685	6.677	3.1605	2.119	60.3535	66.6366	6.89936	17.4112	1.9375
V116	V1	3A	25.4495	2.75833	79.7239	40.07	5.8335	2.5725	2.2735	43.2131	67.3229	7.04297	90.48	4
V119	V4	3A	27.2185	3	79.4865	18.985	5.975	2.685	2.231	48.5201	66.4683	6.51546	75.725	2.75
V120	V5	3A	25.473	2.40833	79.6512	16.23	6.014	2.6515	2.271	52.7132	66.6667	5.48917	71.98	2.5
V121	V6	3A	26.0905	2.89167	79.0602	14.08	5.988	2.6215	2.2875	57.8618	66.3419	6.17573	61.775	2
V122	V7	3A	21.382	2.475	79.4962	9.135	6.649	3.5595	1.8725	56.7538	66.806	7.95984	29.99	2
V123	V8	3A	22.757	2.70833	79.45	49.98	5.809	2.5485	2.285	63.182	73.8787	7.68994	92.965	4
V124	V9	3A	27.0335	2.89167	81.1258	26.395	5.8445	2.583	2.267	49	65	5.8439	84.44	3.5
V125	V10	3A	17.786	2.21667	79.1339	8.995	5.7015	2.6225	2.18	64.1898	72.6205	7.42499	31.4	2
V126	V11	3A	24.668	2.64167	78.4525	17.3	5.831	2.5585	2.2835	58.2321	67.5932	6.11493	62.96	3.25
V127	V12	3A	25.1611	2.50417	78.6526	16.864	5.78607	2.6915	2.1595	57.3279	66.7564	6.08679	59.4791	3.18674
V128	V13	3A	25.312	2.36667	79.0698	15.485	5.737	2.8245	2.0355	57.026	66.4729	6.07869	49.81	3
V129	V14	3A	21.4045	3.54167	79.7125	1.76	5.732	2.657	2.161	72.5944	75.2635	10.554	7.73	1.875
V130	V15	3A	25.36	3.4	79.0602	32.115	5.729	2.6135	2.196	34.2479	63.75	7.2	89.175	4
V131	V16	3A	23.4455	2.88542	76.3106	49.675	5.3575	2.3905	2.2545	61.5833	61.9401	7.80925	92.525	5
V132	V17	3A	25.154	2.7	80.7021	28.69	5.9305	2.7895	2.1325	40.1538	65.6926	6.28832	74.6	3.5
V133	V18	3A	21.398	3.25833	79.3771	16.87	5.8285	2.7935	2.092	45.3322	66.3442	7.30875	44.175	2
V134	V19	3A	23.9235	2.65	80.5504	20.45	5.7235	2.627	2.185	47.8393	67.7798	6.79442	58.765	2.5
V135	V20	3A	23.575	2.48333	80.1961	20.65	6.8235	3.447	1.9845	59.0578	67.0588	7.40317	57.325	3
V136	V21	3A	19.738	2.21667	78.9454	13.545	6.426	3.581	1.8	42.503	67.0553	6.45951	36.75	2
V137	V22	3A	19.529	3.4	79.7252	14.75	6.0625	3.319	1.832	55.3059	67.4452	6.94002	38.7	2
V138	V23	3A	20.099	2.675	79.5276	14.32	6.2145	3.3855	1.8405	59.0213	67.7165	6.46338	40.75	2
V139	V24	3A	19.2645	2.575	79.4562	18.8	6.6255	3.404	1.9525	45.4643	67.1286	6.20374	53.36	2
V140	V25	3A	21.078	3.15833	77.2834	12.235	6.367	3.409	1.8725	49.6506	66.0204	6.9257	34.905	2
V141	V26	3A	16.213	2.83333	79.8438	13.36	6.431	3.2315	1.997	48.95	66.8438	7.36632	37.82	2.25
V142	V27	3A	20.043	2.525	80.0018	16.18	6.8095	3.4355	1.9875	42.8039	66.8622	5.6787	44.865	2.125
V143	V28	3A	19.8505	2.1	77.8207	15.19	5.8115	3.068	1.8995	54.8677	67.7038	7.29472	38.775	2
V144	V29	3A	18.125	2.68333	76.9528	34.87	6.472	3.142	2.066	39.1078	64.6487	7.78999	76.19	3
V145	V30	3A	19.347	2.825	76.5051	5.185	6.847	3.39	2.0255	57.1198	64.6608	6.68077	15.345	1.75
V146	V31	3A	21.4885	2.86667	80.0384	22.395	5.806	2.6595	2.1865	44.0742	68.1837	7.37118	75.015	4
V147	V32	3A	21.0985	2.86667	75.0969	51.115	5.714	2.7375	2.092	22.6281	62.9273	7.07059	93.4	2
V148	V33	3A	22.413	2.10833	78.7528	6.27	5.879	3.097	1.9025	57.8911	67.0543	6.45631	20.495	2
V149	V34	3A	22.096	2.33333	77.9051	9.76	6.835	3.482	1.9675	43.0224	65.3088	8.10792	29.555	2
V150	V35	3A	22.279	3.05833	78.3784	18.125	5.3175	2.164	2.462	38.9961	66.4093	9.79773	78.485	3
V151	V36	3A	23.9395	2.74167	79.1233	19.32	5.922	2.6225	2.2625	57.4538	68.685	7.53	73.715	3
V152	V37	3A	24.2205	2.51667	78.3223	20.665	5.7535	2.576	2.238	56.4062	66.7964	6.37025	68.005	3
V153	V38	3A	10.625	3.00833	76.9822	32.335	5.345	2.379	2.2535	44.7273	65.8709	10.1307	75.39	4
V154	V39	3A	11.952	3.85	75.4175	6.755	5.9555	3	1.9915	48.5825	64.2501	8.43262	20.285	2
V155	V40	3A	15.9446	3.52156	76.9122	19.085	6.24846	3.14679	1.98694	45.7696	65.1113	7.32901	41.3425	2.5
V156	V41	3A	19.8175	2.88333	78.5638	31.415	6.475	3.2745	1.9825	42.9567	65.9724	6.79922	62.4	3
V157	V42	3A	20.937	2.08333	78.7551	6.08	6.7155	3.6075	1.8675	53.9088	65.4993	8.31131	21	2
V158	V43	3A	25.3945	2.9	79.2899	16.65	5.7945	2.5435	2.282	57.6063	67.4583	7.13306	59.39	3.875
V159	V44	3A	24.274	2.94167	78.1732	21.1	6.587	3.4025	1.9445	40.5787	64.1878	6.0737	59.175	3
V160	V45	3A	24.4115	2.8	80.9426	24.76	5.706	2.608	2.192	55.2559	67.5845	7.2178	71.175	3.75
V161	V46	3A	22.6805	2.845	79.0644	17.955	6.562	3.2375	2.0315	38.02	66.1085	6.91531	51.675	2
V162	V47	3A	23.502	2.54167	79.5294	33.415	5.697	2.682	2.1285	55.8408	66.7984	8.00929	82.24	4
V163	V48	3A	19.4935	2.88333	79.3281	30.935	5.823	2.6195	2.228	41.3557	67.95	7.51477	70.16	3.125
V164	V49	3A	25.427	2.68667	80.4762	28.72	5.6705	2.5115	2.2615	40.6303	66.8627	6.76693	86.18	3.75
V165	V50	3A	23.732	2.60833	80.906	36.775	5.8145	2.658	2.1925	46.1725	66.4772	7.30002	84.835	4
V166	V51	3A	25.239	2.60833	79.029	32.36	5.998	2.78	2.1635	33.7152	65.1457	5.98204	76.695	4
V167	V52	3A	25.199	2.16667	79.5585	18.225	5.908	3.03	1.955	60.814	66.2771	7.46075	48.01	2.875
V168	V53	3A	25.57	2.30833	79.6044	13.56	6.538	3.42	1.917	48.7193	66.1386	6.97507	39.39	2
V169	V54	3A	24.5505	2.25	81.25	18.31	6.58	3.1605	2.086	44.7062	68.075	7.32889	62.62	2.875
V170	V55	3A	13.1075	2.075	78.106	11.435	6.7365	3.329	2.0285	51.0417	67.0614	7.27747	34.93	2
V171	V56	3A	18.1898	2.225	78.4271	21.3525	6.41104	3.08106	2.09283	47.2924	67.4569	6.6105	55.465	3
V172	V57	3A	23.272	2.375	78.908	31.27	5.966	2.761	2.167	43.543	67.8523	5.98702	76	4
V173	V58	3A	23.1545	2.26667	79.1831	21.23	5.7825	2.6575	2.1795	55.2992	66.5319	6.32212	72.21	3.75
V174	V59	3A	22.7975	2.47917	80.1881	2.815	6.0625	2.709	2.247	53.7188	67.6545	8.17044	12.7	2
V175	V60	3A	24.232	2.1	77.1	5.235	6.7505	3.259	2.076	58.097	65.6199	5.94816	13.83	1.5
V176	V61	3A	24.8885	2.44792	79.6432	25.625	5.5665	2.6055	2.143	47.1157	66.0089	6.31909	66.04	3.5
V177	V62	3A	25.4375	2.525	80.5855	33.02	5.6615	2.582	2.199	53.1798	68.0897	7.25519	79.855	4
V178	V63	3A	24.0125	2.45	80.1176	32.8	5.7275	2.705	2.124	44.2344	68.1797	6.47378	74.815	3.5
V179	V64	3A	23.5965	3.19167	77.1659	18.97	5.8605	2.654	2.2155	39.9612	66.3395	7.90294	57.555	3
V180	V65	3A	25.7285	2.36667	78.9373	16.185	5.9205	2.884	2.057	56.1886	66.5365	6.40563	50.925	3
V181	V66	3A	25.1225	2.26667	80.4729	20.765	5.689	2.7775	2.052	54.5357	67.259	5.88589	57.965	4
V182	V67	3A	20.6995	2.46667	79.6825	11.515	6.399	3.2255	1.9895	55.6835	68.0439	5.91421	35.215	2
V183	V68	3A	12.002	2.71667	78.6415	17.05	6.0185	2.6895	2.246	13.7876	65.243	9.0132	44.335	1.875
V184	V69	3A	24.526	2.525	80.8591	13.67	6.529	3.1285	2.0915	58.7877	66.4076	6.38327	46.805	2.25
V185	V70	3A	19.8305	2.04167	78.6294	17.24	6.6615	3.4195	1.9535	41.1771	64.9022	6.81554	48.1	2
V186	V71	3A	22.345	2.69792	78.4585	25.21	6.3055	2.922	2.162	56.2609	66.6008	7.33094	76.875	3
V187	V72	3A	24.92	2.75	79.7247	14.13	5.4775	2.5135	2.185	53.4944	67.5786	6.75216	46.155	2
V188	V73	3A	25.171	2.39167	79.0199	6.41	6.492	3.3985	1.9155	65.9492	68.8262	5.79841	18.795	2
V189	V74	3A	26.5095	2.975	79.1656	39.715	6.043	2.648	2.2875	45.132	65.7669	8.59194	87.73	4
V190	V75	3A	26.466	2.90833	77.4264	22.75	6.011	2.832	2.1275	59.5081	65.4827	7.36137	68.825	4
V191	V76	3A	25.74	2.6875	80.3122	29.71	6.148	2.9925	2.061	55.028	65.8864	6.72434	74.565	3
V192	V77	3A	25.383	3.1	80.0794	31.035	5.9695	2.609	2.2915	41.9286	66.9348	7.00214	89.295	4
V193	V78	3A	20.157	2.77083	80.239	19.79	6.8925	3.3815	2.043	41.3022	65.2183	6.9594	59.1	3
V194	V79	3A	20.911	3.49167	79.8406	6.12	6.7855	3.409	1.995	59.4883	66.9924	6.36406	19.03	2
V195	V80	3A	25.992	2.88167	81.1394	32.32	5.8315	2.8325	2.069	32.6706	66.994	7.3869	77.485	4
V196	V81	3A	17.075	3.51667	79.1829	20.615	5.8645	3.0875	1.903	53.5019	64.9805	7.6273	56.225	2.125
V197	V82	3A	20.4752	2.98333	79.1348	14.103	5.94499	2.982	2.0165	56.7038	65.6148	7.25856	44.5863	2.02875
V198	V83	3A	23.8755	2.45	79.1209	9.76	6.119	2.8765	2.13	58.9628	66.7992	6.88982	34.8	2
V199	V84	3A	23.3255	2.625	79.2084	7.15	6.8695	3.395	2.028	63.1733	68.1212	6.98174	23.4	2
V200	V85	3A	25.501	2.78333	80.2753	15.115	6.5015	3.239	2.0125	57.699	66.8583	6.32176	48.2	2
V201	V86	3A	24.947	2.775	79.0168	22.74	5.911	2.616	2.264	61.6324	67.5968	6.85426	63.225	3
V202	V87	3A	19.0645	2.875	80.1979	16.825	6.563	3.469	1.9025	35.4461	64.9507	6.59866	47.51	2.125
V203	V88	3A	24.172	2.5	80.4353	14.04	6.536	3.4585	1.896	49.2079	67.19	6.62584	42.78	2
V204	V89	3A	22.5355	2.86667	80.4337	4.02	6.807	3.395	2.01	59.68	68.475	7.01308	14.77	2
V205	V90	3A	23.598	2.5	80.1979	2.56	5.7035	2.6305	2.173	62.7706	69.8279	8.40361	13.59	1
V206	V91	3A	22.4985	3.24167	80.0789	3.995	6.9845	3.5735	1.9595	60.1617	67.4544	6.16124	14.705	1.5
V207	V92	3A	21.3125	3.05208	79.8462	5.86	6.864	3.393	2.028	56.78	65.1173	6.56736	17.125	2
V208	V93	3A	19.8255	2.63333	80.1961	9.565	6.4225	3.5185	1.83	49.8039	66.8627	6.35622	26.685	2
V209	V94	3A	20.1205	2.60833	79.4516	9.86	7.103	3.5325	2.0155	54.0112	67.8137	6.52774	33.545	1.5
V210	V95	3A	21.138	2.4	79.1671	12.19	6.9415	3.398	2.048	47.5186	65.8725	6.47652	44.21	2.5
V211	V96	3A	20.3805	2.625	79.8011	12.565	6.893	3.354	2.06	41.9008	66.2694	6.49406	43.815	2.5
V212	V97	3A	21.872	2.95833	79.264	15.035	6.899	3.512	1.97	45.9347	65.1188	7.24987	48.765	2
V213	V98	3A	15.322	2.45	80.1576	28.975	6.7355	3.3185	2.035	22.9859	66.1484	6.28704	70.13	3
V214	V99	3A	20.1575	2.10417	78.836	29.045	6.466	3.4315	1.8895	31.8455	64.1	6.30965	66.075	3
V215	V100	3A	21.2305	2.4375	79.8019	20.325	6.824	3.396	2.0145	44.5535	65.5452	6.82688	56.01	2.875
V216	V101	3A	18.6005	2.09167	79.6847	19.45	6.9155	3.506	1.9785	35.3633	65.4318	6.56335	53.85	3
V217	V102	3A	22.2055	2.125	78.5161	13.775	6.9515	3.5595	1.9575	38.8266	66.7964	6.68384	46.18	2
V218	V103	3A	23.8845	2.30833	79.877	9.945	6.3775	3.4625	1.8475	56.8465	66.5057	7.14772	28.12	2
V219	V104	3A	22.514	2.275	79.5326	16.875	6.832	3.4225	2.0005	47.6434	64.7218	5.76609	50.035	2.875
V220	V105	3A	25.174	2.01667	80.1958	18.565	6.7845	3.444	1.974	55.3338	66.7939	6.60387	50.585	2
V221	V106	3A	23.3365	2.18452	79.2157	13.24	7.017	3.5335	1.991	47.8235	65.6	6.5288	43.6	2
V222	V107	3A	11.4675	2.2	76.4753	13.285	6.653	3.2625	2.047	38.3652	63.9224	6.92802	41.32	3
V223	V108	3A	14.87	2.15833	79.9194	14.845	7.1285	3.7215	1.924	31.0451	64.9632	6.70238	40.585	2
V224	V109	3A	21.9	2.26667	78.8252	22.545	6.7835	3.5065	1.9395	38.0445	64.55	6.36131	55.455	3
V225	V110	3A	22.275	2.88333	79.2144	17.58	6.6935	3.349	2.0025	36.0053	64.7099	6.84942	50.315	2
V226	V111	3A	21.1015	3.00833	78.2578	19.76	6.7055	3.38	1.9885	52.878	63.1352	7.24642	51.305	2
V227	V112	3A	20.9985	2.25926	80.0003	19.675	6.7025	3.353	2.004	29.7613	64.2725	6.64082	54.74	3
V228	V113	3A	13.364	3.28167	77.9299	16.265	6.72	3.54	1.9065	29.3048	62.6976	7.33533	42.385	2
V229	V114	3A	22.388	3.40208	80.117	16.78	6.5905	3.5935	1.867	34.4532	65.553	6.59727	50.155	2.5
V230	V115	3A	22.6369	3.50167	78.2744	4.2375	6.76475	3.34088	2.03012	56.124	64.7781	6.72245	13.3125	1.78125
V231	V1	Y58S	19.0755	3.275	74.8457	39.78	5.8295	2.623	2.2285	43.279	62.9594	8.50553	80.715	2.75
V234	V4	Y58S	19.659	3.01852	77.1352	16.7	5.991	2.735	2.1955	48.5883	66.8484	7.44745	63.825	2.5
V235	V5	Y58S	19.3339	2.88706	77.8433	21.185	5.9545	2.6885	2.22175	49.6898	66.3056	7.08549	68.7075	2.75
V236	V6	Y58S	18.3725	2.75833	78.4018	25.67	5.918	2.642	2.248	51.368	65.7627	6.87969	73.59	3
V237	V7	Y58S	12.5095	2.675	78.6989	7.11	6.4115	3.3095	1.9455	62.286	68	7.57299	20.615	2
V238	V8	Y58S	18.284	2.69167	76.9528	49.555	5.868	2.6035	2.2595	37.2057	62.8916	8.18228	92.005	3
V239	V9	Y58S	20.6285	2.475	79.6901	27.94	5.903	2.642	2.238	55.8284	67.4078	6.30567	78.02	3
V240	V10	Y58S	10.946	3	79.0514	8.405	5.58	2.5825	2.1635	58.6957	66.6008	7.57745	28.225	2.875
V241	V11	Y58S	20.6425	2.31667	78.7272	9.56	5.898	2.509	2.3565	45.2159	68.1899	7.02551	37.105	2.25
V242	V12	Y58S	19.4385	2.56652	78.4102	16.5554	5.83984	2.664	2.19775	45.5708	67.5263	7.46124	48.5654	2.6875
V243	V13	Y58S	18.2345	2.975	78.2353	22.64	5.7385	2.819	2.039	46.7294	66.8627	7.89696	55.515	3.125
V244	V14	Y58S	21.038	3.28333	79.1833	5.79	5.646	2.6115	2.1655	62.6453	68.0914	7.57171	25.13	1.5
V245	V15	Y58S	20.3655	2.29167	79.4182	20.285	5.788	2.625	2.2085	56.1178	67.5731	6.49321	62.03	3
V246	V16	Y58S	19.5165	4.815	80.2376	18.72	5.667	2.5505	2.2265	61.2555	67.5159	7.55753	64.89	2.875
V247	V17	Y58S	17.211	2.575	79.6	23.59	5.943	2.9215	2.045	54.8646	66.1504	8.51841	56.675	3
V248	V18	Y58S	20.96	3.44167	79.9213	12.6	5.812	2.836	2.053	55.7559	68.7957	7.11371	37.89	2
V249	V19	Y58S	23.237	2.325	79.9169	8.995	5.688	2.6995	2.1115	41.9364	67.7207	8.61489	30.125	3.125
V250	V20	Y58S	21.8435	3.18333	79.5326	9.23	6.2075	3.318	1.879	58.6947	67.25	7.90871	27.935	2
V251	V21	Y58S	12.589	2.39167	77.8071	7.175	6.318	3.4975	1.812	59.6354	65.5	6.26767	23.79	2
V252	V22	Y58S	12.3141	2.5875	78.0722	8.735	6.44327	3.4595	1.87325	58.1807	66.2824	5.94204	27.7625	2
V253	V23	Y58S	12.0695	2.78333	78.3372	10.295	6.516	3.38	1.9345	56.726	67.0647	5.82818	31.735	2
V254	V24	Y58S	10.0345	2.04167	75.2435	7.505	6.0555	3.256	1.866	61.13	65.634	8.34133	24.29	2
V255	V25	Y58S	21.17	5.05833	78.1618	17.02	5.6985	2.8805	1.9835	53.227	67.4376	6.74461	45.545	2
V256	V26	Y58S	14.4735	4.04167	77.7857	7.925	6.0035	3.1375	1.923	61.4024	66.1317	7.67124	23.475	2
V257	V27	Y58S	12.986	3.56667	80.6637	10.455	6.737	3.316	2.0395	52.3372	67.7713	7.12324	33.765	2
V258	V28	Y58S	9.491	3.025	76.5768	12.88	5.679	2.9685	1.918	60.6309	66.538	6.85125	35.86	3
V259	V29	Y58S	18.0185	2.5	77.7361	28.21	6.2025	3.156	1.972	55.6598	66.2104	7.3022	62.11	3
V260	V30	Y58S	17.4468	2.94583	77.8822	27.6675	6.04425	2.9485	2.08212	57.151	66.9919	6.98935	72.3467	3
V261	V31	Y58S	16.875	3.39167	77.9297	27.125	5.886	2.741	2.159	58.6422	67.7734	6.67651	77.59	3
V262	V32	Y58S	19.1855	2.84167	76.3562	41.4	5.928	2.7915	2.1305	23.7568	63.7599	9.24271	79.395	4
V263	V33	Y58S	17.1045	4.99167	78.3465	8.7	5.9285	3.1625	1.881	54.7244	67.126	7.79897	26.1	2
V264	V34	Y58S	16.309	3.46667	78.2946	13.045	6.641	3.3675	1.978	55.7008	66.0853	7.4648	43.74	2
V265	V35	Y58S	15.9445	3.15	74.9487	30.82	6.0085	2.851	2.1145	51.5814	64.1902	8.67138	78.345	3
V266	V36	Y58S	20.652	2.23333	78.0104	11.925	5.9205	2.7905	2.129	35.5814	67.2634	6.14347	35.305	2.75
V267	V37	Y58S	19.3365	3.63333	79.0565	22.835	5.7945	2.6055	2.228	52.7041	68.4363	8.58751	71.265	3
V268	V38	Y58S	22.2655	3.00833	78.9683	9.965	5.908	2.637	2.248	55.7746	68.0754	7.12249	37.285	2.5
V269	V39	Y58S	11.632	2.55833	79.4051	23.515	5.6475	2.638	2.149	50.2964	67.7223	8.9083	55.625	3.5
V270	V40	Y58S	13.366	3.875	77.3245	1.625	6.333	3.007	2.113	63.8533	65.3103	6.5716	8.805	1.125
V271	V41	Y58S	13.4945	3.025	77.2257	7.115	6.517	3.1645	2.067	43.2131	64.9504	8.13896	22.395	1.75
V272	V42	Y58S	20.2695	2.36667	79.0092	7.565	6.559	3.5295	1.8635	59.4702	68.7	8.40083	26.89	2
V273	V43	Y58S	19.2185	2.85	77.6241	28.79	5.83	2.567	2.2765	48.4094	66.9307	7.92948	71.055	3
V274	V44	Y58S	19.778	2.70833	79.5961	31.515	6.193	2.953	2.1015	57.5	67.35	7.44946	81.94	3
V275	V45	Y58S	19.373	2.91667	79.75	21.425	5.783	2.6185	2.212	59.9603	68.3254	7.18298	68.915	3
V276	V46	Y58S	18.0195	2.65833	79.8473	21.685	5.7585	2.6595	2.1705	57.4607	68.4882	7.09416	65.31	3
V277	V47	Y58S	18.209	3.15833	77.7594	27.59	5.8085	2.645	2.2005	54.686	67.35	7.6334	77.65	3
V278	V48	Y58S	8.021	3	78.6574	46.035	5.7275	2.6405	2.173	52.6311	67.3931	8.35606	77.7	4
V279	V49	Y58S	25.346	5.56042	79.1709	36.55	5.2015	2.014	2.5895	48.9062	64.9457	7.07064	95.525	3.75
V280	V50	Y58S	20.757	2.54167	79.0236	29.48	5.901	2.7085	2.1825	56.1214	66.6667	7.39875	74.005	3.5
V281	V51	Y58S	20.787	2.98667	78.8354	38.26	6.2405	2.87	2.194	31.3203	66.0194	7.33073	73.88	3.5
V282	V52	Y58S	20.8455	5.1	78.9488	11.39	5.779	3.034	1.9095	62.769	66.081	7.91933	35.95	2
V283	V53	Y58S	12.1965	2.08333	78.9883	9.015	6.6585	3.5665	1.8725	55.321	64.786	7.92391	27.425	1.875
V284	V54	Y58S	19.322	2.86667	79.7264	22.475	6.398	3.038	2.11	57.5196	67.2549	7.09124	70.235	3
V285	V55	Y58S	21.4764	3.59109	79.4373	15.8675	6.65775	3.1007	2.16233	59.538	68.4746	6.99718	49.7475	2
V286	V56	Y58S	22.302	3.98333	78.9771	9.26	6.9175	3.185	2.181	60.6281	69.0106	6.96703	29.26	1
V287	V57	Y58S	11.201	2.425	78.6574	25.02	6.556	3.2175	2.0425	53.9825	66.6026	7.82235	57.735	3
V288	V58	Y58S	19.219	2.10833	79.071	20.24	5.841	2.7055	2.163	57.8695	67.4414	7.30037	60.7	3
V289	V59	Y58S	18.685	2.20833	78.9773	11.11	6.014	2.9615	2.036	67.7841	68.1818	8.25362	36.265	2
V290	V60	Y58S	20.0485	2.64583	79.7232	12.38	6.502	3.187	2.0455	64.1149	69.909	7.40174	35.8	2
V291	V61	Y58S	12.6875	2.42411	78.2626	7.355	6.4615	3.2925	1.97	54.5588	66.0152	7.79017	24.095	2
V292	V62	Y58S	20.081	2.48333	77.1654	52.06	5.7395	2.572	2.2385	49.2126	62.9898	7.48809	91.715	4
V293	V63	Y58S	20.74	3.36574	79.65	35.925	5.937	2.615	2.2745	41.9302	69.2	8.09761	86.845	4
V294	V64	Y58S	20.3563	3.05703	79.5789	33.04	5.88683	2.66206	2.22271	42.5467	68.4418	8.05531	81.8934	3.74074
V295	V65	Y58S	19.5105	2.48371	79.3678	31.6879	5.79367	2.72069	2.1196	44.2596	67.0337	7.93454	76.3114	3.25926
V296	V66	Y58S	18.6605	2.175	79.0201	29.035	5.7435	2.8195	2.0435	46.8642	66.2755	7.74444	67.84	3
V297	V67	Y58S	17.9565	2.225	77.6488	18.23	6.3725	3.168	2.017	53.9798	66.4639	7.14378	46.975	3
V298	V68	Y58S	9.198	2.23333	78.8526	26.01	6.209	3.049	2.0405	48.1548	65.22	6.89542	59.66	3
V299	V69	Y58S	19.419	2.925	79.6813	23.76	6.4715	3.124	2.0775	53.7849	66.5339	8.80952	60.865	3
V300	V70	Y58S	11.147	2.46875	76.3373	19.39	6.123	3.3045	1.8615	58.6855	63.534	10.1305	47.465	2
V301	V71	Y58S	18.2275	3.30208	77.6973	25.325	6.1465	2.938	2.098	57.6735	65.6908	7.70906	72.93	2.875
V302	V72	Y58S	19.8935	3.55833	80.1186	16.555	5.5415	2.4885	2.232	61.8729	69.294	6.44342	54.54	3
V303	V73	Y58S	19.7025	5.65	79.2	19.93	6.361	3.052	2.0885	62	65.68	9.20705	65.9	2
V304	V74	Y58S	18.452	2.75833	79.5	28.435	6.0205	2.703	2.2335	40.7364	66.0243	7.89197	76.285	3
V305	V75	Y58S	19.7025	2.24167	79.0893	22.795	6.008	2.8815	2.092	54.772	68.0373	8.49081	58.535	3
V306	V76	Y58S	20.696	2.16667	79.2495	24.445	6.1285	2.9965	2.052	53.7542	67.3885	7.40578	60.89	3
V307	V77	Y58S	19.517	2.88333	79.9258	28.88	5.909	2.665	2.223	50.7896	66.3	8.89495	73.2	4
V308	V78	Y58S	9.6205	2.425	79.4985	17.83	6.601	3.343	1.9805	51.169	64.9906	7.43364	48.38	2.5
V309	V79	Y58S	13.392	3.89167	79.7278	6.915	6.5775	3.3375	1.9775	62.7945	68.3067	7.64481	21.505	1.125
V310	V80	Y58S	19.881	3.75	78.7719	15.24	5.9565	2.822	2.115	52.777	66.8669	6.95388	51.77	2.5
V311	V81	Y58S	11.2685	2.50833	77.8035	30.855	6.1885	2.6925	2.3035	54.551	65.4105	8.24634	64.77	3.5
V312	V82	Y58S	19.1915	2.96667	79.4917	11.035	5.955	2.884	2.0685	57.5842	67.5158	6.29168	36.27	2.125
V313	V83	Y58S	19.5631	3.01558	79.2238	13.5278	6.05157	3.01116	2.02037	56.2345	66.7149	6.55789	40.7837	2.22222
V314	V84	Y58S	19.7544	3.04205	78.7264	18.1572	6.23093	3.11591	1.996	53.5961	65.2277	7.05229	49.1663	2.40278
V315	V85	Y58S	19.8085	3.05	78.4585	20.65	6.3275	3.242	1.958	51.7846	64.4269	7.3185	53.68	2.5
V316	V86	Y58S	15.5853	2.92083	78.7393	20.6177	6.31526	3.47759	1.83218	51.1677	64.6228	7.19976	53.1801	2.5
V317	V87	Y58S	11.362	2.79167	79.0887	20.505	6.285	3.6375	1.735	50.8973	64.8903	7.08103	51.655	2.5
V318	V88	Y58S	20.7225	3.2	79.1833	13.955	6.2035	3.264	1.906	54.2982	65	8.32813	40.265	2
V319	V89	Y58S	14.44	3.71667	78.8235	5.495	6.606	3.327	1.992	66.4706	68.8	6.84506	18.68	2
V320	V90	Y58S	20.6895	2.26667	78.9492	6.84	5.6005	2.543	2.2095	62.2414	67.4452	7.08354	24.03	1.5
V321	V91	Y58S	11.984	3.68333	80.4575	4.7	6.576	3.325	1.9825	61.6087	67.5583	6.90116	18.8	2
V322	V92	Y58S	12.2342	3.58516	79.459	7.02377	6.45025	3.42714	1.87796	60.309	66.8204	7.1511	24.186	2
V323	V93	Y58S	12.4845	3.325	78.4605	10.63	6.3245	3.4605	1.833	57.9068	65.3209	7.40103	32.365	2
V324	V94	Y58S	12.301	2.40833	79.264	12.945	6.5725	3.338	1.976	51.1757	63.1777	6.12391	37.26	2
V325	V95	Y58S	8.833	2.65	74.0157	31.05	6.0115	3.3375	1.8115	53.937	63.3858	11.4592	67.78	3
V326	V96	Y58S	11.264	2.65833	77.8656	14.225	6.6895	3.324	2.0185	47.5296	63.4387	6.73084	41.05	2.25
V327	V97	Y58S	11.3925	2.22917	79.5753	12.14	6.6645	3.445	1.9425	46.666	66.0794	7.26326	34.19	3
V328	V98	Y58S	14.8485	4.1	79.5359	8.865	6.71	3.264	2.0615	47.3748	67.2484	6.28724	33.975	2.875
V329	V99	Y58S	11.2325	2.83333	77.7344	18.2	6.123	3.284	1.8705	62.5	65.2344	6.7049	43.5	2.875
V330	V100	Y58S	11.6685	2.63333	78.2516	17.155	6.6475	3.3105	2.0145	46.3409	64.8546	6.55444	45.925	2.875
V331	V101	Y58S	12.5545	2.86667	78.4331	18.355	6.729	3.4305	1.9685	47.2354	64.5092	7.06595	48.81	2.875
V332	V102	Y58S	11.7125	2.01667	76.9674	6.72	6.7595	3.5145	1.9305	39.9581	66.3388	7.51054	23.215	2
V333	V103	Y58S	11.086	2.36667	78.9765	19.535	6.616	3.4255	1.938	44.1086	65.4281	6.75581	52.815	3
V334	V104	Y58S	13.5255	2.71667	78.6674	10.4	6.8365	3.4155	2.0075	56.1433	66.733	5.87575	32.505	2
V335	V105	Y58S	17.9155	2.20833	79.2236	18.51	6.554	3.3145	1.9845	48.4186	66.9909	6.82793	50.92	3
V336	V106	Y58S	13.293	2.95417	79.1357	9.785	6.734	3.35	2.0165	50.0031	65.749	7.33396	28.79	2
V337	V107	Y58S	11.5045	2.05	78.303	14.72	6.6255	3.359	1.979	51.0387	65.4785	7.28587	41.805	3
V338	V108	Y59S	10.9315	2.18333	79.0092	14.38	6.617	3.3925	1.957	52.8696	65.7378	7.42523	40.19	2.125
V339	V109	Y60S	13.2735	2.25833	79.1862	14.485	6.6985	3.529	1.9045	36.4059	65.7597	6.79694	37.805	2
V340	V110	Y61S	13.4775	3.47024	79.7	9.11	6.452	3.3175	1.952	58.511	64.6172	7.37929	29.545	2
V341	V111	Y62S	12.7925	3.375	77.9762	12.11	6.428	3.37	1.914	60.7143	66.0714	7.60106	33.61	2
V342	V112	Y63S	11.0855	2.49167	78.7465	18.135	6.5915	3.403	1.945	44.6986	65.9425	7.08224	45.81	2.125
V343	V113	Y64S	9.974	2.19167	78.2732	27.335	6.174	3.2935	1.88	57.6402	66.6677	8.40761	60.705	3
V344	V114	Y65S	11.3935	2.97333	78.1906	8.79	6.638	3.389	1.965	41.5938	62.5406	7.11519	27.765	2
V345	V115	Y66S	13.2828	3.59708	78.2149	6.48375	6.53812	3.2205	2.03613	62.2417	67.5026	7.15278	22.1975	1.78125
V346	V1	GZ63	18.682	2.80833	77.6348	40.345	5.968	2.649	2.261	24.7432	65.3863	8.60636	76.31	2.5
V349	V4	GZ63	21.1685	3.93333	79.1335	11.315	6.096	2.6505	2.3045	46.6678	65.7506	7.39882	59.07	2
V350	V5	GZ63	23.2855	3.83333	78.7	8.5	6.239	2.6195	2.387	43.8238	67.1278	6.77555	38.405	2
V351	V6	GZ63	21.6295	4.03333	79.257	4.745	6.0855	2.5685	2.374	44.8123	68.2966	7.25324	21.505	1.5
V352	V7	GZ63	21.7391	3.57531	80.0225	5.83626	6.07205	2.58613	2.3508	48.0415	68.8934	6.98914	26.5713	1.57216
V353	V8	GZ63	22.0366	2.72469	80.8247	8.46308	6.06681	2.61887	2.32213	52.572	69.3243	6.49866	37.3288	1.75543
V354	V9	GZ63	22.4745	2.26667	81.1961	11.655	6.0545	2.6365	2.301	54.868	69.49	6.23456	47.115	2
V355	V10	GZ63	24.0244	2.43701	79.6714	17.0902	5.84151	2.556	2.29347	54.2027	68.5062	6.46716	55.045	2.56466
V356	V11	GZ63	25.328	2.76667	78.1467	20.95	5.639	2.4755	2.2825	53.5373	67.5223	6.89494	59.435	3
V357	V12	GZ63	23.699	3.175	80.1964	9	6.0735	3.0065	2.0265	54.922	68.4371	7.35199	27.795	2
V358	V13	GZ63	21.7005	2.85	78.1676	11.17	5.9145	2.7935	2.123	50.6451	66.6654	6.8142	37.245	2
V359	V14	GZ63	19.0855	2.7	110.582	44.155	5.3275	2.751	1.9425	40.8466	44.7619	13.5	86.7	3.875
V360	V15	GZ63	20.3695	3.1	78.7938	25.705	5.8195	2.628	2.2195	55.2529	68.2	7.46744	77.37	3
V361	V16	GZ63	23.446	2.79167	80.9892	22.665	5.893	2.5455	2.32	51.237	68.9112	7.79955	74.94	3
V362	V17	GZ63	19.1675	2.55833	78.95	18.445	5.974	2.806	2.1345	60.1978	68.8222	8.82235	50.63	3
V363	V18	GZ63	22.577	5.33333	80.7068	10.005	6.047	2.8505	2.126	57.2735	69.0932	8.16511	31.555	2
V364	V19	GZ63	19.2185	2.81667	79.3406	18.565	5.81	2.668	2.1825	25.8482	68.0637	7.19582	55.79	3.5
V365	V20	GZ63	23.5555	3.26667	80.5512	7.76	6.2865	3.244	1.9445	46.1672	67.583	7.27687	24.705	2
V366	V21	GZ63	12.503	3.05833	73.6332	11.505	6.46	3.359	1.9315	57.7938	63.8674	7.28376	28.68	2
V367	V22	GZ63	12.6845	3.65	77.9731	7.18	6.282	3.2485	1.9405	50.0941	66.2813	6.64061	25.185	2
V368	V23	GZ63	12.0225	2.45833	79.1256	9.28	6.693	3.331	2.0175	48.1131	66.7987	7.78702	31.67	2
V369	V24	GZ63	13.6115	2.1	75.5918	5.475	6.209	3.196	1.949	48.4273	65.9518	7.53733	18.61	1.25
V370	V25	GZ63	21.1615	3.16667	79.1748	9.355	6.025	2.859	2.113	63.518	68.7625	8.25522	29.63	2
V371	V26	GZ63	14.107	2.48333	78.2373	4.485	6.314	3.2145	1.97	39.8319	66.8599	7.21653	16.97	1.125
V372	V27	GZ63	20.2325	2.73333	79.5709	8.935	6.4465	3.417	1.8915	58.8828	66.538	7.01012	27.175	2
V373	V28	GZ63	12.262	3.23333	76.5	8.22	5.892	3.014	1.9595	57.2615	65.4881	6.72751	24.98	2
V374	V29	GZ63	18.5685	2.31071	78.483	35.14	6.26	3.0515	2.0605	50.6917	65.8992	7.64101	73.085	3
V375	V30	GZ63	15.2205	4.825	76.8582	2.645	7.038	3.224	2.1915	58.5066	64.1231	6.84964	11.165	1
V376	V31	GZ63	23.8015	2.76667	77.5855	16.946	6.6055	3.3125	2.0025	64.4908	67.2434	8.82866	45.926	2.5255
V377	V32	GZ63	21.7799	3.9875	77.9848	9.9905	6.20961	3.17125	1.9891	62.3244	67.7638	8.28511	28.558	2.01275
V378	V33	GZ63	18.9685	5.20833	78.4585	3.035	5.996	3.03	1.985	60.1581	68.1818	7.44563	11.19	1.5
V379	V34	GZ63	17.7315	3.21667	79.8828	9.305	6.7685	3.25	2.089	62.75	69.2609	6.91498	31.5	2
V380	V35	GZ63	19.688	2.31667	78.988	7.96	6.0845	2.7825	2.192	45.3337	69.4571	6.95178	28.675	2
V381	V36	GZ63	19.0245	2.59167	78.8706	18.27	5.9705	2.6875	2.226	55.3656	68.2944	8.545	64.73	2.875
V382	V37	GZ63	21.4095	2.875	78.4	13.89	6.0105	2.579	2.336	55.0966	67.4474	7.03358	55.655	2
V383	V38	GZ63	18.2715	3.89167	77.4319	36.14	5.7925	2.6115	2.223	54.8638	67.5097	7.20668	83.51	4
V384	V39	GZ63	11.208	2.86167	78.7603	19.01	5.6515	2.7205	2.081	51.8421	66.6268	7.72751	48.38	3.125
V385	V40	GZ63	11.3402	2.73333	77.0517	12.1123	6.08775	3.06364	2.00171	47.8032	65.1638	7.69041	33.902	2.38707
V386	V41	GZ63	11.7035	2.69167	75.3431	9.26	6.524	3.3305	1.9655	45.3255	64.2029	7.6234	27.875	2
V387	V42	GZ63	14.3603	2.75684	75.8977	13.8175	6.18475	2.94925	2.12325	49.2836	65.1182	7.57179	41.275	2.4375
V388	V43	GZ63	18.613	2.94167	77.2993	18.375	5.8455	2.568	2.281	56.3703	66.9271	7.48281	54.675	2.875
V389	V44	GZ63	22.444	3.83333	81.3878	12.05	6.1585	2.897	2.13	63.3725	69.3094	6.98193	39.195	1.75
V390	V45	GZ63	22.9875	2.48333	81.1777	13.09	5.842	2.6115	2.2425	49.0469	67.4938	6.09207	50.35	3
V391	V46	GZ63	21.5815	3.55	79.8416	18.455	5.8945	2.645	2.2335	56.2101	67.5136	6.39311	67.075	3
V392	V47	GZ63	20.899	2.25833	78.7858	22.31	5.8765	2.624	2.244	40.6752	67.1906	6.55613	72.235	3.5
V393	V48	GZ63	9.5115	2.44167	79.0514	34.085	5.8185	2.61	2.2335	35.1389	68.9723	7.41171	59.405	2.75
V394	V49	GZ63	21.473	4.42167	80.1569	19.06	5.6695	2.5585	2.22	53.3082	65.7613	7.38366	68.44	3
V395	V50	GZ63	20.4805	2.60167	80.3491	30.795	5.937	2.6895	2.2115	54.7194	67.3147	7.54502	78.905	3.75
V396	V51	GZ63	17.8405	2.78125	77.8232	53.35	6.003	2.7065	2.2235	59.9407	69.6826	7.59955	91.075	4
V397	V52	GZ63	18.8686	2.96887	78.7017	42.0826	6.10635	2.74789	2.2199	58.9797	69.2723	7.55252	79.1215	3.48148
V398	V53	GZ63	20.7779	3.14497	80.3331	21.1574	6.24699	2.82522	2.20841	56.727	68.5103	7.44084	55.7158	2.51852
V399	V54	GZ63	21.806	3.22292	81.2115	9.89	6.425	2.944	2.188	54.1278	68.1	7.30858	39.54	2
V400	V55	GZ63	14.7135	2.1	80.0005	11.945	6.7	3.266	2.057	51.0886	68.3134	7.14309	35.175	2
V401	V56	GZ63	22.902	2.6	79.2479	12.6	6.542	3.0765	2.1325	60.804	66.9979	6.90299	46.79	2
V402	V57	GZ63	19.6595	2.64	78.6407	22.72	6.3805	3.0365	2.1065	48.3493	66.6018	7.37243	67.815	3
V403	V58	GZ63	21.8845	2.49167	79.5276	15.575	6.0235	2.7025	2.2355	52.878	67.7165	6.51314	56.48	2
V404	V59	GZ63	21.5557	2.23634	79.9889	9.67932	6.35625	2.81772	2.2272	59.6305	69.3538	6.17819	33.7626	1.90489
V405	V60	GZ63	20.53	2.06667	80.195	6.61	6.689	3.0505	2.2005	63.9219	70.3894	6.04096	17.98	1.875
V406	V61	GZ63	11.454	2.125	78.8252	10.125	6.357	3.3775	1.8885	53.9817	66.2791	7.47843	35.44	2
V407	V62	GZ63	23.271	2.59167	78.7112	19.35	5.547	2.6605	2.09	50.8937	66.0136	7.05444	54.585	3
V408	V63	GZ63	22.526	2.49167	77.6996	41.085	5.7365	2.4585	2.348	39.6735	63.5175	7.75788	85.89	3.5
V409	V64	GZ63	13.5595	2.75	67.9245	25.245	6.475	3.238	2.0095	40.6604	48.8679	12.3642	57.715	3
V410	V65	GZ63	22.5925	4.15833	80.505	8.795	6.1765	2.851	2.1715	64.0463	69.5	7.89387	29.175	2
V411	V66	GZ63	20.0168	3.75405	79.8719	9.76661	6.23911	2.89365	2.16191	57.5432	68.593	7.17552	30.7257	2
V412	V67	GZ63	15.2332	2.99791	78.6963	12.0349	6.35539	2.97285	2.14409	45.466	66.9086	6.76952	35.1185	2
V413	V68	GZ63	12.6575	2.575	78.0632	14.63	6.418	3.0155	2.1345	38.9628	66.0016	6.64177	41.965	2
V414	V69	GZ63	22.076	2.55833	79.647	17.6	6.313	2.8695	2.2065	47.7466	66.3439	7.15025	62.685	3
V415	V70	GZ63	21.8502	2.46853	79.4144	16.2721	6.3195	2.86239	2.21496	50.4085	66.4957	7.23445	60.2455	2.83654
V416	V71	GZ63	21.6245	2.39167	79.1818	13.3	6.326	2.855	2.224	52.1628	66.7287	7.26296	53.755	2.5
V417	V72	GZ63	22.3005	4.04167	80.1151	7.595	5.831	2.4805	2.362	53.9685	72.9295	6.63131	30.495	2
V418	V73	GZ63	13.8755	3.09167	78.7103	10.87	6.64	3.4365	1.939	58.2452	66.9808	7.16968	26.6	1.875
V419	V74	GZ63	17.825	3.19167	79.0633	13.8734	6.34575	3.10175	2.066	54.9927	67.2256	7.40089	39.0575	2.4375
V420	V75	GZ63	22.827	3.29167	79.5263	15.62	6.0515	2.767	2.193	51.0766	67.5161	7.4983	51.515	3
V421	V76	GZ63	24.3055	2.34167	79.6872	15.79	6.214	2.899	2.1505	50.1938	67.5761	6.70323	50.285	3
V422	V77	GZ63	22.928	2.78125	80.1151	16.63	6.0515	2.6245	2.3115	44.2008	67.3838	8.0691	52.435	3
V423	V78	GZ63	12.615	2.85	79.6492	13.715	6.8565	3.2855	2.0925	38.6898	65.9482	6.8361	40.385	2
V424	V79	GZ63	16.6795	5.05	79.7039	4.685	6.808	3.1335	2.1795	58.5157	66.3873	6.88251	17.25	1
V425	V80	GZ63	22.0855	4.63333	79.6461	17.855	6.0695	2.8205	2.158	51.6621	66.731	7.53869	61.695	2
V426	V81	GZ63	19.5018	3.53757	74.1407	34.8968	5.47523	2.74186	2.02601	48.5209	58.4665	10.2257	77.477	3.25
V427	V82	GZ63	16.918	2.63333	68.6869	45.24	5.1685	2.713	1.911	47.1717	50.202	12.4266	83.78	4
V428	V83	GZ63	20.5505	2.525	79.2987	5.215	6.236	2.763	2.261	50.6815	67.9698	7.42601	19.92	2
V429	V84	GZ63	21.433	3.37708	80.7328	10.0825	6.32257	2.97431	2.147	54.9958	68.6108	6.63868	35.1275	2.0625
V430	V85	GZ63	21.7545	4.22917	81.2035	14.95	6.376	3.1485	2.033	57.8496	68.7987	6.37423	50.335	2.125
V431	V86	GZ63	21.0422	4.22629	81.098	12.9867	6.47997	3.14874	2.04097	58.2644	68.5493	6.53945	43.8084	2.02734
V432	V87	GZ63	19.4752	4.2163	80.8154	8.6675	6.60564	3.14889	2.06429	58.4363	68.0004	6.90293	29.45	1.8125
V433	V88	GZ63	17.9083	4.19711	80.4064	4.34828	6.71149	3.14897	2.10209	58.6204	67.4516	7.2664	15.0916	1.59766
V434	V89	GZ63	17.196	4.16667	79.9216	2.385	6.756	3.149	2.1535	59.072	67.2021	7.43162	8.565	1.5
V435	V90	GZ63	18.6005	3.79167	79.0988	6.38	5.925	2.58	2.304	62.3524	67.9668	7.29752	33.055	1.5
V436	V91	GZ63	16.254	2.975	80.1961	1.69	6.6875	3.262	2.0555	60.3922	66.2745	6.64453	6.72	1
V437	V92	GZ63	16.285	2.78333	79.3364	2.645	7.0335	3.2335	2.182	60.4298	66.2778	5.96299	9.39	1
V438	V93	GZ63	13.504	3.05	79.0606	4.75	6.5535	3.349	1.9655	53.4164	68.093	7.84518	17.48	2
V439	V94	GZ63	13.866	2.7875	80.0192	9.53455	6.66012	3.25475	2.06625	54.0619	68.0804	7.5299	30.7854	2
V440	V95	GZ63	14.228	2.525	80.9778	12.975	6.824	3.1605	2.167	54.7075	68.0364	7.17811	39.505	2
V441	V96	GZ63	13.886	2.93333	78.861	9.515	6.926	3.2785	2.1195	46.7825	64.9614	7.13315	33.295	2
V442	V97	GZ63	15.9288	2.87514	76.7027	26.7625	6.13725	3.00025	2.03111	48.0948	62.5195	9.96697	59.1025	3
V443	V98	GZ63	17.9715	2.75	75.4941	44.01	5.3485	2.722	1.971	49.4071	61.2648	12.8008	84.91	4
V444	V99	GZ63	17.0739	2.52348	77.2585	43.0749	5.83954	2.88229	2.03125	39.1139	63.4783	10.106	80.0725	3.61293
V445	V100	GZ63	15.3275	2.25333	79.0229	40.105	6.567	3.15	2.0915	28.8207	65.6919	7.28759	67.775	2.875
V446	V101	GZ63	13.13	2.05	76.1323	9.42	6.968	3.3655	2.077	45.2626	63.4066	7.14444	31.1	2
V447	V102	GZ63	19.188	2.70833	79.3814	19.345	6.7205	3.4655	1.9495	45.6701	53.8144	8.70343	51.52	2.125
V448	V103	GZ63	11.859	2.33333	77.8424	6.55	6.6985	3.268	2.0555	45.8175	64.701	7.78256	22.105	2
V449	V104	GZ63	15.967	2.34375	80.3146	8.04	6.9475	3.292	2.116	54.7743	66.6085	5.98422	28.355	2
V450	V105	GZ63	21.399	2.60833	79.8846	19.38	6.4995	3.2915	1.98	55.0676	66.1	7.20973	53.54	3
V451	V106	GZ63	15.725	4.39167	77.5591	8.38	6.894	3.3885	2.043	57.4803	66.5354	7.92148	27.275	2
V452	V107	GZ63	11.257	2.00833	78.6275	16.19	6.74	3.401	1.987	44.0569	64.5098	7.00424	44.985	3
V453	V108	GZ63	11.965	2.35	78.3177	19.44	6.6775	3.4055	1.967	48.2437	64.258	6.98986	50.64	2.75
V454	V109	GZ63	12.1135	2.34167	78.8376	12.73	6.6585	3.4525	1.9355	48.8047	64.8588	6.73093	35.07	2.5
V455	V110	GZ63	15.4995	2.50833	79.2228	9.68	6.625	3.175	2.0945	47.7664	65.8259	6.92058	33.045	2
V456	V111	GZ63	14.563	2.80833	77.5147	11.905	6.5695	3.2185	2.0475	48.7126	64.3001	6.92681	40.385	2
V457	V112	GZ63	12.072	3.125	78.7109	27.12	6.568	3.2635	2.02	41.7969	65.0391	7.47302	51.565	2.125
V458	V113	GZ63	10.7245	2.28125	78.125	29.555	6.3525	3.174	2.0135	59.0625	59.375	10.921	72.735	3
V459	V114	GZ63	12.919	3.38333	78.6548	7.505	6.509	3.4745	1.8825	43.4747	65.8066	6.75494	25.475	2
V460	V115	GZ63	16.3299	3.33006	79.3431	4.78875	6.86275	3.15475	2.18363	55.2679	67.2528	6.66403	16.41	1.75
V461	V1	PA64	24.83	2.37037	78.2118	51.17	5.5905	2.4925	2.249	45.7181	64.5	7.8356	92.4	3.5
V464	V4	PA64	26.048	2.56667	79.9646	15.035	5.705	2.5495	2.2405	53.8329	68.2	7.01243	54.69	2.875
V465	V5	PA64	25.5253	2.29583	80.1268	12.7906	5.6525	2.48575	2.27775	57.4721	68.6312	6.338	49.59	2.56775
V466	V6	PA64	24.3385	2.025	80.1964	11.875	5.6	2.422	2.315	59.7002	68.8231	5.85428	45.325	2.25
V467	V7	PA64	21.953	2.18333	78.9765	13.095	6.5005	3.331	1.9575	57.8469	66.9883	7.24043	40.135	2
V468	V8	PA64	25.0045	2.40833	80.4095	50.465	5.6675	2.487	2.283	39.0444	65.4958	7.37417	90.515	4
V469	V9	PA64	25.4425	2.04167	80.3137	25.755	5.6305	2.535	2.224	53.4484	68.2203	6.25267	72.76	3
V470	V10	PA64	20.917	2.83333	79.8869	22.25	5.463	2.49	2.197	47.865	67.785	7.00584	63.155	3
V471	V11	PA64	23.9225	2.70833	76.7352	54.555	4.898	1.9225	2.5595	40.5171	63.3217	8.09294	94.9	5
V472	V12	PA64	24.3165	6.15	77.8234	12.565	6.147	3.0805	2	58.023	67.25	7.10579	31.07	2
V473	V13	PA64	24.6015	2.15833	78.8001	17.25	5.5665	2.6955	2.0695	58.9454	66.731	6.52371	47.705	3.5
V474	V14	PA64	24.487	2.58333	79.6447	4.72	5.3705	2.5145	2.1395	55.0794	68.9742	7.94721	19.515	1.875
V475	V15	PA64	21.915	3.6	78.7144	24.405	5.948	2.6225	2.2725	53.4222	67.15	6.90733	64.52	2.875
V476	V16	PA64	21.4375	2.825	80.1176	19.025	5.9125	2.544	2.3305	42.7926	67.925	7.91974	71.32	2
V477	V17	PA64	25.089	2.09167	78.5426	28.81	5.6755	2.678	2.1235	53.9319	65.9471	7.23345	70.77	4
V478	V18	PA64	23.8365	2.93833	80.6645	20.495	5.648	2.7605	2.051	60.3487	68.9441	7.8695	54.715	3
V479	V19	PA64	25.164	2.4	80.08	24.055	5.503	2.5475	2.1625	50.7293	70.2	6.60925	65.465	4
V480	V20	PA64	24.057	3.60833	80.1964	19.675	6.036	3.196	1.893	56.7061	70.0255	7.51851	55.76	3
V481	V21	PA64	23.358	2.01667	79.4145	14.86	6.3265	3.387	1.8735	50.7896	67.5751	6.97978	44.915	2
V482	V22	PA64	19.1175	2.00833	78.4469	12.26	6.005	3.2495	1.854	61.4504	66.7956	7.51121	35.325	2
V483	V23	PA64	19.4035	2.33333	78.672	17.455	6.4495	3.2375	1.9975	43.99	65.5634	6.84915	55.035	2.75
V484	V24	PA64	20.288	2.36667	75.1517	12.59	6.1285	3.2185	1.91	54.5772	63.9978	7.41532	38.93	2
V485	V25	PA64	17.541	2.49167	75.2309	35.515	5.2485	2.6645	1.976	36.7537	59.7	12.5126	75.165	3.875
V486	V26	PA64	18.8265	3.14667	76.5625	16.815	6.14	3.213	1.916	39.2773	64.7	8.26299	41.425	2.5
V487	V27	PA64	16.06	2.91667	79.262	13.355	6.435	3.2295	1.999	49.5749	65.9516	7.74223	37.375	2.25
V488	V28	PA64	8.728	2.425	76.5297	14.305	5.5285	2.89	1.917	56.7467	65.6788	8.92154	37.56	3
V489	V29	PA64	18.1075	2.25833	78.0813	11.735	6.182	2.983	2.0775	57.8074	68.2973	7.34148	33	2
V490	V30	PA64	19.5665	3.01667	78.908	6.04	6.633	3.168	2.102	59.0744	66.801	7.84781	21.095	1.875
V491	V31	PA64	21.382	2.73333	79.572	28.625	5.5945	2.483	2.2565	62.623	67.3152	8.18272	83.44	3
V492	V32	PA64	19.6125	2.21	78.2353	18.62	6.189	3.3275	1.8655	52.9412	66.8627	7.68323	47.35	2
V493	V33	PA64	17.9165	2.975	77.6125	17.99	5.705	2.9395	1.9455	45.3516	66.2778	8.37419	44.01	2.125
V494	V34	PA64	21.702	2.78333	79.6443	14.37	6.467	3.255	1.9935	60.4545	67.9842	7.82343	50.045	2
V495	V35	PA64	19.8905	2.15	78.3624	18.115	5.709	2.7285	2.098	51.5548	67.0515	8.53204	54.035	3
V496	V36	PA64	23.088	2.75833	79.2	9.06	5.783	2.515	2.3055	53.6455	68.3644	8.37081	42.175	2
V497	V37	PA64	23.247	2.84167	78.8668	19.715	5.639	2.4675	2.289	56.6884	68.2906	8.76238	65.44	3
V498	V38	PA64	21.701	3.01667	79.6535	9.49	5.913	2.6435	2.242	49.9012	68.0968	6.83489	39.09	2
V499	V39	PA64	12.4675	2.73333	79.2794	20.295	5.873	2.6865	2.1915	46.6143	70.85	8.03118	51.21	3
V500	V40	PA64	12.654	3.01667	75.5871	6.45	6.2455	3.0265	2.071	30.7107	65.4511	7.90849	19.415	2.125
V501	V41	PA64	15.3615	3.00833	78.7551	12.3	6.632	3.1645	2.1035	42.8725	65.8824	7.60086	42.935	2
V502	V42	PA64	21.2285	2.09167	79.0115	6.185	6.417	3.229	1.9925	57.0317	67.7205	7.19698	20.285	1.875
V503	V43	PA64	23.9095	2.625	78.043	14.75	5.659	2.43	2.333	50.498	68.2122	6.47828	48.515	3
V504	V44	PA64	24.082	2.98333	80.0686	18.695	6.387	3.112	2.0335	56.0609	69.8302	8.59126	61.535	3
V505	V45	PA64	23.7225	2.39167	78.8578	18.775	5.6575	2.4855	2.281	48.9141	66.5031	6.73694	60.68	3
V506	V46	PA64	24.7387	2.39037	79.0993	19.6993	5.52115	2.50361	2.22225	49.957	66.5795	6.47825	61.0806	2.75
V507	V47	PA64	25.755	2.39	79.6	22.22	5.474	2.5345	2.1635	51	66.8	6.39295	62.34	2.5
V508	V48	PA64	17.7995	2.96667	80.3595	35.405	5.785	2.561	2.2625	49.4982	67.9675	7.88835	74.225	3.875
V509	V49	PA64	25.518	2.84	80.9793	31.505	5.5065	2.418	2.2815	54.3153	67.8396	7.04913	88.685	4
V510	V50	PA64	24.661	2.65067	81.0898	41.18	5.653	2.543	2.2265	49.1124	66.4683	6.8443	90.28	4
V511	V51	PA64	21.3995	3.28333	78.4841	17.83	6.213	2.7065	2.301	49.75	68	7.11797	54.175	3.5
V512	V52	PA64	24.7655	3.73958	80.3475	13.995	5.6045	2.9595	1.8985	59.3297	68.1629	8.47151	44.52	3
V513	V53	PA64	21.139	2.10833	80.0784	13.84	6.442	3.424	1.887	56.0137	66.8653	7.41732	39.4	2
V514	V54	PA64	25.966	2.23333	81.2882	21.26	6.162	2.932	2.107	50.0958	68.9045	7.53533	61.185	3
V515	V55	PA64	14.8335	2.01667	80.4752	16.92	6.672	3.2685	2.047	54.568	68.4417	7.72783	47.97	2
V516	V56	PA64	22.903	2.89167	75.2968	41.335	6.873	3.1905	2.162	42.7286	61.9524	6.98152	93.815	2
V517	V57	PA64	12.3785	2.7	79.1638	17.63	6.7165	2.9515	2.2815	45.4346	67.8551	7.83983	62.265	3
V518	V58	PA64	24.4055	2.1	79.9202	23.285	5.653	2.56	2.2115	55.7008	68.7399	6.99167	70.23	3
V519	V59	PA64	24.1944	2.15833	79.1764	21.4236	5.94447	2.70162	2.16901	56.8313	68.6942	6.5464	65.4572	2.5
V520	V60	PA64	23.5735	2.21667	78.4326	18.22	6.2715	2.9735	2.114	57.6839	68.5457	6.34698	56.26	2
V521	V61	PA64	19.9125	2.15833	79.5692	15.4	6.3155	3.3025	1.918	59.9167	66.6375	7.39027	45.01	2
V522	V62	PA64	24.2355	2.225	79.1732	36.82	5.4025	2.435	2.2235	51.1324	67.6614	7.45722	84.515	3.75
V523	V63	PA64	24.0035	2.23333	79.2228	36.62	5.556	2.481	2.242	45.1456	64.8539	7.49122	80.72	4
V524	V64	PA64	17.7595	2.61111	78.8732	14.405	5.8315	2.7065	2.161	56.338	70.4225	8.7175	39.98	2.5
V525	V65	PA64	12.714	3.34167	78.8526	5.355	6.4335	3.22	2.004	63.7917	65.85	7.48503	19.735	2
V526	V66	PA64	24.289	2.16667	80.2351	16.5	5.827	2.7755	2.103	65.0078	68.4934	6.76578	50.755	2
V527	V67	PA64	21.6655	2.20833	79.8439	9.975	6.268	3.036	2.0685	56.9047	67.7127	6.5632	35.635	2
V528	V68	PA64	19.4795	2.425	79.2495	28.255	5.8495	2.838	2.0655	41.2724	64.9381	7.55471	63.34	4
V529	V69	PA64	24.0235	2.375	80.0385	14.635	6.28	3.005	2.0945	52.2442	67.319	7.18584	45.88	2.125
V530	V70	PA64	18.4085	2.30833	79.3327	21.455	6.382	3.196	2.002	49.798	69.0948	7.09	59.38	3
V531	V71	PA64	19.619	2.5	77.7	30.525	6.065	2.8045	2.1675	46.1236	65.7677	7.43549	84.325	4
V532	V72	PA64	24.675	2.00833	79.5685	14.115	5.4925	2.3525	2.3385	54.3622	68.7633	6.35898	43.915	2.5
V533	V73	PA64	22.9465	3.01458	79.6937	4.915	6.1405	2.8905	2.1295	57.5039	69.1656	8.45628	16.32	2
V534	V74	PA64	23.9065	2.525	77.3871	49.605	5.898	2.554	2.3155	50.4902	63.3584	7.62215	96.61	4
V535	V75	PA64	26.294	3.025	78.7938	28.765	5.748	2.6825	2.1475	49.9502	66.1479	7.02159	72.705	4
V536	V76	PA64	23.145	2.325	80.7772	16.155	6.397	3.4365	1.866	54.8344	68.8203	8.18938	45.52	2
V537	V77	PA64	25.533	2.85	80.4305	15.64	5.721	2.466	2.3235	61.1175	69.0801	8.34401	54.78	2.875
V538	V78	PA64	19.6475	2.37433	81.1843	22.535	6.5105	3.2015	2.0385	49.1176	68.3255	7.52119	63.295	3
V539	V79	PA64	25.3795	2.29167	80.2776	32.33	5.697	2.7405	2.0845	39.2518	64.6938	5.6887	74.54	3.75
V540	V80	PA64	22.5625	2.68833	79.2904	27.8	5.7845	2.683	2.16	55.028	67.05	7.20495	75.635	3.875
V541	V81	PA64	21.083	2.52857	80.0407	33.445	5.8925	2.451	2.409	57.923	66.9299	7.2684	75.34	3.25
V542	V82	PA64	22.3995	3.08333	79.4168	19.78	5.7635	2.9695	1.9455	56.6453	67.5728	7.40255	61.875	2.875
V543	V83	PA64	23.083	2.63333	79.2555	12.8	5.8475	2.7515	2.1295	59.7267	66.3411	7.43868	46.725	2
V544	V84	PA64	22.6	2.73452	79.5263	12.26	6.5665	3.299	1.996	53.1331	68.025	7.94237	39.975	2
V545	V85	PA64	24.352	2.60933	80.1965	15.685	6.146	3.119	1.976	63.1971	68.4301	6.59563	44.41	2.125
V546	V86	PA64	24.314	2.40833	80.8683	12.62	5.627	2.4635	2.288	57.9667	68.2493	6.54039	43.385	2.5
V547	V87	PA64	21.623	2.65833	80.4706	17.605	6.3645	3.5445	1.803	49.7606	66.7969	7.0791	49.18	3
V548	V88	PA64	20.9243	3.2561	79.8099	10.8125	6.52034	3.41489	1.923	51.4753	66.8795	6.90428	32.9625	2.625
V549	V89	PA64	20.666	3.69167	79.3756	4.02	6.5755	3.113	2.1165	55.2522	67.1179	6.72946	16.745	2
V550	V90	PA64	22.9645	2.63333	79.8431	5.565	5.52	2.4535	2.2565	62.1461	68.3774	7.18083	20.165	1.5
V551	V91	PA64	19.25	2.60833	78.854	8.54	6.554	3.288	1.998	61.8757	67.7924	8.30786	26.745	2
V552	V92	PA64	19.78	2.71667	80.5126	4.505	6.6465	3.196	2.085	65.1172	68.8156	7.20232	17.84	1
V553	V93	PA64	17.3235	2.2	79.7686	12.84	6.233	3.374	1.853	55.7109	67.9897	7.48871	37.185	2
V554	V94	PA64	21.4305	2.675	79.0611	23.92	6.7035	3.3175	2.0275	45.2105	67.9858	7.24846	58.775	3
V555	V95	PA64	21.4655	2.55	81.1512	23.2	6.6075	3.191	2.0765	54.9	65.6677	7.61799	59.17	3
V556	V96	PA64	20.722	2.03733	79.029	13.28	6.6975	3.2795	2.0475	48.4248	65.4375	6.89202	41.685	3
V557	V97	PA64	21.646	2.73333	78.8114	27.235	6.619	3.2815	2.0235	36.9223	65.942	7.55824	67.735	3
V558	V98	PA64	22.019	2.46667	79.6448	28.815	6.4865	3.112	2.09	45.7283	65.9456	7.40371	68.685	3
V559	V99	PA64	21.078	2.175	79.1687	14.835	6.1605	3.2205	1.919	59.3805	68.6897	6.89046	39.44	2.875
V560	V100	PA64	22.615	2.39167	79.7252	19.51	6.547	3.1425	2.088	44.0577	67.2522	7.12066	56.63	3
V561	V101	PA64	21.316	2.55	78.279	16.315	6.733	3.3165	2.0365	57.4656	66.65	7.60186	50.32	2
V562	V102	PA64	20.1325	2.05	77.6483	12.245	6.6985	3.414	1.9685	38.9882	66.0771	7.98404	38.5	2
V563	V103	PA64	21.003	2.175	78.8252	12.125	6.5505	3.285	2.0005	56.7558	66.8743	8.03862	39.205	2
V564	V104	PA64	22.1455	2.1	79.6477	11.935	6.6125	3.2895	2.0155	53.5531	66.7318	4.21069	41.125	2.125
V565	V105	PA64	23.2935	2.86667	79.1506	23.615	6.3045	3.093	2.0435	48.2625	67.9537	9.47705	57.305	3
V566	V106	PA64	22.249	2.06667	79.0298	20.42	6.872	3.4195	2.015	47.4566	65.8251	6.70032	55.65	2.875
V567	V107	PA64	20.2805	2.09167	79.9988	21.35	6.441	3.266	1.979	47.2154	66.2755	7.7226	58.355	3
V568	V108	PA64	21.8165	2.29167	78.5859	21.48	6.611	3.3005	2.0095	49.3129	65.4258	8.0187	59.19	3
V569	V109	PA64	19.214	2.20833	81.1036	18.915	6.6565	3.428	1.948	42.8725	66.8333	8.02815	52.1	2.25
V570	V110	PA64	21.8485	2.61667	78.9779	19.56	6.3745	3.141	2.034	48.8594	66.012	7.26395	55.735	3
V571	V111	PA64	21.961	2.85	79.9225	21.55	6.2935	3.2005	1.9725	51.2402	66.3404	7.21797	55.54	2
V572	V112	PA64	21.502	2.34722	80.3556	26.755	6.551	3.246	2.023	42.8409	65.8159	7.03093	66.5	3
V573	V113	PA64	20.9875	2.31667	80.0778	17.26	6.0525	3.136	1.934	59.4961	66.7979	9.31791	47.46	3
V574	V114	PA64	13.0175	2.36667	78.7402	13.375	6.668	3.4345	1.9505	44.8819	62.9921	7.16177	40.955	2
V575	V115	PA64	20.6786	2.91	78.6906	11.9288	6.45775	3.13238	2.06763	59.7722	66.6106	6.99987	36.4688	2.25

## Sheet: Table S5(H)
taxa	P1	P2	AC	ASV	BRR	CD	GL	GLWR	GW	HRR	MRR	PC	PGWC	TD
V1	V1	AS	3.582	0.0375	0.348043	-6.1	0.045	0.08	-0.06975	6.49553	1.20585	-1.53931	17.525	0.75
V4	V4	AS	-4.643	-0.0212963	1.05326	-23.9625	0.264	0.1635	-0.04825	27.9066	4.58894	-2.65786	-5.935	-1
V5	V5	AS	0.14475	-0.191667	1.50965	-21.2875	0.55725	0.51275	-0.261	27.2658	2.60344	-3.13944	-22.625	-1.25
V6	V6	AS	3.315	-0.0166667	-0.173403	-23.505	0.13225	0.13575	-0.09875	14.6981	0.772848	-3.79209	-22.79	-1
V7	V7	AS	2.655	-0.441667	2.26933	-11.96	0.2765	0.24975	-0.086	10.8143	2.7902	-2.31167	-20.345	-0.25
V8	V8	AS	1.34025	-0.65	1.57199	4.7525	-0.03775	0.08325	-0.1145	24.3143	4.11895	-1.62109	33.68	1.75
V9	V9	AS	1.995	-0.533333	1.38088	-20.1	0.18	0.1455	-0.07825	25.7301	4.31214	-2.18576	-5.52	-1.25
V10	V10	AS	-0.767	-1.01667	0.355847	2.965	0.06825	0.12175	-0.09525	12.1472	0.393527	-1.58795	7.655	-0.25
V11	V11	AS	3.3885	-0.0916667	1.83443	-28.7725	0.2905	0.24225	-0.146	25.3887	3.00054	-1.87875	-10.9825	0.625
V12	V12	AS	-3.22325	-0.316667	8.25348	30.8025	-1.0695	-0.27775	-0.191	8.77304	-26.3701	4.58274	53.225	1.25
V13	V13	AS	3.219	-0.3	1.37882	-21.275	0.00175	0.11075	-0.08525	27.2919	2.29078	-1.83713	-20.2825	-0.25
V14	V14	AS	4.26225	0.295833	2.71295	0.3025	-0.001	0.04975	-0.0485	30.5046	2.89132	-1.7331	3.22	-0.25
V15	V15	AS	6.798	-0.391667	1.24215	-7.2725	-0.0345	-0.0405	0.0195	25.5567	1.25672	-1.25726	32.1075	0.75
V16	V16	AS	6.2115	0.216667	1.59038	-3.1275	-0.015	-0.0505	0.034	20.1002	0.0736727	0.0194577	34.44	-0.125
V17	V17	AS	3.01925	-0.595833	1.85115	-28.22	0.184	0.14375	-0.052	21.0943	2.85104	1.30839	-19.285	-0.25
V18	V18	AS	7.546	-0.0166667	2.69728	0.1575	-0.01525	0.13375	-0.1055	22.7365	2.80496	-1.06611	8.46	0.25
V19	V19	AS	7.65924	0.563881	1.99534	4.55691	0.00054588	0.0711053	-0.0696863	17.3586	2.0404	-1.80612	13.2183	0.00925926
V20	V20	AS	7.53291	1.12408	1.34486	4.80406	0.0542265	0.0272084	-0.0397554	11.9818	0.987179	-1.92117	12.375	-0.00925926
V21	V21	AS	-2.14075	-0.975	1.66454	3.955	0.19975	0.22375	-0.105	12.674	0.540464	-1.61878	9.46	0.25
V22	V22	AS	-1.00725	-0.754167	1.55677	-3.6575	-0.035	0.053	-0.07325	19.2783	1.63853	-1.46089	-9.065	-0.75
V23	V23	AS	-1.22962	-0.246802	-2.37549	-7.56457	-0.2545	0.1045	-0.16402	28.4972	2.00237	-0.958292	-18.0166	-0.5
V24	V24	AS	-0.3315	0.233333	-4.02635	0.695	0.1575	0.22225	-0.105	24.1071	1.95139	-1.18115	0.8575	-0.75
V25	V25	AS	1.6305	-1.35833	-0.0347606	10.69	-0.036	0.11875	-0.10075	11.0453	1.33962	-1.17288	22.62	-1
V26	V26	AS	-0.43325	-1e-08	1.67319	1.925	0.10925	0.156	-0.082	33.5882	-0.394169	-1.72437	7.3675	-0.875
V27	V27	AS	-1.0405	-0.208333	1.69232	-2.175	0.10425	0.221	-0.12125	34.3847	0.977468	-1.34911	-6.49	-0.75
V28	V28	AS	-2.09275	-0.804167	1.16101	-1.4725	-0.0045	0.09425	-0.0715	18.9062	2.54923	0.104282	-4.3725	-0.25
V29	V29	AS	3.88975	0.225	1.7048	9.83	0.27	0.35025	-0.16225	30.1733	1.72553	-0.345336	23.4575	0.125
V30	V30	AS	-0.32775	1.6125	0.410994	-0.5975	0.37075	0.1595	0.00375	28.5763	0.982817	-1.69177	1.0625	-1.625
V31	V31	AS	1.16475	-0.1625	0.787193	-11.3425	0.0635	0.09475	-0.07575	20.8836	2.74433	0.727538	9.095	-0.25
V32	V32	AS	-2.311	0.204167	-2.11426	-0.3175	0.13225	0.161	-0.07925	0.945453	1.02423	0.959389	12.47	1
V33	V33	AS	0.38425	-1.525	0.58613	3.31	0.1225	0.09925	-0.039	18.1092	0.279276	-1.59376	12.38	0.125
V34	V34	AS	2.47125	0.366667	0.719218	-4.8175	0.303	0.1275	-0.00775	23.4325	2.19809	-1.89916	-9.0275	-0.25
V35	V35	AS	1.8868	-0.52037	-1.97921	-14.8715	-0.28	-0.167093	-0.0615449	0.434951	1.83273	-1.92346	-22.333	0.75
V36	V36	AS	1.50629	-1.40463	0.305693	-20.212	0.097	0.194093	-0.2018	-1.75378	4.51377	-3.28828	-11.7282	0.75
V37	V37	AS	2.4335	0.25	1.64353	-22.9525	0.39	0.2685	-0.136	25.0197	4.20516	-3.66999	-0.235	0.5
V38	V38	AS	8.022	-0.475	0.506249	-5.25	-0.138	-0.14075	0.06625	26.5176	0.423449	-1.59703	29.405	0.75
V39	V39	AS	2.39275	-0.283333	3.13962	-18.6	-0.09	0.03875	-0.06625	19.0109	2.08333	-0.36864	-13.8325	1.25
V40	V40	AS	4.40125	0.075	0.515934	-14.4825	0.2415	0.33925	-0.15075	18.0921	0.694644	-1.16546	-8.19	0.25
V41	V41	AS	-0.30975	0.420833	0.851443	-11.59	0.2115	0.2345	-0.0965	11.1827	2.11809	-0.112261	-19.445	-0.375
V42	V42	AS	11.3102	-0.195833	-1.67939	19.2175	-1.2545	-0.96125	0.398	12.5206	0.0904669	-1.71882	49.32	3.125
V43	V43	AS	6.6335	-0.76875	1.0058	-6.72375	-0.384365	-0.419088	0.188919	17.9375	4.01511	-3.4358	12.6056	1.16827
V44	V44	AS	4.44775	-0.516667	3.86324	17.36	0.57425	0.296	-0.02725	9.76879	4.70562	-1.42128	45.4575	1.5
V45	V45	AS	4.70575	-0.258333	3.37644	-17.7975	0.055	0.1395	-0.12375	23.5309	5.53623	-2.67792	10.5875	1.25
V46	V46	AS	13.5218	-0.216667	4.32409	-12.6875	-0.44275	-0.34025	0.0925	2.0306	3.46538	-1.297	20.7875	2.125
V47	V47	AS	2.8625	0.354167	-0.454311	-9.01	0.06425	0.127	-0.101	21.8436	1.54456	-1.57588	25.22	1.25
V48	V48	AS	0.39425	0.55	2.3994	-14.285	0.00225	0.18675	-0.17475	15.3412	2.72158	-0.148379	-1.805	1.25
V49	V49	AS	4.90925	0.331667	0.838895	8.4975	0.06625	0.13425	-0.13125	13.0391	-0.813157	-2.43738	39.2225	1
V50	V50	AS	5.52725	-0.495833	4.15277	-1.0725	0.04125	0.17025	-0.1525	31.6216	3.04556	-0.548187	31.115	1.75
V51	V51	AS	-2.79725	0.0458333	3.2296	-19.7025	0.58625	0.68225	-0.3255	29.5719	3.80332	-1.26345	-19.6825	-0.5
V52	V52	AS	-2.207	-0.8	1.18065	28.04	-0.4215	-0.244	0.01175	28.3501	-2.09658	2.8342	48.0925	1.75
V53	V53	AS	5.17025	-0.7	4.22489	4.4475	0.135	0.12325	-0.0705	25.9405	2.02252	-1.4177	13.35	-0.25
V54	V54	AS	0.68375	-0.0333333	2.3859	-13.2475	0.34825	0.24525	-0.06575	25.9328	4.43066	-1.31317	1.6475	0.25
V55	V55	AS	-4.96525	-0.791667	0.835675	-17.8925	0.469	0.3125	-0.06475	24.5092	2.06633	-1.22696	-23.57	-0.25
V56	V56	AS	2.18675	1.53333	2.22196	-5.8675	0.0365	0.19975	-0.12875	29.4005	3.2364	-0.483491	29.8	1.25
V57	V57	AS	-7.8435	-1.14167	-0.261243	6.1825	-0.02775	0.10725	-0.0905	31.6947	0.75804	-1.08314	14.93	0.75
V58	V58	AS	1.5605	-1.01667	2.97299	-12.5825	0.155	0.19775	-0.11475	21.4075	1.75697	-2.41717	10.945	0
V59	V59	AS	1.2265	1.12917	-0.388012	-6.6825	-0.0035	-0.06475	0.05375	20.6263	3.11529	0.591094	-19.41	-0.75
V60	V60	AS	4.19175	-0.566667	2.11672	1.5225	0.17925	0.2295	-0.103	31.7584	2.9465	-2.0792	7.3575	0
V61	V61	AS	4.54575	-0.958333	2.73381	0.5975	-0.00825	0.12325	-0.09625	14.2272	1.57856	-1.59484	-1.5025	-0.75
V62	V62	AS	5.3283	-0.243384	2.85052	0.791265	-0.296052	-0.182949	0.024375	16.1631	4.21435	-0.895551	13.9318	1
V63	V63	AS	2.867	-0.683333	1.46546	29.3325	-0.1065	0.07575	-0.1185	6.32979	0.551731	-0.4928	44.95	-0.25
V64	V64	AS	1.91075	-0.55	1.01241	-15.1075	0.064	0.11725	-0.0785	6.07603	3.05298	-0.588819	-6.81	0.25
V65	V65	AS	4.18375	-0.9	3.08721	-17.8375	0.143	0.027	0.02675	20.316	5.66518	-1.40253	-17.095	-0.25
V66	V66	AS	2.50695	-0.813557	3.44364	-19.6769	0.238674	0.128301	-0.0127045	29.6338	3.3115	-2.64587	-17.4737	0.25
V67	V67	AS	3.79575	-0.733333	3.65892	-17.8675	0.13375	0.11675	-0.04025	35.2802	3.53124	-2.6285	-16.0475	0.25
V68	V68	AS	-0.85525	-0.3	1.8588	-19.67	0.34075	0.358	-0.143	11.6886	3.91752	-0.930464	-12.64	1
V69	V69	AS	-5.87406	-0.60397	2.20305	-20.96	0.520645	0.565233	-0.23975	14.7292	2.82532	-1.47499	-20.68	0.125
V70	V70	AS	0.57	-0.416667	1.56083	1.7425	0.42275	0.28475	-0.059	13.7269	0.58463	-0.825641	6.4425	-0.25
V71	V71	AS	2.68675	-0.7875	1.85964	-15.0625	0.24225	0.2325	-0.10575	12.5779	2.87502	-2.28474	11.135	0
V72	V72	AS	3.12275	0.0166666	1.18476	-5.395	0.13525	0.1235	-0.08825	20.4079	3.7635	-1.61057	4.51	0.375
V73	V73	AS	3.205	-0.1625	1.7468	-7.5175	-0.44725	-0.095	-0.09225	18.6542	3.02381	-0.539277	9.5925	0.25
V74	V74	AS	3.194	-0.00416669	0.724142	0.5025	0.14275	0.0795	-0.03275	13.5457	1.46745	-0.170481	33.57	1.75
V75	V75	AS	4.4605	-0.433333	3.28654	-13.8375	0.028	0.10925	-0.08575	14.0133	3.90175	-1.92085	12.205	0.5
V76	V76	AS	6.759	-0.578586	1.8463	-3.7225	-0.248097	-0.16225	0.04125	20.8318	2.78318	-1.85397	18.9141	0.75
V77	V77	AS	7.35386	-0.623331	2.66686	-2.76181	-0.271576	-0.222039	0.079375	27.2296	3.09121	-1.67531	17.725	0.75
V78	V78	AS	-4.565	0.0208333	2.20417	-10.5475	0.39475	0.37875	-0.1365	4.63487	1.12621	-1.97667	-7.78	-0.25
V79	V79	AS	0.99775	-0.175	1.38596	1.5525	0.26425	0.2125	-0.064	26.6565	1.6078	-2.04263	8.23	-0.75
V80	V80	AS	7.09125	-2.5	2.08917	26.655	-0.18425	0.08975	-0.142	14.2222	-1.32122	-2.69391	46.455	1.5
V81	V81	AS	2.598	1.35	1.77741	-28.7975	-0.38875	-0.10675	-0.08325	34.3479	4.48194	-2.5463	-44.8925	-2
V82	V82	AS	1.98975	-0.408333	0.0648835	1.9025	-0.04575	0.137	-0.115	25.5983	-1.11444	-1.48446	6.975	-0.75
V83	V83	AS	3.29275	-0.579167	1.51153	-6.9325	-0.15525	0.06175	-0.10675	21.8658	2.22781	-1.34305	-8.85	-0.5
V84	V84	AS	3.72	-0.277757	2.2878	-7.71005	0.339898	0.385625	-0.157375	23.9199	2.24334	-0.643964	-10.3617	-0.5
V85	V85	AS	2.44225	-0.333333	2.99781	1.4575	0.1995	0.2165	-0.0855	16.3042	3.07417	-2.55396	10.235	0
V86	V86	AS	3.14	-0.466667	0.153209	-16.65	0.09875	0.15825	-0.1225	30.7414	1.27237	-1.56959	-11.145	-1.25
V87	V87	AS	0.3585	0.8875	-0.507349	-9.655	0.41325	0.25725	-0.0665	24.6763	0.815838	-2.22405	-5.9725	0.25
V88	V88	AS	1.022	0.258333	3.03001	-10.075	0.31025	0.15875	-0.02125	32.3563	4.25754	-2.25302	-14.47	-0.25
V89	V89	AS	0.52	0.216667	1.76335	1.5675	0.2575	0.18375	-0.04775	29.9631	3.49007	-1.78668	1.0925	0.5
V90	V90	AS	2.87425	0.179167	1.37204	-7.2325	0.068	0.0655	-0.0445	19.9364	3.91899	-1.31717	-15.49	-0.25
V91	V91	AS	1.9765	-0.0449074	3.19627	-5.225	0.06325	0.17825	-0.10575	36.4229	3.45973	-2.22628	-9.35	-0.25
V92	V92	AS	0.76425	1.07917	0.725015	-1.0825	0.25825	0.17	-0.03975	29.9179	2.47055	-1.38613	-2.6325	-0.875
V93	V93	AS	-0.7935	-0.635417	2.45547	2.2225	0.1325	0.12725	-0.06375	24.5349	2.75615	-1.90769	6.5225	-0.375
V94	V94	AS	-1.2355	-0.5	3.20768	-2.7425	0.157	0.281	-0.13875	22.7123	0.0174625	-1.89615	-0.75	-0.125
V95	V95	AS	-1.0095	-0.441667	0.658919	3.87	0.07775	0.23825	-0.13875	24.5988	0.635976	-1.02491	14.665	0
V96	V96	AS	0.256	-0.2875	1.71588	-4.3775	0.26175	0.3335	-0.14025	0.874351	2.35138	-1.69642	-4.775	-0.25
V97	V97	AS	0.545	-0.425	2.10587	1.72	0.11075	0.1925	-0.1015	4.44767	1.5096	-1.01389	11.1725	0
V98	V98	AS	0.97725	-1.1	0.682821	0.7975	0.11275	0.174	-0.08625	16.6582	-0.329531	-2.169	6.945	0
V99	V99	AS	-1.701	0.441667	1.52081	1.88	0.129	0.23725	-0.12	4.73566	2.70168	-1.13835	14.14	0.875
V100	V100	AS	0.0335	-0.6125	0.987834	10.55	0.00175	0.2235	-0.151	16.3962	-0.162369	-1.92632	27.46	0.375
V101	V101	AS	-0.208	-0.3375	2.82155	7.8075	0.07275	0.25025	-0.146	23.3586	0.249118	-2.38591	17.7375	-0.375
V102	V102	AS	1.85725	0.670833	2.87851	-5.085	0.15425	0.25975	-0.128	25.2666	1.42045	-1.49226	-5.525	0
V103	V103	AS	-0.07475	0.05	0.557102	-7.455	0.24075	0.35425	-0.15825	19.2569	0.365447	-1.11298	-16.91	-0.5
V104	V104	AS	0.90975	-0.708333	1.51149	-3.77	0.08425	0.21825	-0.1205	37.4553	1.78215	-1.7677	1.6025	0.25
V105	V105	AS	-2.51677	-0.764198	0.357793	-15.4444	0.597044	0.411602	-0.0945093	22.0599	0.30758	-2.5729	-15.1341	0.509259
V106	V106	AS	6.35554	-1.2733	2.36537	11.2232	0.258342	0.327148	-0.139991	13.9726	0.223489	-1.38903	29.9116	-0.00925926
V107	V107	AS	8.771	-0.666667	1.98257	2.58	0.3925	0.421	-0.15475	15.4472	0.276468	-1.40374	18.7575	0.75
V108	V108	AS	7.846	-0.55	2.18123	3.0575	0.38575	0.3655	-0.1225	8.27565	1.08053	-1.64412	15.5125	0.5
V109	V109	AS	8.0185	-0.766667	-0.0383999	11.2525	0.1875	0.28825	-0.13725	12.4212	-1.68843	-1.90167	24.595	1.375
V110	V110	AS	0.43825	-1.08333	0.91627	6.755	0.13575	0.11725	-0.044	3.52705	-1.33229	-1.92571	18.865	0
V111	V111	AS	0.61975	0.025	0.959644	-5.3825	0.208	0.13325	-0.0355	19.8479	1.12988	-1.70999	-0.61	0.375
V112	V112	AS	-0.108	-0.308333	0.967088	-4.6775	0.21425	0.21025	-0.08075	19.1133	0.400529	-1.2354	-3.44	-0.25
V113	V113	AS	7.02	-0.895833	2.8567	-5.08	0.206	0.286	-0.1275	21.415	1.47461	-1.89494	4.615	0.25
V114	V114	AS	0.656234	-0.718578	2.86369	-9.05125	0.0304375	0.183042	-0.11875	33.3866	2.48495	-0.863583	-5.76651	0.669271
V115	V115	AS	0.891458	0.920231	1.83733	-0.404167	0.300833	0.204	-0.0475833	33.4425	1.93661	-2.05927	-0.984583	-0.145833
V116	V1	3A	1.46225	0.308333	0.829125	-0.805	-0.2955	-0.33275	0.0915	21.6083	2.62703	-1.46627	32.78	1.5
V119	V4	3A	2.22825	0.5375	0.419012	-18.8675	-0.0475	-0.21875	0.0955	24.6152	2.14537	-2.0806	18.025	0
V120	V5	3A	0.676	0.0208333	2.11662	-14.2125	-0.00825	-0.13	-0.00925	26.9979	2.65391	-2.26397	14.91	-1
V121	V6	3A	0.91675	0.379167	-0.266002	-17.46	-0.07725	-0.2235	0.065	29.0871	1.54645	-2.38811	4.72	-1.25
V122	V7	3A	3.67475	0.1875	2.91812	-12.04	-0.0025	0.0635	-0.03625	29.0437	2.79831	-0.902357	-20.98	-0.5
V123	V8	3A	-1.628	0.245833	1.0835	8.0675	-0.31675	-0.322	0.06475	45.6482	10.7232	-0.253971	35.595	1.5
V124	V9	3A	1.38425	0.554167	0.93134	-8.965	-0.2085	-0.28425	0.0795	21.3717	0.191618	-1.73845	26.87	0
V125	V10	3A	-0.92375	-0.295833	-0.151839	4.02	-0.20975	-0.222	0.033	32.1284	6.72383	-0.456192	11.54	-0.5
V126	V11	3A	0.67475	-0.0958333	1.34944	-23.1875	-0.019	-0.179	0.03125	29.5301	4.56323	-2.19448	5.6275	0.75
V127	V12	3A	0.300117	-0.0583333	0.345486	10.3815	-0.796426	-0.6925	0.20375	32.4392	2.23448	-1.67809	37.6391	1.18674
V128	V13	3A	-0.08375	0.0791667	1.44601	-15.45	-0.40025	-0.248	0.012	29.4103	2.34025	-1.33408	-4.1175	0.5
V129	V14	3A	-2.8445	0.0666667	3.09569	-2.5075	-0.191	-0.2515	0.07525	43.1817	9.95525	2.54536	-7.115	-0.625
V130	V15	3A	0.63725	1.1125	-0.536587	-3.2675	-0.421	-0.42075	0.13525	6.63555	-1.97426	-0.208552	31.6225	0.75
V131	V16	3A	-1.69725	-0.327083	-3.67928	19.0775	-0.742	-0.59075	0.16475	30.15	-3.74521	-0.177461	35.305	1.5
V132	V17	3A	0.66	0.2	3.01302	-10.09	-0.171	-0.213	0.05975	17.1593	1.79448	-1.27389	18.015	1
V133	V18	3A	-3.22975	0.0458333	-0.127187	-2.0125	-0.29275	-0.335	0.11825	14.4824	1.23999	-0.332083	1.165	-1
V134	V19	3A	-0.0778206	-0.333791	1.23648	9.2459	-0.517686	-0.710417	0.296684	16.9873	2.67574	-0.718506	28.0905	-0.240741
V135	V20	3A	1.00516	-0.0717486	1.37443	14.5641	0.391726	-0.126042	0.170495	28.2047	1.95503	0.1278	37.6	0.740741
V136	V21	3A	-1.267	-0.0958333	0.799602	9.32	-0.10525	-0.104	0.01775	11.6496	1.95214	-0.687938	21.75	0
V137	V22	3A	0.1205	1.1	2.86699	4.7025	-0.2445	-0.21425	0.0415	34.7069	2.85972	-1.40511	8.725	-1
V138	V23	3A	0.136	0.325	1.32266	1.0575	-0.442	-0.14175	-0.053	39.6032	3.29279	-0.95163	2.7675	-0.75
V139	V24	3A	-0.82025	0.2875	1.35665	14.08	0.251	-0.051	0.10275	13.618	2.47735	-0.96002	34.6025	-1
V140	V25	3A	-5.03225	0.170833	-2.2961	3.135	0.1995	0.283	-0.121	15.006	0.416823	-0.172799	8.71	-0.25
V141	V26	3A	-2.6545	0.545833	2.47274	9.61	0.01725	-0.24275	0.14625	28.1196	1.32713	-1.04032	24.1975	-0.75
V142	V27	3A	0.80675	0.0625	1.84344	5.83	0.17025	0.01525	0.037	27.1602	1.42014	-1.4707	10.97	-0.875
V143	V28	3A	0.6875	-0.375	0.133554	8.3475	-0.26	-0.2155	0.04925	23.9356	3.38	0.213887	16.8875	0
V144	V29	3A	-3.5105	0.320833	-0.886657	23.24	0.092	0.003	0.0055	11.6732	-0.170765	0.859301	41.6775	0
V145	V30	3A	-1.4925	0.45	-2.32262	-0.1825	0.08825	-0.00175	0.021	27.3194	-0.0605591	-1.07224	-5.4875	-1.25
V146	V31	3A	-3.9715	0.241667	0.0265156	-10.2225	-0.261	-0.2295	0.0155	12.1031	3.27089	-0.0331146	17.485	0.5
V147	V32	3A	-4.35475	0.566667	-2.94111	11.6775	-0.43225	-0.31775	0.0465	4.48259	0.479123	-0.800464	39.405	-0.25
V148	V33	3A	-2.792	-1.02917	0.273338	3.86	-0.211	-0.261	0.08775	25.6215	2.28728	-1.26439	11.74	0
V149	V34	3A	0.063	-0.0541667	-1.75157	-2.4875	0.074	-0.08175	0.064	8.67302	-0.00860995	0.364404	-11.1425	-0.5
V150	V35	3A	-0.352453	0.56713	-0.941222	-5.33153	-1.202	-1.18184	0.422205	5.20072	1.51955	1.72855	28.537	0.5
V151	V36	3A	0.071538	0.0578704	0.429787	-15.032	-0.149	-0.318657	0.0734498	24.6871	4.58955	-1.1046	18.0018	0.5
V152	V37	3A	-0.68375	-0.270833	-0.0341501	-18.5825	-0.076	-0.14725	-0.02125	24.1935	3.12864	-2.56496	10.305	0.5
V153	V38	3A	-14.8157	0.720833	-3.0691	1.725	-0.806	-0.664	0.199	12.4791	-0.191094	3.55393	21.105	0.75
V154	V39	3A	-10.421	1.5375	-3.72712	-25.27	-0.218	-0.0735	-0.0455	17.8501	-1.3896	1.05095	-36.2425	0
V155	V40	3A	-7.61136	1.15906	-2.03598	-13.3675	-0.200041	-0.166211	0.0299352	17.208	1.14828	-0.141193	-13.2575	0.5
V156	V41	3A	0.3055	0.483333	0.411167	9.71	-0.0965	-0.03825	-0.01575	24.1011	2.16808	0.0406498	7.625	0.5
V157	V42	3A	2.4645	-0.316667	0.322848	-23.4025	0.1845	0.259	-0.09475	27.3914	3.12687	-0.924625	-26.06	0
V158	V43	3A	4.27425	0.44375	0.922259	-6.85875	-0.672365	-0.769338	0.311169	27.7917	4.60095	-1.3398	14.9656	1.79327
V159	V44	3A	-0.039	0.429167	-0.129715	3.565	0.23375	0.18625	-0.0525	9.37436	0.845555	-1.56844	15.7925	0.75
V160	V45	3A	-0.6275	0.3125	2.26848	-15.2825	-0.2915	-0.23425	0	35.7013	5.85098	-0.343067	13.6275	1.25
V161	V46	3A	9.0825	0.4825	1.57184	-22.6275	0.02275	-0.1295	0.07875	7.28624	1.98002	-0.744609	-5.0825	0
V162	V47	3A	-0.66375	0.0916667	0.342896	-4.575	-0.29575	-0.18775	-0.02875	35.8316	2.76889	0.538291	24.54	1
V163	V48	3A	5.388	0.545833	1.86096	-13.275	-0.19475	-0.259	0.068	33.4587	4.04913	-0.205997	12.46	1.125
V164	V49	3A	-0.0775	-0.100833	0.165469	3.6375	-0.28025	-0.273	0.022	11.9132	1.55312	-1.10707	28.9925	0.5
V165	V50	3A	-1.9155	0.208333	2.70109	-2.7375	-0.32225	-0.2265	-0.01375	30.5869	3.42868	-0.296825	28.225	1.5
V166	V51	3A	0.1785	0.183333	1.46002	0.3875	-0.24075	-0.15	-0.03875	10.874	1.57459	-1.80604	20.1525	1.25
V167	V52	3A	-0.49625	-0.645833	1.24136	4.045	-0.155	-0.28125	0.123	33.4074	2.17715	-0.571631	10.4025	0.375
V168	V53	3A	6.0585	0.0208333	2.99699	6.2075	-0.128	-0.298	0.11275	17.8493	2.92506	-0.420938	13.84	-0.5
V169	V54	3A	-0.622	-0.0375	1.86264	-12.2025	0.09275	-0.0285	0.026	26.3445	4.85138	-0.147997	8.3325	0.875
V170	V55	3A	-10.7235	-0.2125	0.00492723	-16.0275	0.23	-0.03975	0.088	26.2134	3.67667	-0.0478721	-19.655	-0.5
V171	V56	3A	-6.40175	-1.1375	1.71257	-15.9	-0.469459	-0.343939	0.0698348	19.1144	4.93907	-0.436137	-2.235	1
V172	V57	3A	-2.43425	-0.1375	-0.553258	13.4675	-0.79225	-0.7195	0.21825	18.578	2.57633	-0.682555	31.445	1.5
V173	V58	3A	-0.75125	-0.195833	0.29563	-12.2775	-0.2545	-0.2585	0.052	26.9665	-0.0478898	-2.30236	14.51	0.5
V174	V59	3A	-1.85025	0.154167	1.41496	-9.7975	-0.2095	-0.4965	0.276	21.9644	2.07952	1.00642	-25.395	-1
V175	V60	3A	0.3125	-0.2375	-1.22533	-3.8975	0.11675	-0.03825	0.04675	27.1478	0.968013	-1.55714	-16.3175	-0.75
V176	V61	3A	6.707	0.0604167	2.98548	9.8875	-1.05825	-0.8975	0.2455	22.2469	2.92598	-1.17451	21.8075	0.5
V177	V62	3A	3.96655	0.00840164	3.48426	6.00127	-0.737052	-0.637199	0.182125	33.4487	5.55015	-0.455994	27.7668	1.25
V178	V63	3A	-0.95375	-0.1625	2.14343	-1.6975	-0.37	-0.2295	-0.01225	27.1999	5.85569	-1.45499	19.14	1
V179	V64	3A	-1.6115	0.779167	-1.94397	-12.2325	-0.1095	-0.2795	0.13425	13.0324	1.98167	0.713334	4.17	-0.25
V180	V65	3A	1.5285	0.00416667	0.522657	-12.5375	-0.223	-0.30475	0.1185	31.8931	2.72918	-2.28758	-3.75	0.5
V181	V66	3A	1.71	-0.0458333	2.88113	-9.7075	-0.4735	-0.429	0.11925	34.4917	2.57423	-3.12432	3.9775	2
V182	V67	3A	2.922	0.129167	3.22231	-17.1225	0.03125	-0.0835	0.056	39.1412	5.15478	-2.1523	-17.0025	0
V183	V68	3A	-6.3165	0.254167	1.56689	-18.565	-0.29625	-0.43975	0.20125	-4.32266	2.85787	1.15275	-10.61	-0.125
V184	V69	3A	0.56425	-0.2125	3.1978	-19.7	0.2675	0.101	-0.02375	34.8406	2.9967	-1.90683	-10.895	-0.25
V185	V70	3A	0.64425	-0.445833	-0.605035	10.1075	0.23625	0.0415	0.04525	7.35033	-0.668993	-0.583	22.8075	-0.5
V186	V71	3A	-0.815	-0.0520833	0.889861	-11.0225	0.03275	-0.09625	0.034	27.0805	3.57026	-1.14012	19.715	-0.25
V187	V72	3A	-0.4565	0.4375	0.776174	-6.015	-0.33275	-0.24575	-0.0165	27.0017	3.41755	-0.356071	1.295	-0.75
V188	V73	3A	0.36875	-0.608333	-0.104126	-11.9675	0.18475	0.32275	-0.171	32.6877	3.1188	-0.491316	-16.2025	-0.5
V189	V74	3A	0.92475	0.325	1.12832	-1.6675	-0.18675	-0.28575	0.0915	15.1333	3.41792	1.42156	30.03	1.5
V190	V75	3A	2.37225	0.320833	0.945119	-13.6125	-0.216	-0.189	0.02	34.0981	3.09509	-0.88907	11.125	1.25
V191	V76	3A	3.5705	0.25	1.53748	3.225	-0.32825	-0.245	0.041	29.9685	2.08324	-1.34727	24.51	0.5
V192	V77	3A	3.43411	0.755836	1.67688	5.27319	-0.520576	-0.633289	0.270125	16.7988	3.3437	-0.784995	38.995	1.5
V193	V78	3A	-1.58275	0.470833	2.20878	-5.2125	0.38875	0.1345	0.02025	15.9412	1.83934	-0.643205	8.555	0.5
V194	V79	3A	0.4835	0.779167	1.2229	2.0225	0.06775	0.02425	-0.00125	30.5971	2.24316	-1.68985	3.26	-1
V195	V80	3A	1.2495	-1.35583	2.47572	21.855	-0.35925	-0.2215	0.00775	18.3403	2.18075	-1.13151	36.425	1.25
V196	V81	3A	-1.54125	1.00417	0.77666	-12.0725	-0.45175	0.193	-0.379	23.9484	0.787924	-0.157229	-0.2725	-1.125
V197	V82	3A	-5.04475	-0.604167	0.593896	0.650462	-0.247262	-0.24475	0.08775	25.1769	0.0302479	-0.407375	4.26133	-0.97125
V198	V83	3A	-0.2765	0.075	0.709841	-7.1375	-0.23225	-0.2305	0.054	28.9034	2.01326	-0.308379	-9.63	-0.75
V199	V84	3A	-1.38525	0.259743	0.585096	-10.84	0.499898	0.174375	0.029875	32.9514	3.94263	-0.399602	-21.9817	-0.75
V200	V85	3A	0.2315	0.420833	1.29793	-4.1575	0.126	-0.09525	0.09225	27.3146	2.98716	-1.34167	1.86	-0.75
V201	V86	3A	0.41575	0.2375	-0.245011	-4.385	-0.17325	-0.248	0.05625	34.1116	3.30163	-0.986004	12.63	-0.5
V202	V87	3A	-0.10375	0.425	0.342744	-6.96	0.20075	-0.223	0.16825	10.0349	0.979464	-1.28515	-1.7375	0.125
V203	V88	3A	-1.26775	0.1375	1.88304	-4.265	0.13175	-0.024	0.0515	19.1602	3.22513	-1.39286	-1.96	-0.5
V204	V89	3A	0.21625	0.429167	1.04773	0.3475	0.1525	0.026	0.0235	28.0862	3.78797	-0.102957	0.0525	0.25
V205	V90	3A	-1.99	-0.25	2.32971	-12.3525	-0.22	-0.24825	0.04975	30.1108	5.60409	1.14107	-32.315	-1.5
V206	V91	3A	2.97175	0.866667	1.85333	-4.685	0.13425	0.026	0.0225	31.9587	3.39258	-1.26241	-9.13	-1
V207	V92	3A	1.566	0.727083	0.660093	0.6075	0.11725	-0.00775	0.0325	24.6925	0.595472	-1.03956	-1.7625	-1
V208	V93	3A	0.43125	0.333333	2.02029	4.4625	-0.122	-0.067	-0.001	26.4899	2.34059	-1.25213	8.5325	-0.5
V209	V94	3A	0.75975	0.270833	1.05061	-7.6275	0.25	0.09425	0.0115	33.6135	3.48918	-0.62348	-12.44	-1
V210	V95	3A	1.50325	0.0875	0.113395	-0.145	-0.00275	0.02	-0.024	27.0381	1.25394	-0.718995	10.625	0.25
V211	V96	3A	1.18925	0.275	2.40737	-5.4225	0.02225	-0.04775	0.027	14.2898	3.11593	-0.572321	-1.225	0
V212	V97	3A	2.93725	0.595833	1.40589	3.34	0.02175	-0.03475	0.02175	24.8284	1.02258	-0.602324	17.4925	-0.25
V213	V98	3A	-4.41	-0.3375	1.14291	20.7775	-0.14025	-0.07625	-0.0035	4.09182	1.09742	-1.51703	43.9	0.75
V214	V99	3A	1.75175	-0.333333	0.676406	2.505	8.88e-16	0.0225	-0.01325	4.66496	0.929232	-0.363027	14.575	0.5
V215	V100	3A	2.41575	0.15	2.13366	12.735	0.02125	-0.02525	0.01525	26.6071	1.61984	-0.517207	31.05	0.875
V216	V101	3A	-0.56925	-0.233333	2.1703	10.0725	-0.03425	0.0435	-0.03925	18.8447	1.52337	-1.00519	25.5875	0.375
V217	V102	3A	3.9195	-0.2	3.61152	1.285	0.04875	0.0105	0.00225	20.8167	3.81956	-0.831799	12.155	-0.25
V218	V103	3A	5.5175	-0.129167	1.71744	-7.23	-0.27675	0.08	-0.1305	40.3165	2.34465	-0.481968	-20.7	-0.75
V219	V104	3A	2.865	-0.0125	1.82326	4.445	-0.17075	-0.07	-0.01325	32.4656	1.53204	-1.04523	21.0575	0.875
V220	V105	3A	-0.761	-0.395833	0.897619	-8.9375	0.24075	0.1035	0.004	27.1611	2.20841	-1.25102	-4.01	0
V221	V106	3A	3.3775	-0.865476	1.54666	6.0325	0.10125	0.03175	0.0085	17.5487	1.07703	-0.584905	17.5575	-1
V222	V107	3A	-7.39925	-0.3125	-1.73827	-6.18	-0.14	-0.18675	0.0675	17.3101	-0.468651	-0.43877	-4.7575	0.5
V223	V108	3A	-3.70875	-0.229167	2.79524	-4.3375	0.41325	0.27925	-0.03525	15.1653	0.736291	-0.199966	-6.3225	-0.75
V224	V109	3A	1.90275	-0.0708333	-1.14851	6.2475	-0.1645	-0.158	0.037	21.0771	-0.460875	-0.866266	14.215	1
V225	V110	3A	2.029	0.295833	0.594109	10.355	0.01425	-0.0815	0.04725	5.34602	-0.237427	-0.631376	25.34	-0.25
V226	V111	3A	1.7245	0.545833	0.214882	-0.2075	0.1255	-0.124	0.10475	24.6379	-0.457418	-0.909761	8.645	0
V227	V112	3A	2.52225	-0.153241	1.9638	5.0925	0.02175	-0.1015	0.062	7.04432	0.204279	-0.713901	17.335	0.5
V228	V113	3A	-4.47075	0.981667	-0.516098	-10.21	0.3505	0.10825	0.04575	-2.46671	-1.59503	-0.881846	-7.28	-0.5
V229	V114	3A	-1.3655	0.752083	1.81174	-10.9875	-0.01375	0.09925	-0.029	9.72873	1.91292	-0.436357	-3.73	0.5
V230	V115	3A	2.23371	0.81	-0.121558	-1.81167	0.104583	-0.003875	0.0252917	29.3748	0.455613	-1.02131	-9.21833	-0.552083
V231	V1	Y58S	1.31075	-0.8	-2.98555	-3.8575	-0.0235	-0.05625	-0.00175	21.6259	-4.18208	-1.1614	13.0375	0.25
V234	V4	Y58S	0.89125	-1.06898	-0.868769	-23.915	0.2445	0.05725	0.01175	24.6352	0.0799284	-2.30629	-3.8525	-0.25
V235	V5	Y58S	0.759441	-1.12544	1.37226	-12.02	0.20825	0.133	-0.10675	23.9263	-0.152795	-1.82533	1.66	-0.75
V236	V6	Y58S	-0.57875	-1.37917	0.139167	-8.6325	0.12875	0.023	-0.02275	22.5451	-1.47835	-2.84184	6.5575	-0.25
V237	V7	Y58S	1.02475	-1.2375	3.18433	-16.8275	0.036	0.0395	-0.0115	34.5277	1.54663	-2.44689	-40.3325	-0.5
V238	V8	Y58S	0.1215	-1.39583	-0.350203	4.88	0.01825	-0.041	-0.009	19.6236	-2.70951	-0.919312	24.6575	0.5
V239	V9	Y58S	1.20175	-1.4875	0.559089	-10.1825	0.126	0.00075	0.00225	28.1519	0.153807	-2.43436	10.4725	-0.5
V240	V10	Y58S	-1.54125	-1.1375	0.82921	0.6675	-0.05525	-0.036	-0.03175	26.586	-1.74147	-1.46141	-1.6125	0.375
V241	V11	Y58S	2.87175	-2.04583	2.68765	-33.69	0.324	-0.0025	0.056	16.4657	2.71438	-2.44157	-30.205	-0.25
V242	V12	Y58S	0.8	-1.62098	1.1666	7.31041	-0.466659	-0.494	0.19375	20.6338	0.558741	-1.46133	16.7479	0.6875
V243	V13	Y58S	-0.93875	-0.9375	1.67506	-11.0575	-0.12275	-0.0275	-0.03275	19.0655	0.284502	-0.673493	-8.39	0.625
V244	V14	Y58S	3.0115	-1.81667	3.63005	-1.24	-0.001	-0.071	0.0315	33.1844	0.337557	-1.59462	0.3075	-1
V245	V15	Y58S	1.86525	-1.62083	0.884887	-17.86	-0.086	-0.18325	0.0995	28.4573	-0.596812	-2.07302	-5.5	-0.25
V246	V16	Y58S	0.59625	-0.0225	1.31126	-14.64	-0.1565	-0.20475	0.0885	29.774	-0.61508	-1.58686	-2.3075	-0.625
V247	V17	Y58S	-1.0605	-1.55	2.97448	-17.9525	0.1175	0.145	-0.076	31.8219	-0.193411	-0.201484	-9.8875	0.5
V248	V18	Y58S	2.55475	-1.39583	1.48048	-9.045	-0.03325	-0.0665	0.031	24.8579	1.24586	-1.6848	-15.0975	-1
V249	V19	Y58S	5.45818	-2.28379	1.66651	-4.9716	-0.277186	-0.411917	0.174934	11.0361	0.171007	-0.0557088	-10.527	0.384259
V250	V20	Y58S	5.49616	-0.996749	1.77448	0.381562	0.0517265	-0.0290416	0.0167446	27.7933	-0.299416	-0.524339	-1.76751	-0.259259
V251	V21	Y58S	-2.1935	-1.54583	0.724873	0.1875	0.06275	0.0385	-0.0185	28.7337	-2.04879	-2.03747	-1.1875	0
V252	V22	Y58S	-0.871902	-1.3375	2.27752	-4.075	0.412269	0.152255	0.0345	37.5334	-0.748746	-3.56077	-12.19	-1
V253	V23	Y58S	-1.671	-1.19167	1.19584	-5.73	0.1355	0.07875	-0.00725	37.2597	0.195357	-2.74451	-16.225	-0.75
V254	V24	Y58S	-3.82775	-1.87083	-1.79259	0.0225	-0.043	0.027	-0.032	29.2355	-1.46283	0.0198922	-4.445	-1
V255	V25	Y58S	1.28225	0.445833	-0.354163	5.1575	-0.193	-0.0195	-0.05825	18.5343	-0.611623	-1.51157	9.3725	-0.25
V256	V26	Y58S	1.8285	0.129167	1.47822	1.4125	-0.13425	-0.11075	0.024	40.5237	-1.8305	-1.89309	-0.125	-1
V257	V27	Y58S	-0.02775	-0.520833	3.56882	-2.6575	0.37375	0.12175	0.04075	36.6452	-0.116435	-1.18385	-10.1075	-1
V258	V28	Y58S	-3.4495	-1.075	-0.0468324	3.275	-0.1165	-0.089	0.0195	29.6505	-0.231403	-1.38726	3.995	1
V259	V29	Y58S	2.6055	-1.4875	0.960161	13.8175	0.0985	0.243	-0.13675	28.1769	-1.05465	-0.786176	17.62	0
V260	V30	Y58S	2.82975	-1.05417	0.117952	19.5375	-0.4385	-0.21725	0.0293707	27.3024	-0.175081	-1.92134	41.5367	0
V261	V31	Y58S	-2.3625	-0.858333	-1.01871	-8.255	0.095	0.078	-0.06025	26.6229	0.415034	-1.88547	10.0825	-0.5
V262	V32	Y58S	-0.04525	-1.08333	-0.618255	-0.8	0.05775	-0.03775	0.03675	5.56302	-1.13395	0.213971	15.4225	1.75
V263	V33	Y58S	-1.878	0.229167	0.930469	3.5275	0.1145	0.0305	0.018	22.4066	-0.0866221	-1.07941	7.3675	0
V264	V34	Y58S	0.4985	-0.545833	-0.298616	-1.965	0.156	0.02975	0.02625	21.3031	-1.67777	-1.4364	-6.935	-0.5
V265	V35	Y58S	-0.464453	-0.966204	-3.3074	4.60097	-0.235	-0.268843	0.0264551	17.7377	-3.14516	-0.555473	18.4195	0.5
V266	V36	Y58S	3.00654	-2.07546	0.380414	-25.1895	0.1255	0.0753426	-0.1083	2.76649	0.722298	-3.64881	-30.3857	0.25
V267	V37	Y58S	0.65475	-0.779167	1.76361	-19.175	0.241	0.10825	-0.0795	20.4432	2.3229	-1.50538	3.5875	0.5
V268	V38	Y58S	3.04725	-0.904167	-0.0195074	-23.4075	0.033	-0.18	0.14525	23.4782	-0.432227	-0.611981	-26.9775	-0.75
V269	V39	Y58S	-4.5185	-1.37917	1.324	-11.2725	-0.25	-0.2095	0.06375	19.5158	-0.36311	0.368947	-10.88	1.5
V270	V40	Y58S	-3.9675	-0.1125	-0.560125	-33.59	0.1605	-0.08	0.10775	35.2434	-1.09833	-2.05628	-55.7725	-0.875
V271	V41	Y58S	0.205	-1	0.136654	-17.3525	0.2215	0.07775	0.0205	24.3093	-1.29955	0.222712	-42.3575	-0.75
V272	V42	Y58S	8.0195	-1.65833	1.6404	-24.68	0.304	0.407	-0.147	32.9045	3.88192	-1.99278	-30.1475	0
V273	V43	Y58S	4.32075	-1.23125	0.32006	2.51875	-0.360865	-0.519838	0.257419	18.5467	1.62774	-1.70106	16.6531	0.918269
V274	V44	Y58S	1.6875	-1.42917	2.35666	11.2175	0.11575	-0.03725	0.05625	26.2474	1.56215	-1.35037	28.58	0.75
V275	V45	Y58S	0.5565	-1.19583	2.13944	-21.38	0.0615	0.00225	-0.02825	40.3575	4.14622	-1.53557	1.39	0.5
V276	V46	Y58S	10.644	-1.32917	3.41821	-21.66	-0.50475	-0.4815	0.1695	26.6787	1.91412	-1.72343	-1.425	1
V277	V47	Y58S	0.26575	-0.916667	-0.363553	-13.1625	0.09175	0.00125	-0.005	34.6286	0.874857	-0.995285	9.9725	0
V278	V48	Y58S	0.138	-0.9625	2.25378	-0.9375	-0.01425	-0.012	-0.03525	44.6858	1.04665	-0.522387	10.0225	2
V279	V49	Y58S	6.064	1.14792	-0.0762846	8.705	-0.47325	-0.5445	0.30175	20.1409	-2.80951	-1.96104	28.36	0.5
V280	V50	Y58S	1.332	-1.48333	1.88224	-12.795	0.04025	0.05	-0.072	40.4875	1.17255	-1.35578	7.4175	1
V281	V51	Y58S	1.949	-1.06333	2.32986	3.525	0.27775	0.166	-0.0565	8.43089	0.00267427	-1.61503	7.36	0.75
V282	V52	Y58S	1.37275	0.6625	1.69519	-5.5525	-0.008	-0.05125	0.02925	35.3143	-0.464624	-1.27074	-11.635	-0.5
V283	V53	Y58S	-1.0925	-1.82917	3.44442	-1.1	0.2685	0.0745	0.02	24.4027	-0.873174	-0.629778	-8.1025	-0.625
V284	V54	Y58S	0.372	-1.04583	1.40257	-10.8	0.18675	0.075	0.00175	39.1097	1.58566	-1.54332	5.97	1
V285	V55	Y58S	3.86795	-0.321414	2.39968	-14.3575	0.42725	-0.0420534	0.173575	34.6614	2.64422	-1.48584	-14.815	-0.5
V286	V56	Y58S	3.933	-1.00417	3.32612	-30.755	0.313	-0.014	0.10975	32.4019	4.04713	-1.23728	-38.4175	-1
V287	V57	Y58S	-8.28275	-1.7125	0.259607	4.455	0.07375	-0.037	0.0455	28.9693	-1.11901	-0.00490248	3.2025	0.5
V288	V58	Y58S	1.53575	-1.97917	1.24698	-16.03	0.08	0.0155	-0.01275	29.4885	-1.58405	-2.4818	-6.9775	-0.25
V289	V59	Y58S	0.25975	-1.74167	1.26763	-4.265	0.018	-0.018	0.01675	35.9815	0.161238	-0.0680758	-11.8075	-1
V290	V60	Y58S	2.3515	-1.31667	2.46136	0.485	0.14425	0.11575	-0.032	33.1174	2.81148	-1.26124	-4.325	-0.25
V291	V61	Y58S	0.7285	-1.58839	2.66847	-11.145	0.11275	0.0155	0.02425	29.6417	0.486573	-0.861106	-30.115	-1
V292	V62	Y58S	4.83255	-1.65827	1.12763	22.2788	-0.383052	-0.421199	0.173375	29.4332	-1.99544	-1.38078	29.6493	1.25
V293	V63	Y58S	1.99625	-0.871759	2.73931	-1.335	0.1155	-0.0935	0.09	24.8475	4.43037	-0.988852	21.1925	1.5
V294	V64	Y58S	1.3708	-0.98047	1.53256	-0.925028	0.192833	-0.0454362	0.0932144	15.5696	1.63831	-0.291972	18.5309	0.490741
V295	V65	Y58S	1.53299	-1.50379	2.01674	0.202902	-0.0738333	-0.242056	0.132845	19.9158	0.780825	-1.91635	11.6589	0.759259
V296	V66	Y58S	1.4705	-1.7625	2.4918	-4.2	-0.143	-0.161	0.0625	26.772	-0.854896	-2.42345	3.875	1
V297	V67	Y58S	6.4015	-1.7375	2.25206	-13.17	0.28075	0.085	0.03525	37.3893	1.12918	-2.08041	-15.22	1
V298	V68	Y58S	-2.898	-1.85417	2.84161	-12.3675	0.17025	0.14575	-0.0525	29.9963	0.389254	-2.12271	-5.2625	1
V299	V69	Y58S	1.67975	-1.4375	3.08352	-12.3725	0.486	0.3225	-0.086	29.7896	0.677346	-0.63826	-6.8125	0.5
V300	V70	Y58S	-1.81675	-1.64375	-1.83364	9.495	-0.02625	0.1525	-0.095	24.8105	-4.48283	1.57425	12.195	-0.5
V301	V71	Y58S	1.29	-1.07292	1.19217	-13.67	0.14975	0.14575	-0.07825	28.4449	0.214677	-1.91968	5.7925	-0.375
V302	V72	Y58S	0.7395	-0.379167	2.23357	-6.3525	0.00725	-0.04475	-0.01775	35.3319	2.68731	-1.8225	-0.2975	0.25
V303	V73	Y58S	1.12275	1.025	1.13954	-1.21	0.32975	0.20225	-0.04625	28.6902	-2.47306	1.75965	20.925	-0.5
V304	V74	Y58S	-0.91025	-1.51667	2.52629	-15.71	0.06675	-0.00475	-0.01075	10.6894	1.22963	-0.436083	8.6075	0.5
V305	V75	Y58S	1.83125	-1.97083	3.67158	-16.33	0.057	0.0865	-0.06375	29.3137	3.20408	-0.917316	-9.1425	0.25
V306	V76	Y58S	4.749	-1.89583	1.53828	-4.8025	-0.07175	-0.015	-0.01625	28.6465	1.13963	-1.82352	0.8575	0.5
V307	V77	Y58S	3.79061	-1.08583	2.58686	0.355688	-0.305076	-0.351289	0.153375	25.6116	0.263278	-0.0498597	12.9225	1.5
V308	V78	Y58S	-5.89675	-1.5	2.53178	-9.935	0.37325	0.322	-0.0905	25.7597	-0.834055	-1.32665	-12.1425	0
V309	V79	Y58S	-0.813	-0.445833	2.17359	0.055	0.13575	0.17875	-0.067	33.855	1.11178	-1.56677	-4.2425	-1.875
V310	V80	Y58S	1.361	-2.1125	1.17169	2.0125	0.04175	-0.006	0.0055	38.3985	-0.391931	-2.7222	0.7325	-0.25
V311	V81	Y58S	-1.12525	-1.62917	0.46082	-4.595	0.14825	0.024	-0.02675	24.9492	-1.2278	-0.695868	-1.705	0.25
V312	V82	Y58S	-0.106	-2.24583	2.01425	-5.18	0.03875	-0.11675	0.0915	26.009	-0.51447	-2.53193	-14.0325	-0.875
V313	V83	Y58S	1.63365	-0.984416	1.87622	-6.13222	-0.0236759	0.130165	-0.103884	26.1268	-0.516637	-1.79799	-13.6238	-0.527778
V314	V84	Y58S	1.26613	-0.948206	1.16661	-2.59533	0.137324	0.121288	-0.050371	23.3259	-1.39651	-1.48673	-6.19287	-0.347222
V315	V85	Y58S	0.7615	-0.9375	0.544668	-1.385	0.228	0.13375	-0.0105	21.3519	-1.88986	-1.50262	-2.6375	-0.25
V316	V86	Y58S	-2.7235	-1.24167	0.541013	-9.26978	0.507015	0.839585	-0.423824	23.5987	-2.11807	-1.79818	-7.39242	-1
V317	V87	Y58S	-1.58375	-1.28333	0.297042	-6.0425	0.19875	0.1715	-0.0475	25.4379	-1.52664	-1.96046	-7.57	0.5
V318	V88	Y58S	1.50525	-0.7875	1.69462	-7.1125	0.07525	0.0075	0.01325	24.2023	-1.41053	-0.848248	-14.4525	-0.5
V319	V89	Y58S	-1.65675	-0.345833	0.501083	-0.94	0.2275	0.184	-0.04275	34.8285	1.66731	-1.42866	-6.015	0.25
V320	V90	Y58S	1.324	-2.10833	2.14446	-10.835	-0.047	-0.10975	0.038	29.5334	0.775801	-1.33667	-31.8525	-1
V321	V91	Y58S	-1.32025	-0.316667	3.29543	-6.7425	0.00175	0.0035	-0.00275	33.3574	1.05082	-1.68018	-15.0125	-0.5
V322	V92	Y58S	-1.28975	-0.36484	1.33645	-0.991227	-0.0205	0.252386	-0.165786	28.1732	-0.147045	-1.6135	-4.67897	-1
V323	V93	Y58S	-0.68725	-0.6	1.34824	2.765	0.056	0.101	-0.04625	34.5446	-1.64692	-1.365	4.235	-0.5
V324	V94	Y58S	-0.83725	-1.55417	1.92655	-7.305	-0.0045	0.12575	-0.07625	30.7297	-3.59243	-2.18499	-18.7025	-0.5
V325	V95	Y58S	-4.57925	-1.2875	-3.97446	15.9525	-0.65675	0.1855	-0.30875	33.4083	-3.67834	3.10601	24.2175	0.75
V326	V96	Y58S	-1.70475	-1.31667	1.53537	-6.525	0.09475	0.14825	-0.06275	19.8704	-2.16032	-1.49322	-13.9675	-0.25
V327	V97	Y58S	-1.31975	-1.75833	2.7807	-2.3175	0.06325	0.12425	-0.054	25.5115	-0.462392	-1.74661	-7.06	0.75
V328	V98	Y58S	1.339	-0.3125	1.58472	-2.095	0.11025	0.09525	-0.02525	28.4325	-0.248296	-2.67451	-2.2325	0.625
V329	V99	Y58S	-0.95075	-1.22917	0.638302	-11.1025	-0.067	0.101	-0.0805	35.2712	-0.382019	-1.12546	-17.9775	0.375
V330	V100	Y58S	-0.92375	-1.27917	1.64688	6.8025	0.12075	0.11525	-0.033	28.3463	-1.51638	-1.94733	10.9875	0.875
V331	V101	Y58S	-0.39275	-1.08333	1.98224	6.215	0.05525	0.194	-0.0975	30.6686	-1.8449	-1.66027	10.57	0.25
V332	V102	Y58S	-0.351	-1.93333	3.12636	-8.5325	0.13275	0.1915	-0.073	21.9	0.916399	-1.16278	-20.7875	-0.25
V333	V103	Y58S	-1.0585	-1.69583	1.88045	-0.4025	0.23775	0.269	-0.08825	27.5303	-1.17851	-2.03156	-5.9825	0.25
V334	V104	Y58S	0.099	-1.19583	2.02157	-4.7925	0.10975	0.149	-0.0545	40.9173	1.09763	-2.09325	-6.45	0
V335	V105	Y58S	-1.797	-1.82917	0.988978	-11.755	0.28625	0.2	-0.03375	20.1977	-0.0401526	-2.18463	-13.6525	1
V336	V106	Y58S	-0.4435	-1.72083	2.53016	-0.185	0.09425	0.07425	-0.01425	19.68	-1.21959	-0.937431	-7.23	-1
V337	V107	Y58S	-1.13975	-2.0875	1.15295	-7.5075	0.1085	0.13575	-0.04875	29.9354	-1.35818	-1.2386	-14.25	0.5
V338	V108	Y59S	-1.42475	-1.82917	2.94853	-7.565	0.17775	0.17625	-0.0505	36.9416	-0.934686	-0.634796	-16.695	-0.625
V339	V109	Y60S	-0.50125	-1.70417	0.275967	-4.575	0.0265	0.0905	-0.04625	19.3902	-1.69679	-1.58832	-13.4125	0
V340	V110	Y61S	-0.546	-0.742262	2.14323	-0.8775	0.04875	0.113	-0.0515	27.8035	-2.77573	-1.25919	-5.4075	-0.25
V341	V111	Y62S	-0.362	-0.7125	0.996784	-10.62	0.124	0.092	-0.018	32.4259	0.0332339	-1.7128	-19.0275	0
V342	V112	Y63S	-1.16825	-1.54583	1.77351	0.79	0.18675	0.1745	-0.04525	21.9334	-0.571356	-1.43016	-1.5725	-0.375
V343	V113	Y64S	-1.63825	-1.73333	0.890788	-1.9025	0.0805	0.08775	-0.029	25.8204	-0.0705485	-0.967244	1.0625	0.5
V344	V114	Y65S	-6.1375	-1.30167	0.948853	-21.74	0.30975	0.12075	0.02075	16.821	-3.54505	-1.07612	-36.0975	0
V345	V115	Y66S	-0.897917	-0.719583	0.882522	-2.32792	0.153958	0.10175	-0.0169583	35.4442	0.734478	-1.74866	-10.3108	-0.552083
V346	V1	GZ63	-0.214	-0.108333	-1.24187	-7.11e-15	0.0445	0.12	-0.10075	2.9586	-3.96493	-0.358617	19.1375	0
V349	V4	GZ63	1.2695	1.00417	0.0842265	-26.0075	0.279	0.123	-0.01075	22.5832	-3.22761	-1.65296	1.8975	-0.75
V350	V5	GZ63	3.57975	0.979167	1.18359	-21.4125	0.42225	0.21425	-0.073	17.9288	-1.54024	-1.43332	-18.1375	-1.5
V351	V6	GZ63	1.547	1.05417	-0.051017	-26.265	0.22575	0.09975	-0.02825	15.8579	-1.15422	-1.76634	-35.0225	-1.75
V352	V7	GZ63	9.12314	0.821142	3.46248	-14.8087	-0.373954	-0.53362	0.262297	20.1517	0.230307	-2.3288	-23.8712	-0.927842
V353	V8	GZ63	2.7428	-0.204475	2.47636	-32.9194	0.146563	0.12462	-0.0778742	34.8585	1.51352	-1.90098	-19.5137	-0.744572
V354	V9	GZ63	1.9165	-0.5375	1.01971	-23.175	0.207	0.1455	-0.06625	27.06	0.0263302	-1.80352	-9.9275	-1.5
V355	V10	GZ63	10.4059	-0.54216	0.403833	12.6452	0.135762	0.08775	-0.0332754	21.9615	-2.04579	-1.86976	35.7125	0.0646552
V356	V11	GZ63	6.426	-0.4375	1.06181	-19.0075	-0.0055	0.11425	-0.1495	24.6556	-0.162939	-1.8702	2.63	0.5
V357	V12	GZ63	3.92925	0.145833	1.9074	3.0475	-0.3035	-0.00125	-0.109	29.8535	-0.740183	-0.868627	6.4825	0
V358	V13	GZ63	1.396	0.0958333	0.561942	-19.235	-0.01725	0.09725	-0.08025	22.8497	-2.12255	-1.05431	-16.155	-0.5
V359	V14	GZ63	-0.07225	-1.24167	33.9834	40.4175	-0.39	0.21875	-0.323	11.2541	-25.2016	5.03562	72.3825	1.375
V360	V15	GZ63	0.738	0.345833	-0.784874	-9.1475	-0.125	-0.03	-0.021	27.4609	-2.17958	-0.39684	20.345	-0.25
V361	V16	GZ63	3.3945	-0.8875	1.01751	-7.4025	-0.001	-0.0595	0.0505	19.6239	-1.42948	-0.642892	18.2475	-0.5
V362	V17	GZ63	-0.23525	-0.408333	1.2791	-19.805	0.078	0.17975	-0.118	37.0235	0.268733	0.804405	-5.4275	0.5
V363	V18	GZ63	3.0405	1.65417	1.22065	-8.3475	0.13125	0.09825	-0.0275	26.244	-0.666279	0.0685395	-10.9275	-1
V364	V19	GZ63	0.308429	-0.633791	0.0448511	7.8909	-0.225686	-0.293167	0.114434	-5.18355	-1.69568	-0.772833	25.643	0.759259
V365	V20	GZ63	6.07691	0.244918	1.74767	2.20406	0.0602265	0.0472084	-0.0492554	15.1343	-2.17613	-0.454223	5.50749	-0.259259
V366	V21	GZ63	-3.41075	0.279167	-4.49445	7.81	0.13425	0.05025	-0.0305	26.7606	-5.89109	-0.319425	14.2075	0
V367	V22	GZ63	-1.63275	0.883333	1.13306	-2.3375	0.1805	0.0915	-0.02975	29.3153	-2.95946	-2.16026	-4.2625	-1
V368	V23	GZ63	-2.84925	-0.358333	0.938798	-3.4525	0.242	0.18	-0.05575	28.5153	-2.2804	-0.0837198	-5.785	-0.75
V369	V24	GZ63	-1.382	-0.654167	-2.48965	1.285	0.04	0.11725	-0.0805	16.4013	-3.35479	-0.0821544	0.38	-1.75
V370	V25	GZ63	0.1425	-0.2875	-0.386541	0.785	0.063	0.10925	-0.06025	28.6937	-1.49638	0.700997	3.9625	-0.25
V371	V26	GZ63	0.33075	-0.271	0.884392	1.265	0.10575	0.1165	-0.0605	18.8217	-3.31202	-1.64585	3.875	-1.875
V372	V27	GZ63	6.0875	-0.195833	1.43066	-0.885	0.01275	0.373	-0.23875	43.0593	-3.55947	-0.59502	-6.1925	-1
V373	V28	GZ63	-1.80975	0.291667	-1.16898	1.9075	0.026	0.10675	-0.0705	26.1497	-3.49105	-0.809045	3.62	0
V374	V29	GZ63	2.02425	-0.518452	0.66172	24.04	0.0855	0.28875	-0.17975	23.0773	-3.57555	0.254593	39.1	0
V375	V30	GZ63	-0.52775	1.98333	-1.95137	-2.1925	0.48475	0.2085	0.00725	28.5266	-5.25357	-1.3591	-9.14	-2
V376	V31	GZ63	3.43275	-0.325	-2.40825	-15.1415	0.744	0.79975	-0.34825	32.34	-2.32469	0.968635	-11.0765	-0.9745
V377	V32	GZ63	1.41792	1.22083	-0.0350968	-28.917	0.268856	0.49225	-0.236153	43.9991	0.660241	-0.041678	-24.9095	-0.23725
V378	V33	GZ63	-1.14525	1.60417	-0.0028735	1.155	0.1115	0.04825	-0.0095	27.7088	-1.24049	-0.730796	2.9625	-0.5
V379	V34	GZ63	0.78975	0.3625	0.24424	-2.4125	0.213	0.0625	0.00575	28.2209	-0.711806	-1.28427	-8.67	-0.5
V380	V35	GZ63	2.1478	-0.641204	-0.313451	-14.9665	-0.2295	-0.187093	-0.0275449	11.3585	-0.0879869	-1.57312	-20.7455	-0.5
V381	V36	GZ63	0.247788	-0.558796	0.195214	-15.552	0.105	0.122593	-0.1428	22.4192	-0.456336	-0.545334	9.54432	0.375
V382	V37	GZ63	1.5965	-0.379167	0.0617199	-24.8275	0.3865	0.232	-0.103	22.7042	-0.875657	-2.35736	-1.5175	-0.5
V383	V38	GZ63	-2.078	1.1375	-2.60124	6.06	-0.153	-0.05525	-0.01125	22.4359	-3.2076	0.174153	29.7525	0.75
V384	V39	GZ63	-6.07375	0.0825	-0.366112	-12.485	-0.3165	0.02325	-0.13575	20.9299	-3.66827	-0.109894	-7.62	1.125
V385	V40	GZ63	-7.12459	-0.0958416	-1.87826	-19.8102	-0.15525	0.126894	-0.135036	19.0618	-3.45449	-0.235529	-20.1705	0.387067
V386	V41	GZ63	-2.71725	-0.175	-2.79133	-11.915	0.158	0.394	-0.2125	26.2902	-4.25675	0.409097	-26.3725	-0.5
V387	V42	GZ63	0.979054	-0.109829	-2.51644	-15.135	-0.14075	-0.023	-0.01875	22.5865	-1.90959	-2.11987	-5.2575	0.4375
V388	V43	GZ63	2.584	0.01875	-1.05015	-4.60375	-0.415865	-0.368588	0.130419	26.376	-0.585583	-1.44578	10.7781	0.793269
V389	V44	GZ63	3.22225	0.854167	3.10303	-4.955	0.01075	0.057	-0.04675	31.9884	1.31182	-1.11595	-3.66	-0.5
V390	V45	GZ63	3.03975	-0.470833	2.52177	-26.4225	0.05	0.1455	-0.12925	29.3125	1.10487	-1.92453	-6.67	0.5
V391	V46	GZ63	13.0747	0.720833	2.36717	-21.5975	-0.43925	-0.34575	0.101	25.2967	-1.27025	-1.72254	10.845	1
V392	V47	GZ63	1.8245	-0.658333	-0.382552	-15.15	0.08925	0.1305	-0.093	20.4862	-1.49426	-1.3706	15.0625	0.5
V393	V48	GZ63	0.49725	-0.3625	1.60242	-9.595	0.00625	0.10775	-0.10625	27.0622	0.416138	-0.764788	2.2325	0.75
V394	V49	GZ63	1.05975	1.1675	-0.135726	-5.4925	-0.07575	0.15025	-0.19925	24.4114	-4.20369	-0.946075	11.78	-0.25
V395	V50	GZ63	-0.07575	-0.265	2.16238	-8.1875	0.00575	0.18125	-0.1745	38.954	-0.389144	-0.507558	22.8225	1.25
V396	V51	GZ63	-2.12875	-0.110417	0.272341	21.9075	-0.03025	0.15275	-0.1585	36.9198	1.45618	-0.644272	35.06	1.25
V397	V52	GZ63	-1.73541	-0.310292	0.402667	28.4326	0.248855	-0.187107	0.208149	31.3934	0.516993	-0.935594	42.0415	0.981481
V398	V53	GZ63	6.35766	0.390803	3.74378	14.3349	-0.213508	-0.51653	0.224409	25.6772	0.641437	-0.410899	30.6933	0.0185185
V399	V54	GZ63	1.72475	0.46875	1.84229	-20.0925	0.14325	0.13125	-0.05175	35.5864	0.221055	-0.624039	-14.22	0
V400	V55	GZ63	-4.02625	-0.654167	1.9175	-14.9875	0.399	0.2735	-0.06325	26.0805	0.273302	-0.63798	-18.8825	-0.5
V401	V56	GZ63	3.40175	-1.22917	2.55152	-24.1225	-0.133	0.02775	-0.07025	32.4463	-0.175251	-0.599373	-10.3825	0
V402	V57	GZ63	-0.9555	-0.339167	-0.802436	5.4475	-0.17225	-0.06775	-0.022	23.2046	-3.32951	0.247127	23.7875	0.5
V403	V58	GZ63	3.07	-0.4375	0.658197	-17.4025	0.192	0.16275	-0.07175	24.3655	-3.51859	-2.56708	-0.6925	-1.25
V404	V59	GZ63	1.9992	-0.555332	1.23393	-2.40318	0.28975	-0.0115289	0.0764488	27.6963	-0.876454	-1.44155	-3.80489	-1.09511
V405	V60	GZ63	1.70175	-0.7375	1.88782	-1.9925	0.26075	0.1295	-0.0085	32.7929	1.08221	-1.92007	-11.64	-0.375
V406	V61	GZ63	-1.63625	-0.729167	2.18566	-5.0825	-0.06225	0.25075	-0.18875	28.9331	-1.45921	-0.470897	-8.265	-1
V407	V62	GZ63	6.8913	-0.391598	1.62806	-7.13873	-0.646052	-0.182449	-0.106625	30.9828	-1.18135	-1.11248	3.0243	0.25
V408	V63	GZ63	2.651	-0.5875	-0.256461	7.1175	-0.1555	-0.09975	0.032	22.4592	-3.46182	-0.62663	30.7425	1
V409	V64	GZ63	-6.55725	-0.129167	-11.1672	-5.4275	0.7105	0.68075	-0.2515	13.5517	-20.1453	4.71888	4.8575	-0.25
V410	V65	GZ63	3.48375	1.32917	2.10852	-19.3975	0.2385	0.0385	0.05325	39.571	1.0374	-1.25507	-24.9725	-0.5
V411	V66	GZ63	1.69551	0.974882	2.29829	-20.1759	0.282111	0.0633981	0.0494074	37.3194	-0.747125	-2.29042	-22.7343	0
V412	V67	GZ63	2.54699	0.193745	2.2542	-16.0726	0.193139	0.0401019	0.0308426	28.7439	-0.635859	-1.75272	-16.5715	0
V413	V68	GZ63	-0.56975	-0.354167	1.00682	-20.455	0.30875	0.2625	-0.09	20.6728	-1.03884	-1.67442	-12.4525	0
V414	V69	GZ63	3.2055	-0.645833	2.00391	-15.24	0.257	0.21825	-0.0885	23.6198	-1.72228	-1.59558	5.5125	0.5
V415	V70	GZ63	7.75525	-0.485632	0.198104	9.6696	0.09975	-0.139358	0.126962	16.402	-3.73078	-0.619818	35.4805	0.336538
V416	V71	GZ63	3.55575	-0.825	1.63131	-22.4025	0.25875	0.213	-0.08375	22.8027	-0.957117	-1.66383	-2.8775	-0.75
V417	V72	GZ63	2.01525	1.2625	1.18468	-12.02	0.22625	0.0975	-0.01925	27.296	4.11318	-0.932654	-13.8375	-0.75
V418	V73	GZ63	-5.8355	-0.375	-0.395538	-6.9775	0.53825	0.737	-0.32725	24.8039	-3.38197	0.424222	-7.87	-0.625
V419	V74	GZ63	-2.6685	0.075	1.04416	-26.9791	0.3215	0.54425	-0.30975	24.8142	0.221222	-0.225221	-18.115	-0.0625
V420	V75	GZ63	3.8245	0.2375	3.06317	-20.2125	0.03	0.12225	-0.09425	25.4868	0.473171	-1.20788	-5.6575	0.25
V421	V76	GZ63	7.22725	-0.5625	0.930618	-10.165	-0.05675	0.03775	-0.04925	24.9545	-0.882415	-1.82412	0.7575	0.5
V422	V77	GZ63	6.07036	-0.0295806	1.73072	-8.60181	-0.233076	-0.241539	0.110375	18.8913	-0.86264	-0.173761	2.6625	0.5
V423	V78	GZ63	-4.0335	0.0833333	1.63708	-10.7575	0.55825	0.41475	-0.11	13.1491	-2.08611	-1.22224	-9.6325	-0.5
V424	V79	GZ63	1.34325	1.87083	1.10432	1.1175	0.29575	0.125	0.0035	29.4447	-3.01734	-1.62713	2.0075	-2
V425	V80	GZ63	2.43425	-0.0708333	1.00058	7.92	0.08425	0.14275	-0.083	37.1521	-2.73755	-1.43544	21.1625	-0.75
V426	V81	GZ63	5.97675	0.558404	-4.24736	2.7393	-0.635525	0.223609	-0.435742	18.7876	-10.3814	1.98544	21.507	0
V427	V82	GZ63	-3.51075	-1.42083	-9.83593	32.3175	-0.81825	-0.1375	-0.1975	15.465	-20.0379	4.30489	43.9825	1
V428	V83	GZ63	1.48975	-0.316667	0.905696	-11.1525	0.09025	0.03225	0.00525	20.4423	-1.47143	-0.227918	-23.9825	-0.75
V429	V84	GZ63	1.81351	0.54516	2.12766	-7.37755	0.158472	0.129938	-0.030875	24.5941	-0.223102	-1.19839	-9.72667	-0.6875
V430	V85	GZ63	1.57625	1.4	2.24431	-3.7925	0.206	0.1905	-0.067	27.2854	0.272292	-1.74493	4.5225	-0.625
V431	V86	GZ63	1.60223	1.22213	1.85439	-13.6083	0.601215	0.660986	-0.346532	30.5639	-0.40127	-1.75654	-6.25906	-1.47266
V432	V87	GZ63	5.39825	1.29963	0.978358	-14.5875	0.448886	-0.166859	0.150289	32.8454	-0.626179	-1.43662	-19.27	-0.1875
V433	V88	GZ63	-2.44023	1.36795	1.87227	-13.4267	0.512738	0.0427246	0.077841	28.393	-1.16863	-1.20802	-29.1209	-0.902344
V434	V89	GZ63	-0.032	1.2625	0.553741	-0.7575	0.307	0.15625	-0.01275	27.2983	-2.14025	-0.140147	-5.625	-0.25
V435	V90	GZ63	-1.89625	0.575	1.24867	-8.0025	0.207	0.0775	0.001	29.5129	-0.912308	-0.420749	-12.3225	-1
V436	V91	GZ63	1.8185	0.133333	1.98864	-6.46	0.04275	0.09075	-0.06125	32.0094	-2.44264	-1.23485	-16.5875	-1.5
V437	V92	GZ63	1.62975	-0.00833332	0.168466	-2.0775	0.49225	0.209	0.00675	28.1626	-2.8993	-2.09966	-8.97	-2
V438	V93	GZ63	-0.799	0.283333	0.902924	0.1775	0.2145	0.13975	-0.04525	29.9226	-1.08453	-0.218904	-0.145	-0.5
V439	V94	GZ63	-0.4035	-0.0166667	1.63634	-7.42295	0.012622	0.19275	-0.1175	33.4845	-0.899465	-0.0770502	-14.6721	-0.5
V440	V95	GZ63	-0.3155	-0.254167	1.9422	1.17	0.08525	0.15875	-0.08475	34.0472	-1.23745	-0.473137	6.4475	-0.25
V441	V96	GZ63	-0.214	0.116667	1.48538	-7.9425	0.26075	0.253	-0.09325	18.9918	-2.84736	-0.388964	-11.2175	-0.5
V442	V97	GZ63	2.08525	0.0459763	-1.13731	15.5975	-0.5345	-0.17025	-0.0968889	26.8088	-6.23204	1.65905	28.3575	0.75
V443	V98	GZ63	3.33075	-0.504167	-3.50251	36.3425	-1.32175	-0.2965	-0.24725	30.3333	-8.44153	4.541	59.2075	1.75
V444	V99	GZ63	3.75945	-0.38069	-0.882955	17.0649	-0.420958	-0.150458	-0.05125	11.7536	-4.34776	2.97764	29.1	1.11293
V445	V100	GZ63	1.604	-0.500833	1.37283	33.045	-0.03025	0.105	-0.0875	10.6946	-2.88884	-0.512225	43.3425	0.875
V446	V101	GZ63	-0.9485	-0.741667	-1.36397	0.5725	0.22375	0.27925	-0.1205	28.5643	-5.15715	-0.879832	3.365	-0.625
V447	V102	GZ63	5.99325	-0.0833333	4.49505	7.385	0.02325	0.29275	-0.1855	27.4805	-13.8177	0.73206	18.0225	-0.125
V448	V103	GZ63	-1.41675	-0.570833	-0.299052	-10.095	0.24975	0.26175	-0.10225	29.1077	-4.11536	-0.302864	-26.1875	-0.75
V449	V104	GZ63	1.40925	-0.410417	2.62344	-3.86	0.15025	0.17575	-0.0775	39.4167	-1.2366	-1.28283	-0.095	0
V450	V105	GZ63	0.55525	-0.270833	0.604614	-7.5925	0.16125	0.32725	-0.16975	26.7153	-3.14078	-1.10089	-0.5275	1
V451	V106	GZ63	0.85725	0.875	-0.0918334	1.7025	0.18375	0.263	-0.11925	27.0258	-2.64287	0.352045	1.76	-1
V452	V107	GZ63	-2.5185	-0.970833	0.432026	-2.745	0.1525	0.328	-0.17225	22.822	-4.5366	-0.818275	-0.565	0.5
V453	V108	GZ63	-1.5225	-0.504167	1.21168	0.7875	0.16775	0.3395	-0.172	32.1842	-4.62419	-0.368214	4.26	0
V454	V109	GZ63	-2.7925	-0.4625	-1.11795	-3.0375	-0.084	0.16425	-0.14675	31.6575	-4.80737	-0.95238	-5.6425	0.5
V455	V110	GZ63	0.34475	-0.545833	0.620688	2.985	0.15125	0.12075	-0.0405	16.9274	-3.77675	-1.01595	8.5975	-0.25
V456	V111	GZ63	0.27725	-0.120833	-0.510084	-7.5325	0.195	0.09075	-0.016	20.2928	-3.94784	-1.68511	-1.7475	0
V457	V112	GZ63	-1.313	0.245833	0.692573	13.0675	0.09275	0.18525	-0.10175	18.9002	-3.68445	-0.337429	14.6875	-0.375
V458	V113	GZ63	-2.019	-0.485417	-0.302824	3.61	0.1885	0.1185	-0.027	27.1113	-9.57297	2.24807	23.5975	0.5
V459	V114	GZ63	-5.74325	0.266667	0.367643	-19.7325	0.11025	0.3565	-0.19325	18.5705	-2.4888	-0.734414	-27.8825	0
V460	V115	GZ63	1.01796	0.171726	0.965285	-0.730417	0.408083	0.18625	-0.000958333	28.3389	-1.72502	-1.53545	-5.59333	-0.583333
V461	V1	PA64	1.62975	-0.0421296	-1.10443	10.055	-0.2265	-0.12075	-0.0125	24.0338	-4.50823	-2.27148	30.355	1
V464	V4	PA64	1.84475	0.141667	0.475721	-23.0575	-0.0055	-0.06225	0.0255	29.8486	-0.435217	-3.18147	-7.355	0.125
V465	V5	PA64	1.51532	-0.0541667	2.17079	-17.8919	-0.05775	-0.00375	-0.082	31.6774	0.306096	-3.01298	-11.825	-0.932247
V466	V6	PA64	-0.04825	-0.45	0.448721	-19.905	-0.15325	-0.131	0.013	30.846	-0.284644	-4.30741	-16.075	-1
V467	V7	PA64	5.03275	-0.0666667	1.97691	-8.32	0.161	0.127	-0.03075	30.0573	-1.33175	-3.21962	-15.18	-0.5
V468	V8	PA64	1.4065	-0.0166667	1.6215	8.3125	-0.14625	-0.0915	-0.01675	21.431	-1.972	-2.16759	28.8	1.5
V469	V9	PA64	0.58025	-0.258333	-0.30224	-9.845	-0.1105	-0.04025	-0.043	25.7407	-0.900403	-2.92753	10.845	-0.5
V470	V10	PA64	2.99425	0.358333	0.179747	17.035	-0.13625	-0.0625	-0.0295	15.7241	-2.42394	-2.47318	38.95	0.5
V471	V11	PA64	0.71625	0.00833333	-0.789255	13.8275	-0.64	-0.523	0.22775	11.7357	-4.02055	-1.81431	33.2225	2.5
V472	V12	PA64	0.2425	3.625	-0.90526	5.8425	-0.1235	-0.0115	-0.03525	33.0548	-1.58431	-2.25693	4.885	0
V473	V13	PA64	-0.00725	-0.0916667	0.754831	-13.925	-0.25875	-0.085	-0.0335	31.2503	-1.71393	-2.4869	-10.5675	1
V474	V14	PA64	1.025	-0.854167	2.60647	0.2125	-0.2405	-0.102	-0.02575	25.5872	-0.646348	-1.65929	0.325	-0.625
V475	V15	PA64	-2.02075	1.35	-1.30383	-11.2175	0.11	-0.11975	0.13225	25.7304	-2.88659	-2.09906	2.6225	-0.375
V476	V16	PA64	-2.91825	-0.35	-0.293697	-11.8125	0.125	-0.14525	0.16125	11.2798	-2.07264	-1.66481	9.755	-1.5
V477	V17	PA64	1.382	-0.370833	0.432122	-10.21	-0.114	-0.0325	-0.02875	30.8579	-2.26339	-1.9266	9.84	1.5
V478	V18	PA64	-0.00425	-0.236667	0.73875	1.3725	-0.16125	-0.076	-0.00225	29.4194	-0.472443	-1.36918	7.36	0
V479	V19	PA64	1.94968	-0.546291	0.344561	12.6109	-0.426186	-0.497917	0.194684	19.7978	0.783565	-2.50151	30.4455	1.25926
V480	V20	PA64	2.27416	1.09075	0.953276	13.3491	-0.0837735	-0.0850416	-0.000505386	25.7735	0.609371	-1.3547	31.69	0.740741
V481	V21	PA64	3.14	-0.258333	0.847276	10.395	0.10725	-0.006	0.01175	19.8567	-1.84038	-1.76551	25.57	0
V482	V22	PA64	0.496	-0.254167	1.16725	1.9725	0.01	0.00825	-0.016	40.7718	-2.1022	-2.43176	1.005	-1
V483	V23	PA64	0.2275	0.0208333	0.0456106	3.9525	0.105	0.00225	0.0245	24.4924	-3.17264	-2.1637	12.7075	0
V484	V24	PA64	0.99025	0.116667	-3.3694	7.63	0.066	0.0555	-0.01925	22.6514	-4.96573	-1.34628	15.8275	-1
V485	V25	PA64	-7.78225	-0.458333	-4.77004	26.175	-0.607	-0.1695	-0.097	2.02965	-10.2159	3.81628	44.625	1.625
V486	V26	PA64	0.746	0.896667	-1.22999	12.825	0.03825	0.03075	-0.01425	18.3674	-5.12895	-1.7415	23.4575	-0.5
V487	V27	PA64	-2.38925	0.491667	0.682158	2.765	0.10775	0.10125	-0.031	33.8516	-3.80286	-1.00502	-0.865	-0.75
V488	V28	PA64	-9.648	-0.0125	-1.57892	7.2225	-0.231	-0.1015	-0.01275	25.7351	-2.95734	0.242871	11.3275	1
V489	V29	PA64	-2.741	-0.0666666	-0.179562	-0.135	0.114	0.136	-0.0625	30.2933	-0.834425	-1.18705	-5.8575	-1
V490	V30	PA64	-0.486	0.679167	-0.341217	0.4325	0.18625	0.06825	0.018	29.1946	-2.23276	-1.50305	-4.0825	-1.125
V491	V31	PA64	-3.291	0.145833	-0.861406	-4.2325	-0.1605	-0.114	0.006	30.5724	-1.90994	-0.819416	21.565	-0.5
V492	V32	PA64	-5.05375	-0.0525	-0.224192	-21.0575	0.35475	0.56425	-0.2595	34.7161	0.102191	-1.78567	-10.99	-0.25
V493	V33	PA64	-6.5015	-0.125	-1.28849	15.34	-0.073	-0.1265	0.05125	13.0025	-2.8015	-0.944351	30.91	0.125
V494	V34	PA64	0.456	0.433333	-0.433917	1.8825	0.018	-0.01675	0.0105	26.0257	-1.64556	-1.51793	5.0025	-0.5
V495	V35	PA64	-1.95395	-0.303704	-1.37866	-5.58153	-0.4985	-0.325343	-0.0212949	17.6799	-2.15055	-1.13498	-0.258023	0.5
V496	V36	PA64	0.00703795	0.112037	0.0849935	-25.532	0.024	-0.134157	0.0369498	20.7994	-0.0433924	-1.86164	-17.8832	-0.5
V497	V37	PA64	-0.87025	0.0916666	0.0888833	-19.7725	0.1215	0.03625	-0.04975	24.3962	0.310524	-1.77067	3.395	0.5
V498	V38	PA64	-2.95275	0.766667	-0.819297	-21.36	0.074	-0.1075	0.108	17.5735	-2.27754	-1.33974	-19.54	-1.25
V499	V39	PA64	-9.1185	0.458333	-0.286708	-11.97	0.0115	-0.095	0.075	15.8024	0.897929	-0.948331	-9.6625	1
V500	V40	PA64	-10.115	0.691667	-3.78254	-26.2425	0.109	0.0055	0.0345	2.06958	-2.82428	-1.15955	-39.53	0.125
V501	V41	PA64	-3.3635	0.645833	0.181044	-9.645	0.3725	0.14375	0.02575	23.9375	-2.23434	-0.755558	-16.185	-0.5
V502	V42	PA64	3.543	-0.270833	0.157758	-23.5375	0.198	0.1725	-0.04925	30.4348	1.03567	-3.6368	-31.12	-0.125
V503	V43	PA64	3.57625	0.20625	-0.746058	-8.99875	-0.495865	-0.590838	0.282669	20.604	1.04248	-3.59242	-0.254361	0.918269
V504	V44	PA64	0.556	0.508333	1.34416	0.92	0.34575	0.18775	-0.043	24.777	2.17568	-0.648733	13.8075	0.75
V505	V45	PA64	-0.5295	-0.0583333	-0.237747	-21.5075	-0.028	-0.06475	0.0095	29.2799	0.457244	-2.42177	-1.2125	0.5
V506	V46	PA64	11.9277	0.0653654	1.18528	-21.1232	-0.706098	-0.571393	0.19	19.1438	-1.86129	-2.77951	-0.0218913	0.75
V507	V47	PA64	2.37625	-0.0225	-0.00798543	-16.01	-0.20675	-0.04325	-0.07325	30.9113	-1.54185	-2.6759	0.295	-0.5
V508	V48	PA64	4.481	0.666667	2.47088	-9.045	0.07925	-0.0255	0.023	41.5217	-0.245655	-1.43026	12.18	1.875
V509	V49	PA64	0.8005	0.09	0.247136	6.1825	-0.13225	-0.0745	-0.0375	25.5188	-1.78239	-2.42272	27.1525	0.75
V510	V50	PA64	-0.1995	0.288167	2.46345	1.4275	-0.17175	-0.0495	-0.05925	33.4472	-0.89252	-2.35039	29.325	1.5
V511	V51	PA64	-2.874	0.895833	0.493626	-14.3825	0.28625	0.0685	0.01925	26.8293	0.116571	-2.26795	-6.7125	0.75
V512	V52	PA64	-0.14275	0.964583	1.60887	-0.425	-0.1465	-0.05975	-0.013	31.8437	-0.24938	-1.15872	2.5675	0.5
V513	V53	PA64	2.4145	-0.141667	3.04953	6.2475	0.088	-0.002	0.00325	25.0641	-0.660541	-1.57653	9.505	-0.5
V514	V54	PA64	1.5805	-0.0166667	1.47936	-9.4925	-0.01325	0.035	-0.0325	31.6546	1.36852	-1.5394	2.5525	1
V515	V55	PA64	-8.2105	-0.233333	1.95266	-10.7825	0.4775	0.19175	0.027	29.6602	0.744628	-1.19536	-10.96	-0.5
V516	V56	PA64	-0.9015	-0.433333	-1.83917	3.8425	0.3045	0.0575	0.0595	14.4711	-4.87775	-1.66295	31.77	0
V517	V57	PA64	-12.5407	0.225	-0.718966	-0.4125	0.27025	-0.237	0.25325	20.3901	-1.73321	-0.427588	13.365	0.5
V518	V58	PA64	1.28675	-0.325	0.611225	-10.4625	-0.072	-0.064	0.0045	27.2885	-2.15221	-3.23065	8.185	-0.25
V519	V59	PA64	0.333647	-0.129167	-0.0182462	8.57114	-0.0155266	-0.211883	0.118508	24.9974	-1.19313	-2.21546	23.0172	-0.5
V520	V60	PA64	0.441	-0.0833333	-0.314224	8.8475	-0.05025	-0.03175	0.00525	26.6551	-0.418525	-2.75616	21.7675	-0.25
V521	V61	PA64	2.518	-0.191667	2.49007	-0.5775	0.00275	0.0915	-0.059	34.9683	-0.75777	-1.70117	-3.5675	-1
V522	V62	PA64	3.55155	-0.254098	1.65051	9.56127	-0.684052	-0.492199	0.127125	31.3217	0.809508	-1.85181	28.0818	1
V523	V63	PA64	-0.17575	-0.341667	0.82716	1.8825	-0.2295	-0.1615	0.02625	28.0316	-1.78247	-2.0354	20.7	1.5
V524	V64	PA64	-6.6615	0.236111	-0.658097	-17.0375	0.1735	0.065	0.00025	29.3296	1.75233	-0.0699475	-17.75	-0.75
V525	V65	PA64	-10.699	1.01667	0.0165751	-23.6075	0.602	0.32325	-0.014	39.4167	-2.26961	-2.80602	-39.285	-0.5
V526	V66	PA64	1.6635	-0.108333	2.22189	-14.2125	-0.0235	-0.139	0.09075	44.8843	-0.503719	-3.84227	-7.5775	0
V527	V67	PA64	4.675	-0.0916667	2.9622	-18.9025	0.21225	0.019	0.0555	40.2829	0.511263	-3.10115	-20.9275	0
V528	V68	PA64	1.948	0	1.75344	-7.6	-0.15325	0.00075	-0.05875	23.0827	-1.75933	-1.90358	4.05	2
V529	V69	PA64	0.84875	-0.325	1.9557	-18.975	0.3305	0.2695	-0.10025	28.2177	-0.404221	-2.70211	-16.165	-0.375
V530	V70	PA64	0.00925	-0.141667	-0.323224	14.0825	0.26875	0.11	0.01425	15.8918	-0.788733	-1.90638	29.7425	0.5
V531	V71	PA64	-2.754	-0.2125	-0.29011	-5.9475	0.10425	0.07825	-0.04	16.8637	-1.57515	-2.63341	22.82	0.75
V532	V72	PA64	0.0855	-0.266667	0.198472	-6.27	-0.00575	-0.11475	0.0575	27.79	0.289957	-2.34709	-5.29	-0.25
V533	V73	PA64	-1.06875	0.0520833	0.148295	-13.7025	0.14525	0.10675	-0.0365	24.1629	-0.854138	0.568714	-23.0225	-0.5
V534	V74	PA64	-0.89125	-0.0875	-1.07156	7.9825	-0.01975	-0.08775	0.04	20.412	-3.30293	-1.14607	34.565	1.5
V535	V75	PA64	2.98725	0.475	1.89104	-7.8375	-0.167	-0.0465	-0.0395	24.4607	-0.552095	-2.82669	10.66	1.25
V536	V76	PA64	1.7625	-0.075	1.58099	-10.57	0.23275	0.491	-0.2335	29.6954	0.704788	-1.48008	-8.88	-0.5
V537	V77	PA64	4.37111	0.543336	1.60649	-10.3618	-0.457076	-0.484289	0.222625	35.9082	1.17669	-1.04097	0.135	0.375
V538	V78	PA64	-1.30525	0.111833	2.73258	-2.7075	0.31875	0.2465	-0.06375	23.6771	0.634156	-1.67926	8.405	0.5
V539	V79	PA64	5.739	-0.383333	1.2384	27.9925	-0.70875	-0.35225	0.00875	10.2811	-4.36784	-3.96305	54.425	0.75
V540	V80	PA64	-1.393	-1.51167	0.205211	17.095	-0.09425	-0.079	0.01925	40.6182	-2.07556	-2.9113	30.23	1.125
V541	V81	PA64	3.25375	0.0535714	1.21306	0.5175	-0.11175	-0.1515	0.0475	28.29	-1.57505	-2.11397	14.4975	0
V542	V82	PA64	-2.3335	-0.466667	0.454366	6.0875	-0.11675	0.03475	-0.06275	25.0389	-2.32409	-1.86122	17.205	-0.125
V543	V83	PA64	-0.282	0.295833	0.422934	-4.3375	-0.19175	-0.0635	-0.026	29.5878	-2.75714	-1.35737	-2.05	-0.75
V544	V84	PA64	-1.32375	0.406767	0.481549	-5.97005	0.508898	0.370375	-0.081625	22.8316	-0.465916	-1.03681	-9.75167	-0.75
V545	V85	PA64	-0.1305	0.284333	0.797716	-3.8275	0.0825	0.07675	-0.02375	32.7332	0.246673	-2.66564	-6.275	-0.625
V546	V86	PA64	0.56975	-0.0916667	1.18508	-14.745	-0.14525	-0.1085	0.00075	30.3664	-0.358239	-2.89772	-11.555	-1
V547	V87	PA64	3.24175	0.245833	0.193975	-6.42	0.31425	0.1445	-0.01075	24.2699	-1.48673	-2.40255	-4.4125	1
V548	V88	PA64	-3.72846	0.931105	0.83624	-7.7325	0.428092	0.224386	-0.000995116	21.3481	-1.39774	-2.71226	-16.1225	0.125
V549	V89	PA64	-0.86625	1.29167	-0.431838	0.1075	0.233	0.036	0.0505	23.5789	-1.88154	-1.98442	-2.3175	0.25
V550	V90	PA64	-1.8365	-0.0791667	1.55344	-9.5875	-0.0915	-0.13325	0.05375	29.4069	-0.158717	-1.67955	-30.085	-1
V551	V91	PA64	0.51025	0.270833	0.206948	-0.38	0.01575	0.0325	-0.0185	33.5932	-0.581799	-0.713631	-1.435	-0.5
V552	V92	PA64	0.8205	0.429167	0.90503	-0.9875	0.21175	0.08725	0.01	32.9502	-0.0185653	-2.00244	-5.3925	-2
V553	V93	PA64	-1.28375	-0.0625	1.17131	7.4975	0.0005	0.0805	-0.0575	32.3174	-0.844769	-1.71748	14.6875	-0.5
V554	V94	PA64	2.85675	0.375	0.238637	6.1925	0.1625	0.17125	-0.056	24.7333	-0.651085	-1.50061	8.445	0.5
V555	V95	PA64	2.61775	0.275	1.67598	10.625	-0.02475	0.105	-0.075	34.34	-3.26316	-1.17536	21.24	0.75
V556	V96	PA64	2.31775	-0.275167	1.21381	-4.9475	0.13875	0.16975	-0.065	20.7343	-2.02824	-1.7722	-7.7	0.5
V557	V97	PA64	3.49825	0.408333	0.531821	15.3	0.05375	0.02675	-0.00425	15.7366	-2.46648	-1.89179	32.1175	0.75
V558	V98	PA64	3.074	-0.283333	0.208551	20.3775	-0.07725	0.00925	-0.028	26.7548	-3.41771	-1.99819	38.11	0.75
V559	V99	PA64	3.45925	-0.225	0.587631	-11.945	0.0065	0.1035	-0.06325	32.1204	1.20662	-1.38006	-16.405	0.375
V560	V100	PA64	4.58725	0.141667	1.63546	11.68	0.05625	0.01325	0.00925	26.0319	-0.985547	-1.82127	27.325	1
V561	V101	PA64	2.93325	0.2625	0.34307	6.6975	0.09525	0.146	-0.06075	40.8675	-1.57077	-1.56452	17.7125	-0.625
V562	V102	PA64	2.6335	-0.2375	2.32224	-0.485	0.10775	0.157	-0.06625	20.8988	-1.212	-1.12944	0.13	-0.25
V563	V103	PA64	3.423	-0.225	0.244169	-5.29	0.20825	0.1945	-0.057	40.1463	-1.59905	-1.18892	-13.96	-0.75
V564	V104	PA64	3.2835	-0.15	1.51686	-0.735	-0.07825	0.089	-0.07775	38.2958	-0.77036	-4.19847	7.8025	0.125
V565	V105	PA64	-1.8545	0.491667	-0.569039	-4.1275	0.07275	0.0445	-0.006	20.0104	-0.944113	0.0243224	-1.635	1
V566	V106	PA64	3.077	-0.945833	0.939299	12.9725	0.26825	0.20975	-0.047	17.1023	-3.01019	-2.01123	25.2625	-0.125
V567	V107	PA64	2.20075	-0.383333	1.36373	1.645	-0.04	0.10875	-0.08	26.0808	-2.4279	-1.24202	7.9325	0.5
V568	V108	PA64	4.02475	-0.0583333	1.04025	2.0575	0.20775	0.15025	-0.02925	33.3537	-3.1134	-0.481487	7.9375	0.25
V569	V109	PA64	0.00375	-0.0916667	0.708429	2.3775	0.0205	0.0555	-0.034	25.8256	-2.48987	-0.797272	6.515	0.25
V570	V110	PA64	2.3895	0.0666667	-0.0638492	12.095	0.00725	0.0025	-0.00075	18.1207	-3.24758	-1.81469	26.415	0.75
V571	V111	PA64	3.371	0.425	1.4581	1.3425	0.0255	-0.0115	0.00925	22.9206	-1.56452	-2.53605	8.535	0
V572	V112	PA64	3.81275	-0.0277778	1.89762	11.9325	0.18225	0.0835	0.0015	20.0445	-2.56463	-1.92163	24.75	0.5
V573	V113	PA64	3.93975	0.0541667	1.21038	-9.455	-0.005	-0.00375	-0.00625	27.6451	-1.80708	-0.497107	-6.55	0.5
V574	V114	PA64	-9.949	-0.245833	0.0133943	-14.6325	0.37575	0.23225	-0.025	20.0779	-4.96026	-1.46969	-17.275	0
V575	V115	PA64	1.06246	0.255833	-0.126757	5.63958	0.109583	0.079625	-0.0167083	32.9434	-2.02416	-2.34173	9.59292	-0.0833333

## Sheet: Table S6
N	SNP	Chr	bp	P.value	Traits	Effect	Source	Association	Loci	RAPdb	Distance(Kb)	Known gene	Type	Reference	Annotation	Function
1	chr01_5672712	1	5672712	3.91e-09	MRR	Additive	Hybrid	1	1	Os01g0205700	102.895
2	chr01_5711993_2	1	5711993	2.12e-12	MRR	Dominant	Hybrid	2	1	Os01g0205700	63.6145
3	chr01_5711993_2	1	5711993	1.28e-09	MRR	Dominant	Combine	2	1	Os01g0205700	63.6145
4	chr01_5712944	1	5712944	3.24e-14	MRR	Additive	Inbred	3	1	Os01g0205700	62.6635
5	chr01_5712944	1	5712944	5e-09	MRR	Additive	Hybrid	3	1	Os01g0205700	62.6635
6	chr01_5746884_2	1	5746884	2.96e-10	GW	Dominant	Combine	4	1	Os01g0205700	28.7235
7	chr01_6941508	1	6941508	4e-15	GL	Additive	Combine	5	2	Os01g0226700	68.2315
8	chr01_22364071_2	1	22364071	8.38e-10	PC	Dominant	Combine	6	3	Os01g0578000	8.155
9	chr01_23541376_2	1	23541376	1.62e-10	CD	Dominant	Combine	7	4	Os01g0600900	66.576
10	chr01_23662453_2	1	23662453	3.48e-09	AC	Dominant	Hybrid	8	4	Os01g0602200	1.2835
11	chr01_24031856	1	24031856	3.16e-12	GW	Additive	Inbred	9	5	Os01g0609300	46.3735
12	chr01_24077848_2	1	24077848	5.84e-10	CD	Dominant	Hybrid	10	5	Os01g0609300	3.1595
13	chr01_39829042_2	1	39829042	7.35e-18	HRR	Dominant	Combine	11	6	Os01g0913000	33.864
14	chr01_41107580_2	1	41107580	5.7e-10	GL	Dominant	Combine	12	7	Os01g0936100	9.441
15	chr01_41332191	1	41332191	3.04e-10	GLWR	Additive	Combine	13	8	Os01g0940000	30.598
16	chr02_1341278_2	2	1341278	3.95e-16	GL	Dominant	Combine	14	9	Os02g0125700	4.5725
17	chr02_1365786_2	2	1365786	3.62e-12	GL	Dominant	Hybrid	15	9	Os02g0125700	19.9355
18	chr02_1449147_2	2	1449147	1.72e-10	BRR	Dominant	Hybrid	16	9	Os02g0126400	58.0725
19	chr02_1449147_2	2	1449147	9.89e-14	BRR	Dominant	Combine	16	9	Os02g0126400	58.0725
20	chr02_2134282_2	2	2134282	4.85e-13	GLWR	Dominant	Combine	17	10	Os02g0137800	125.686	RGG2	Same trait	Miao[1]	heterotrimeric G protein γ subunit	Overexpression of RGG2 resulted in lower plant height and smaller grain size
21	chr02_9955975_2	2	9955975	9.92e-28	PC	Dominant	Combine	18	11	Os02g0274000	40.133
22	chr02_10195805_2	2	10195805	1.95e-12	PC	Dominant	Hybrid	19	12	Os02g0276500	35.514
23	chr02_21241110	2	21241110	2.89e-09	PGWC	Dominant	Combine	20	13	Os02g0559800	9.603
24	chr02_22142721_2	2	22142721	1.03e-16	HRR	Dominant	Combine	21	14	Os02g0576600	5.567
25	chr02_26499252_2	2	26499252	4.72e-16	AC	Dominant	Combine	22	15	Os02g0656200	7.9735
26	chr02_30532626_2	2	30532626	5.41e-09	GL	Dominant	Combine	23	16	Os02g0733300	42.731
27	chr02_34449837	2	34449837	3.59e-10	CD	Additive	Combine	24	17	Os02g0805250	94.3595
28	chr03_1109177	3	1109177	5.04e-27	CD	Additive	Hybrid	25	18	Os03g0121800	87.24
29	chr03_1696366	3	1696366	1.03e-10	MRR	Additive	Combine	26	19	Os03g0130300	18.5175
30	chr03_4236265_2	3	4236265	1.74e-17	GLWR	Dominant	Hybrid	27	20	Os03g0175800	197.34	BG1; OsRAF|OsLG3	Same trait	Liu[2],Yu[3]	Big Grain1, ERF family transcription factor; ethylene responsive and root abundant factor gene	OsLG3 positively regulates rice grain length and has no effect on grain quality
31	chr03_4236265_2	3	4236265	1.93e-28	GLWR	Dominant	Combine	27	20	Os03g0175800	197.34	BG1; OsRAF|OsLG3	Same trait	Liu[2],Yu[3]	Big Grain1, ERF family transcription factor; ethylene responsive and root abundant factor gene	OsLG3 positively regulates rice grain length and has no effect on grain quality
32	chr03_5435375_2	3	5435375	1.69e-09	GL	Dominant	Combine	28	21	Os03g0203200	12.382
33	chr03_5526607_2	3	5526607	1.48e-09	GL	Dominant	Hybrid	29	21	Os03g0205000	40.284
34	chr03_5526607_2	3	5526607	1.43e-11	GL	Dominant	Combine	29	21	Os03g0205000	40.284
35	chr03_5705695_2	3	5705695	2.39e-11	GL	Dominant	Hybrid	30	21	Os03g0209400	3.046
36	chr03_5732764_2	3	5732764	2.77e-09	GW	Dominant	Combine	31	21	Os03g0209400	24.023
37	chr03_5807687_2	3	5807687	5.8e-17	GL	Dominant	Combine	32	21	Os03g0212800	72.129
38	chr03_6268112_2	3	6268112	5.98e-09	AC	Dominant	Hybrid	33	22	Os03g0219200	5.5345
39	chr03_6268112_2	3	6268112	5.49e-13	AC	Dominant	Combine	33	22	Os03g0219200	5.5345
40	chr03_7079872	3	7079872	7.82e-11	PGWC	Additive	Combine	34	23	Os03g0232600	49.4795	TUD1|DSG1|ELF1	Related trait	Hu[4]	U-box E3 ubiquitin ligase;Taihu Dwarf1	d1 tud1-5 double mutant was similar to tud1-5 phenotype, with specific short internodes, straight leaves and short grains at the second node
41	chr03_10312385_2	3	10312385	5.69e-10	HRR	Dominant	Hybrid	35	24	Os03g0294700	22.6695
42	chr03_10312385_2	3	10312385	1.66e-19	HRR	Dominant	Combine	35	24	Os03g0294700	22.6695
43	chr03_10419035_2	3	10419035	6.43e-11	CD	Dominant	Combine	36	24	Os03g0297600	0.586
44	chr03_14500452	3	14500452	5.25e-14	AC	Additive	Combine	37	25	Os03g0369100	8.3665	OsLTPL36	Same trait	Wang[5]	lipid transfer protein	Downregulation of OsLTP36 expression resulted in a variety of seed defects, significantly reduced seed setting rate and 1000-seed weight by 23-36% and 7-19%, respectively. Osltp36-rnai strains did not differ significantly from the wild type before flowering, nor did they differ in spike number and grain number. However, seeds produced chalky endosperm, delayed embryo development, reduced fatty ac…
45	chr03_14862107	3	14862107	5.03e-14	BRR	Additive	Combine	38	26	Os03g0379300	139.013
46	chr03_16667441	3	16667441	2.16e-09	AC	Additive	Inbred	39	27	Os03g0407400	64.864	GS3	Same trait	Fan[6]	G protein gamma subunit; heterotrimeric G-protein γ subunit; major QTL for grain length and weight; THEROMOTOLERANCE 2
47	chr03_16681339_2	3	16681339	3.12e-23	GL	Dominant	Hybrid	40	27	Os03g0407400	50.966	GS3	Same trait	Fan[6]	G protein gamma subunit; heterotrimeric G-protein γ subunit; major QTL for grain length and weight; THEROMOTOLERANCE 2
48	chr03_16681339_2	3	16681339	1.81e-31	GLWR	Dominant	Hybrid	40	27	Os03g0407400	50.966	GS3	Same trait	Fan[6]	G protein gamma subunit; heterotrimeric G-protein γ subunit; major QTL for grain length and weight; THEROMOTOLERANCE 2
49	chr03_16681339_2	3	16681339	5.41e-41	GL	Dominant	Combine	40	27	Os03g0407400	50.966	GS3	Same trait	Fan[6]	G protein gamma subunit; heterotrimeric G-protein γ subunit; major QTL for grain length and weight; THEROMOTOLERANCE 2
50	chr03_16681339_2	3	16681339	2.81e-71	GLWR	Dominant	Combine	40	27	Os03g0407400	50.966	GS3	Same trait	Fan[6]	G protein gamma subunit; heterotrimeric G-protein γ subunit; major QTL for grain length and weight; THEROMOTOLERANCE 2
51	chr03_16720836	3	16720836	9.83e-17	GL	Additive	Combine	41	27	Os03g0407400	11.469	GS3	Same trait	Fan[6]	G protein gamma subunit; heterotrimeric G-protein γ subunit; major QTL for grain length and weight; THEROMOTOLERANCE 2
52	chr03_16720836	3	16720836	3.42e-15	GLWR	Additive	Combine	41	27	Os03g0407400	11.469	GS3	Same trait	Fan[6]	G protein gamma subunit; heterotrimeric G-protein γ subunit; major QTL for grain length and weight; THEROMOTOLERANCE 2
53	chr03_16721158	3	16721158	4.24e-31	GL	Additive	Inbred	42	27	Os03g0407400	11.147	GS3	Same trait	Fan[6]	G protein gamma subunit; heterotrimeric G-protein γ subunit; major QTL for grain length and weight; THEROMOTOLERANCE 2
54	chr03_16721158	3	16721158	1.92e-27	GLWR	Additive	Inbred	42	27	Os03g0407400	11.147	GS3	Same trait	Fan[6]	G protein gamma subunit; heterotrimeric G-protein γ subunit; major QTL for grain length and weight; THEROMOTOLERANCE 2
55	chr03_16736102_2	3	16736102	2.3e-09	PC	Dominant	Hybrid	43	27	Os03g0407400	3.797	GS3	Same trait	Fan[6]	G protein gamma subunit; heterotrimeric G-protein γ subunit; major QTL for grain length and weight; THEROMOTOLERANCE 2
56	chr03_21137226	3	21137226	6.34e-10	GL	Dominant	Hybrid	44	28	Os03g0576900	42.7655
57	chr03_21149736	3	21149736	7.88e-12	TD	Dominant	Hybrid	45	28	Os03g0576900	55.2755
58	chr03_21149792	3	21149792	3.71e-11	PGWC	Additive	Inbred	46	28	Os03g0576900	55.3315
59	chr03_21153546	3	21153546	5.71e-11	GW	Dominant	Combine	47	28	Os03g0576900	59.0855
60	chr03_21159816_2	3	21159816	3.77e-10	CD	Dominant	Hybrid	48	28	Os03g0578900	53.467
61	chr03_21161015	3	21161015	1.49e-09	GW	Additive	Inbred	49	28	Os03g0578900	52.268
62	chr03_21161015	3	21161015	1.75e-16	GLWR	Additive	Inbred	49	28	Os03g0578900	52.268
63	chr03_21161345	3	21161345	2.55e-09	TD	Dominant	Combine	50	28	Os03g0578900	51.938
64	chr03_21161793	3	21161793	1.87e-17	GL	Additive	Inbred	51	28	Os03g0578900	51.49
65	chr03_21162275	3	21162275	2.03e-09	PGWC	Dominant	Combine	52	28	Os03g0578900	51.008
66	chr03_21163660	3	21163660	3.23e-10	CD	Dominant	Combine	53	28	Os03g0578900	49.623
67	chr03_22331812_2	3	22331812	6.46e-13	GW	Dominant	Hybrid	54	29	Os03g0599800	50.8315
68	chr03_27958878	3	27958878	1.22e-14	BRR	Dominant	Combine	55	30	Os03g0696300	66.2985
69	chr03_29221861_2	3	29221861	1.27e-11	HRR	Dominant	Combine	56	31	Os03g0719800	49.7595
70	chr03_30508350_2	3	30508350	1.5e-17	BRR	Dominant	Hybrid	57	32	Os03g0742900	26.3455
71	chr03_30525106_2	3	30525106	9.63e-20	BRR	Dominant	Combine	58	32	Os03g0742900	43.1015
72	chr03_30609017_2	3	30609017	1.53e-10	AC	Dominant	Hybrid	59	32	Os03g0746500	75.438
73	chr04_800947_2	4	800947	1.09e-17	AC	Dominant	Combine	60	33	Os04g0115500	114.731
74	chr04_1163234	4	1163234	2.39e-13	GW	Additive	Combine	61	34
75	chr04_1164552	4	1164552	2.65e-15	GW	Additive	Inbred	62	34
76	chr04_2744361_2	4	2744361	3.84e-15	AC	Dominant	Combine	63	35
77	chr04_2747965_2	4	2747965	1e-13	AC	Dominant	Hybrid	64	35
78	chr04_4325652	4	4325652	1.27e-09	AC	Additive	Combine	65	36	Os04g0162100	42.862
79	chr04_10000005_2	4	10000005	4.21e-11	TD	Dominant	Hybrid	66	37
80	chr04_13148906_2	4	13148906	6.78e-13	PGWC	Dominant	Combine	67	38
81	chr04_16179881	4	16179881	4.14e-14	GLWR	Additive	Hybrid	68	39	Os04g0341500	24.244
82	chr04_16593878	4	16593878	5.91e-10	GW	Additive	Combine	69	40	Os04g0350700	139.659	An-1	Same trait	Luo[7]	basic helix-loop-helix protein	An-1 encodes a bHLH protein that regulates awn development, grain size and grain number in rice
83	chr04_18084852_2	4	18084852	2.68e-10	HRR	Dominant	Hybrid	70	41
84	chr04_30776382_2	4	30776382	3.06e-12	GL	Dominant	Combine	71	42	Os04g0607600	39.3505
85	chr04_31484916	4	31484916	1.55e-11	ASV	Additive	Combine	72	43	Os04g0620000	19.09
86	chr04_32348512_2	4	32348512	1.32e-18	TD	Dominant	Hybrid	73	44	Os04g0635900	3.0255
87	chr04_32348512_2	4	32348512	4.17e-14	TD	Dominant	Combine	73	44	Os04g0635900	3.0255
88	chr04_35400745	4	35400745	7.5e-20	BRR	Additive	Combine	74	45	Os04g0692000	19.5135
89	chr05_115565_2	5	115565	1.86e-17	AC	Dominant	Hybrid	75	46	Os05g0102000	1.7855
90	chr05_3753348_2	5	3753348	9.08e-15	TD	Dominant	Hybrid	76	47	Os05g0164800	56.029
91	chr05_4538529_2	5	4538529	7.24e-11	PGWC	Dominant	Hybrid	77	48	Os05g0176800	65.667
92	chr05_4538529_2	5	4538529	6.57e-18	PGWC	Dominant	Combine	77	48	Os05g0176800	65.667
93	chr05_4558811	5	4558811	2.48e-11	CD	Additive	Inbred	78	48	Os05g0176800	45.385
94	chr05_4812507_2	5	4812507	1.28e-12	AC	Dominant	Hybrid	79	49	Os05g0180600	47.4065
95	chr05_5359520_2	5	5359520	5.81e-09	PGWC	Dominant	Hybrid	80	50	Os05g0187500	6.391	GSE5、GW5	Related trait	Wan[8]	calmodulin binding protein; QTL for seed width on chromosome 5; QTL for grain width and weight on chromosome 5
96	chr05_5359783	5	5359783	7e-20	GLWR	Additive	Inbred	81	50	Os05g0187500	6.128	GSE5、GW5	Same trait	Wan[8]	calmodulin binding protein; QTL for seed width on chromosome 5; QTL for grain width and weight on chromosome 5
97	chr05_5359783	5	5359783	4.22e-15	GW	Additive	Hybrid	81	50	Os05g0187500	6.128	GSE5、GW5	Same trait	Wan[8]	calmodulin binding protein; QTL for seed width on chromosome 5; QTL for grain width and weight on chromosome 5
98	chr05_5359838	5	5359838	5.23e-20	GW	Additive	Inbred	82	50	Os05g0187500	6.073	GSE5、GW5	Same trait	Wan[8]	calmodulin binding protein; QTL for seed width on chromosome 5; QTL for grain width and weight on chromosome 5
99	chr05_5359838	5	5359838	1.12e-39	GW	Additive	Combine	82	50	Os05g0187500	6.073	GSE5、GW5	Same trait	Wan[8]	calmodulin binding protein; QTL for seed width on chromosome 5; QTL for grain width and weight on chromosome 5
100	chr05_5378301	5	5378301	1.25e-13	GLWR	Additive	Hybrid	83	50	Os05g0187500	12.39	GSE5、GW5	Same trait	Wan[8]	calmodulin binding protein; QTL for seed width on chromosome 5; QTL for grain width and weight on chromosome 5
101	chr05_5378301	5	5378301	4.29e-19	GLWR	Additive	Combine	83	50	Os05g0187500	12.39	GSE5、GW5	Same trait	Wan[8]	calmodulin binding protein; QTL for seed width on chromosome 5; QTL for grain width and weight on chromosome 5
102	chr05_5500982	5	5500982	1.12e-10	GW	Additive	Combine	84	50	Os05g0187500	135.071	GSE5、GW5	Same trait	Wan[8]	calmodulin binding protein; QTL for seed width on chromosome 5; QTL for grain width and weight on chromosome 5
103	chr05_5674671_2	5	5674671	1.19e-11	BRR	Dominant	Hybrid	85	50	Os05g0194900	140.222
104	chr05_5674671_2	5	5674671	8.22e-10	BRR	Dominant	Combine	85	50	Os05g0194900	140.222
105	chr05_23243554	5	23243554	3.8e-14	BRR	Dominant	Hybrid	86	51	Os05g0472700	25.866
106	chr05_24100534	5	24100534	2.8e-10	MRR	Dominant	Combine	87	52	Os05g0490600	12.3005
107	chr05_26310189_2	5	26310189	4.83e-09	ASV	Dominant	Combine	88	53	Os05g0529000	28.962
108	chr06_923396	6	923396	4.38e-09	PGWC	Additive	Inbred	89	54	Os06g0116800	6.565
109	chr06_1266672	6	1266672	3.96e-11	ASV	Additive	Inbred	90	55	Os06g0125800	118.121
110	chr06_1731808	6	1731808	2.62e-28	AC	Additive	Combine	91	56	Os06g0133000	36.29	Wx	Same trait	Mikami I[10]	granule-bound starch synthase; waxy gene
111	chr06_1765761	6	1765761	7.11e-24	AC	Additive	Inbred	92	56	Os06g0130400	134.119	OsACS6|SSG6	Same trait	Matsushima R[9]	substandard starch grain6; protein homologous to aminotransferase; aminocyclopropane-1-carboxylate synthase gene;
112	chr06_1765761	6	1765761	5.59e-24	AC	Additive	Hybrid	92	56	Os06g0130400	134.119	OsACS6|SSG6	Same trait	Matsushima R[9]	substandard starch grain6; protein homologous to aminotransferase; aminocyclopropane-1-carboxylate synthase gene;
113	chr06_1788519_2	6	1788519	8.47e-11	AC	Dominant	Combine	93	56	Os06g0133000	20.421	Wx	Same trait	Mikami I[10]	granule-bound starch synthase; waxy gene
114	chr06_2795609	6	2795609	4.79e-11	AC	Dominant	Combine	94	57	Os06g0154200	12.602
115	chr06_5596138	6	5596138	7.4e-11	GL	Additive	Combine	95	58	Os06g0209500	4.1305
116	chr06_7820000_2	6	7820000	2.22e-09	HRR	Dominant	Combine	96	59	Os06g0250600	17.174
117	chr06_7964672_2	6	7964672	3.56e-18	AC	Dominant	Combine	97	59	Os06g0250600	161.846
118	chr06_9665353	6	9665353	2.81e-09	MRR	Additive	Hybrid	98	60
119	chr06_15167384_2	6	15167384	9.39e-10	HRR	Dominant	Hybrid	99	61
120	chr06_15394879_2	6	15394879	2.06e-09	TD	Dominant	Hybrid	100	62	Os06g0367900	24.3275
121	chr06_18977524	6	18977524	1.91e-10	HRR	Additive	Combine	101	63	Os06g0517700	21.5215
122	chr06_24345260_2	6	24345260	3.4e-14	HRR	Dominant	Hybrid	102	64	Os06g0608700	117.025
123	chr06_28169056	6	28169056	1.73e-10	GL	Dominant	Hybrid	103	65	Os06g0677800	7.518
124	chr07_487644	7	487644	2.69e-16	GW	Additive	Combine	104	66	Os07g0108900	13.1995	OsMADS15|DEP			degenerative palea
125	chr07_493210	7	493210	4.91e-31	GLWR	Additive	Combine	105	66	Os07g0108900	18.7655	OsMADS15|DEP			degenerative palea
126	chr07_498845	7	498845	1.98e-14	GW	Additive	Hybrid	106	66	Os07g0108900	24.4005	OsMADS15|DEP			degenerative palea
127	chr07_498845	7	498845	1.62e-34	GLWR	Additive	Hybrid	106	66	Os07g0108900	24.4005	OsMADS15|DEP			degenerative palea
128	chr07_11694154	7	11694154	6.32e-16	PC	Additive	Hybrid	107	67
129	chr07_22097827_2	7	22097827	2.03e-21	AC	Dominant	Combine	108	68	Os07g0555200	21.218
130	chr07_26432329_2	7	26432329	1.59e-09	PGWC	Dominant	Combine	109	69	Os07g0636200	9.2005
131	chr07_26496762	7	26496762	1.85e-11	GLWR	Additive	Inbred	110	69	Os07g0637400	6.084
132	chr07_26967606_2	7	26967606	5.31e-09	TD	Dominant	Combine	111	70	Os07g0647200	53.7755
133	chr07_26989569_2	7	26989569	8.39e-13	CD	Dominant	Hybrid	112	70	Os07g0647200	31.8125
134	chr08_1712296_2	8	1712296	3.49e-10	AC	Dominant	Hybrid	113	71	Os08g0127100	147.94	OsHT|OsLHT1	Same trait	Guo[11]	amino acid transporter; histidine transporter; Lysine-Histidine-type Transporter 1	Oslht1 has brown leaves and spikelets, and plant height, panicle length, seed setting rate, grain number per panicle, grain number per plant and 1000-grain weight are all reduced in different degree. The contents of total nitrogen and free amino acids in Oslht1 flag leaves were similar to those of wild type (WT) at flowering stage, but significantly higher than WT at maturity stage. Oslht1 seeds …
135	chr08_4096135	8	4096135	1.13e-17	ASV	Additive	Combine	114	72	Os08g0168000	121.49
136	chr08_4353397_2	8	4353397	2.08e-13	AC	Dominant	Hybrid	115	73	Os08g0174700	6.079
137	chr08_5955301_2	8	5955301	2.59e-11	GW	Dominant	Combine	116	74	Os08g0200600	106.544
138	chr08_14411917_2	8	14411917	2.22e-13	GW	Dominant	Hybrid	117	75
139	chr08_14411917_2	8	14411917	3.63e-17	GW	Dominant	Combine	117	75
140	chr08_16359663_2	8	16359663	5.45e-12	ASV	Dominant	Combine	118	76
141	chr08_18285566_2	8	18285566	5.22e-16	TD	Dominant	Hybrid	119	77	Os08g0384100	179.75
142	chr08_18509239_2	8	18509239	4.63e-09	TD	Dominant	Hybrid	120	78
143	chr08_18649939	8	18649939	4.82e-16	MRR	Additive	Hybrid	121	78
144	chr08_20311562_2	8	20311562	2.73e-10	PC	Dominant	Combine	122	79	Os08g0422600	59.6585
145	chr08_27032115_2	8	27032115	7.15e-12	ASV	Dominant	Combine	123	80	Os08g0540400	25.0975
146	chr08_28403978_2	8	28403978	1.83e-14	HRR	Dominant	Hybrid	124	81	Os08g0566600	25.6695
147	chr09_6242433	9	6242433	1.34e-09	CD	Additive	Combine	125	82	Os09g0286400	136.514
148	chr09_6736536_2	9	6736536	3.85e-09	AC	Dominant	Hybrid	126	83	Os09g0292900	137.388
149	chr09_7511656	9	7511656	6.11e-12	GL	Additive	Hybrid	127	84	Os09g0299200	180.232
150	chr09_8663020_2	9	8663020	8.67e-23	GLWR	Dominant	Hybrid	128	85	Os09g0315100	12.9345
151	chr09_8682315_2	9	8682315	1.4e-24	GLWR	Dominant	Combine	129	85	Os09g0315100	32.2295
152	chr09_14848778_2	9	14848778	5.62e-09	GL	Dominant	Hybrid	130	86	Os09g0417600	128.185
153	chr09_19114315	9	19114315	2.97e-14	PGWC	Additive	Hybrid	131	87	Os09g0493500	2.676
154	chr09_20684062_2	9	20684062	2.84e-12	GW	Dominant	Combine	132	88	Os09g0529300	49.0945
155	chr09_22327834_2	9	22327834	4.76e-11	BRR	Dominant	Hybrid	133	89	Os09g0561600	10.5755
156	chr10_12432877_2	10	12432877	2.62e-14	AC	Dominant	Hybrid	134	90
157	chr10_12976201	10	12976201	1.25e-09	GW	Additive	Inbred	135	91	Os10g0390500	5.233	AlaAT|OsAlaAT1	Related trait	Yang[12]	alanine aminotransferase gene	The osalaAT1 mutant and OsalaAT1-Rnai lines produced white, powdery endosperm, significantly reduced amylose content in seeds, slightly decreased total starch content, slightly decreased dry weight, slightly increased protein content, and changed amylopectin structure
158	chr10_13077653_2	10	13077653	1.94e-16	GLWR	Dominant	Hybrid	136	91	Os10g0390500	106.685	AlaAT|OsAlaAT1	Related trait	Yang[12]	alanine aminotransferase gene
159	chr10_13077653_2	10	13077653	3.4e-10	GL	Dominant	Combine	136	91	Os10g0390500	106.685	AlaAT|OsAlaAT1	Related trait	Yang[12]	alanine aminotransferase gene
160	chr10_16095408_2	10	16095408	7.82e-12	HRR	Dominant	Combine	137	92	Os10g0445400	9.8245
161	chr10_16279288_2	10	16279288	8.7e-13	TD	Dominant	Hybrid	138	92	Os10g0447600	74.735
162	chr10_17129599	10	17129599	1.85e-11	MRR	Additive	Combine	139	93	Os10g0463800	15.92	FLO7	Related trait	Zhang[13]	floury endosperm7	There was no significant difference between FLO7 mutant and wild type in vegetative growth stage. After pollination, the filling ratio of FLO7 decreased significantly, resulting in an opaque endosperm, with a 13% decrease in grain weight and thickness, but no significant change in grain width and length. The outer grain of FLO7 was white and powdery, while the inner layer was translucent. The com…
163	chr10_22452009_2	10	22452009	3.23e-11	AC	Dominant	Hybrid	140	94	Os10g0565600	59.782	OsHUB2|FRRP1	Related trait	Du[14]	HISTONE MONOUBIQUITINATION2; Flowering-Related RING Protein 1; E3 ligase	FRRP1-RNAi knockdown lines flowering 23-26 days earlier, increased plant height, grain length and spike length
164	chr10_22732840_2	10	22732840	2.07e-22	GL	Dominant	Hybrid	141	95	Os10g0573000	18.8105
165	chr10_22748103_2	10	22748103	1.07e-12	GL	Dominant	Combine	142	95	Os10g0573000	3.5475
166	chr11_1628300_2	11	1628300	1.09e-12	GW	Dominant	Combine	143	96	Os11g0135000	2.4625
167	chr11_2648183_2	11	2648183	2.24e-12	GW	Dominant	Combine	144	97	Os11g0157100	85.2005	Cyclin-T1;3	Same trait	Qi[15]	rice cyclin gene	Compared with the wild-type Zhonghua 11, the grain length and 1000-grain weight of OsGRF8 overexpressed line GRF8OE increased, but grain width decreased, glume epidermis cells lengthened, and starch grains in grains increased. These phenotypes were similar to those of THE line MIM396 that down-regulated OsmiR396 by target simulation. Surprisingly, the grain size of OsGRF8 knockout lines GRF8KO co…
168	chr11_4331841	11	4331841	1.35e-17	PGWC	Additive	Hybrid	145	98	Os11g0184900	31.3105
169	chr11_4331919	11	4331919	3.36e-09	CD	Additive	Combine	146	98	Os11g0184900	31.3885
170	chr11_5083874	11	5083874	1.22e-20	GLWR	Additive	Hybrid	147	99	Os11g0199200	110.693
171	chr11_5084198_2	11	5084198	9.79e-14	GLWR	Dominant	Hybrid	148	99	Os11g0199200	111.017
172	chr11_10351960	11	10351960	1.95e-09	BRR	Additive	Combine	149	100
173	chr11_17141585_2	11	17141585	2.73e-10	PGWC	Dominant	Hybrid	150	101	Os11g0484500	76.2455
174	chr11_17141585_2	11	17141585	4.89e-16	PGWC	Dominant	Combine	150	101	Os11g0484500	76.2455
175	chr11_19584252	11	19584252	2.8e-14	GL	Additive	Hybrid	151	102	Os11g0539200	92.1615
176	chr11_20616136	11	20616136	3.3e-09	GLWR	Dominant	Hybrid	152	103	Os11g0551900	92.518	OsGRF8	Same trait	Yang[16]	growth regulating factor	Compared with the wild-type Zhonghua 11, the grain length and 1000-grain weight of OsGRF8 overexpressed line GRF8OE increased, but grain width decreased, glume epidermis cells lengthened, and starch grains in grains increased. These phenotypes were similar to those of THE line MIM396 that down-regulated OsmiR396 by target simulation. Surprisingly, the grain size of OsGRF8 knockout lines GRF8KO co…
177	chr11_20733945_2	11	20733945	1.7e-10	TD	Dominant	Hybrid	153	103	Os11g0558200	2.4525
178	chr11_21131978_2	11	21131978	5.83e-11	AC	Dominant	Combine	154	104	Os11g0562100	180.919
179	chr11_22826874_2	11	22826874	4.61e-12	BRR	Dominant	Hybrid	155	105	Os11g0595400	162.239
180	chr11_22826874_2	11	22826874	5.91e-11	BRR	Dominant	Combine	155	105	Os11g0595400	162.239
181	chr11_25507874	11	25507874	1.22e-10	PC	Dominant	Combine	156	106	Os11g0644800	94.689
182	chr11_26319249_2	11	26319249	2.12e-11	PC	Dominant	Combine	157	107	Os11g0657400	2.115
183	chr11_26391174_2	11	26391174	9.74e-10	HRR	Dominant	Hybrid	158	107	Os11g0657400	71.786
184	chr11_27108055	11	27108055	6.51e-11	GW	Additive	Inbred	159	108	Os11g0672700	73.6195
185	chr12_764503_2	12	764503	2.44e-10	BRR	Dominant	Combine	160	109	Os12g0113500	83.892
186	chr12_7202057	12	7202057	4.56e-09	MRR	Additive	Hybrid	161	110	Os12g0230200	87.6125
187	chr12_8040822_2	12	8040822	8.08e-11	GLWR	Dominant	Combine	162	111	Os12g0245100	6.7685
188	chr12_8084942_2	12	8084942	2.31e-16	GLWR	Dominant	Combine	163	111	Os12g0245100	50.8885
189	chr12_8207588_2	12	8207588	9.1e-14	GW	Dominant	Combine	164	111	Os12g0247700	32.7015
190	chr12_8848672_2	12	8848672	1.96e-11	HRR	Dominant	Hybrid	165	112	Os12g0258200	62.0265
191	chr12_8848672_2	12	8848672	4.22e-13	HRR	Dominant	Combine	165	112	Os12g0258200	62.0265
192	chr12_9931773_2	12	9931773	4.92e-09	CD	Dominant	Combine	166	113	Os12g0272800	50.741
193	chr12_11553347_2	12	11553347	2.68e-13	PC	Dominant	Combine	167	114	Os12g0293100	180.88
194	chr12_11844775_2	12	11844775	3.1e-14	AC	Dominant	Hybrid	168	115
195	chr12_13853228_2	12	13853228	8.51e-11	AC	Dominant	Hybrid	169	116	Os12g0428600	152.976
196	chr12_15102432_2	12	15102432	2.04e-14	GW	Dominant	Combine	170	117	Os12g0443800	190.205
197	chr12_15826799_2	12	15826799	3.13e-09	GL	Dominant	Hybrid	171	118	Os12g0458100	175.077
198	chr12_17044491_2	12	17044491	4.17e-16	TD	Dominant	Hybrid	172	119	Os12g0472500	54.85
199	chr12_17055352_2	12	17055352	1.23e-16	CD	Dominant	Hybrid	173	119	Os12g0472500	65.711
200	chr12_17055352_2	12	17055352	9.67e-16	CD	Dominant	Combine	173	119	Os12g0472500	65.711
201	chr12_17497758_2	12	17497758	9.08e-10	PGWC	Dominant	Combine	174	120	Os12g0478200	33.375
202	chr12_17636562	12	17636562	8.32e-11	GL	Additive	Combine	175	120	Os12g0479400	61.716
203	chr12_17955452_2	12	17955452	3.13e-14	BRR	Dominant	Hybrid	176	121	Os12g0484900	37.8925
204	chr12_17955452_2	12	17955452	6.98e-13	BRR	Dominant	Combine	176	121	Os12g0484900	37.8925
205	chr12_18009486_2	12	18009486	1.05e-10	AC	Dominant	Combine	177	121	Os12g0484900	91.9265
206	chr12_18053088_2	12	18053088	4e-15	GLWR	Dominant	Combine	178	121	Os12g0484900	135.529
207	chr12_18169815_2	12	18169815	8.31e-13	AC	Dominant	Hybrid	179	121	Os12g0488900	147.312
208	chr12_18447041_2	12	18447041	5.85e-15	AC	Dominant	Combine	180	122	Os12g0491800	72.2305
209	chr12_18837189_2	12	18837189	2.62e-11	GLWR	Dominant	Hybrid	181	123	Os12g0497300	40.386
210	chr12_18848530_2	12	18848530	2.9e-13	GW	Dominant	Combine	182	123	Os12g0497300	29.045
211	chr12_21650663_2	12	21650663	4.13e-09	PC	Dominant	Combine	183	124	Os12g0541300	2.716
212	chr12_22196819_2	12	22196819	4.72e-11	GLWR	Dominant	Hybrid	184	125	Os12g0548300	10.4225
213	chr12_22196819_2	12	22196819	8.82e-10	GLWR	Dominant	Combine	184	125	Os12g0548300	10.4225
214	chr12_22223666_2	12	22223666	6.99e-10	HRR	Dominant	Combine	185	125	Os12g0548300	37.2695
215	chr12_22437895	12	22437895	2.54e-09	ASV	Additive	Inbred	186	126	Os12g0552300	12.0205
216	chr12_22563436_2	12	22563436	2.87e-10	ASV	Dominant	Hybrid	187	126	Os12g0555000	17.972
217	chr12_22654241_2	12	22654241	2.32e-26	GLWR	Dominant	Hybrid	188	126	Os12g0555600	49.1205
218	chr12_22655358_2	12	22655358	6.89e-13	GLWR	Dominant	Combine	189	126	Os12g0555600	50.2375
219	chr12_23095490	12	23095490	9.35e-16	BRR	Dominant	Combine	190	127	Os12g0563200	1.8205
220	chr12_23099978	12	23099978	5.41e-11	CD	Dominant	Combine	191	127	Os12g0563200	2.6675
221	chr12_26456991_2	12	26456991	2.5e-18	GW	Dominant	Combine	192	128	Os12g0617900	145.655	OsPPKL3	Same trait	Zhang[17]	protein phosphatase with Kelch-like repeat domain	OsPPKL2 Protein phosphatases encoding the Kelch repeat domain play a negative regulator role in rice grain length regulation

## Sheet: Reference
N	Citation	Reference
1	Miao[1]	Miao J, Yang Z, Zhang D, et al. Mutation of RGG 2, which encodes a type B heterotrimeric G protein γ subunit, increases grain size and yield production in rice[J]. Plant Biotechnology Journal, 2019, 17(3): 650-664.
2	Liu[2]	Liu L, Tong H, Xiao Y, et al. Activation of Big Grain1 significantly improves grain size by regulating auxin transport in rice[J]. Proceedings of the National Academy of Sciences, 2015, 112(35): 11102-11107.
3	Yu[3]	Yu J, Xiong H, Zhu X, et al. OsLG3 contributing to rice grain length and yield was mined by Ho-LAMap[J]. BMC biology, 2017, 15(1): 1-18.
4	Hu[4]	Hu X, Qian Q, Xu T, et al. The U-box E3 ubiquitin ligase TUD1 functions with a heterotrimeric G α subunit to regulate brassinosteroid-mediated growth in rice[J]. PLoS genetics, 2013, 9(3): e1003391.
5	Wang[5]	Wang X, Zhou W, Lu Z, et al. A lipid transfer protein, OsLTPL36, is essential for seed development and seed quality in rice[J]. Plant Science, 2015, 239: 200-208.
6	Fan[6]	Fan C, Xing Y, Mao H, et al. GS3, a major QTL for grain length and weight and minor QTL for grain width and thickness in rice, encodes a putative transmembrane protein[J]. Theoretical and applied genetics, 2006, 112(6): 1164-1171.
7	Luo[7]	Luo J, Liu H, Zhou T, et al. An-1 encodes a basic helix-loop-helix protein that regulates awn development, grain size, and grain number in rice[J]. The Plant Cell, 2013, 25(9): 3360-3376.
8	Wan[8]	Wan X, Weng J, Zhai H, et al. Quantitative trait loci (QTL) analysis for rice grain width and fine mapping of an identified QTL allele gw-5 in a recombination hotspot region on chromosome 5[J]. Genetics, 2008, 179(4): 2239-2252.
9	Matsushima R[9]	Matsushima R, Maekawa M, Kusano M, et al. Amyloplast membrane protein SUBSTANDARD STARCH GRAIN6 controls starch grain size in rice endosperm[J]. Plant physiology, 2016, 170(3): 1445-1459.
10	Mikami I[10]	Mikami I, Aikawa M, Hirano H Y, et al. Altered tissue-specific expression at the Wx gene of the opaque mutants in rice[J]. Euphytica, 1999, 105(2): 91-97.
11	Guo[11]	Guo N, Gu M, Hu J, et al. Rice OsLHT1 functions in leaf-to-panicle nitrogen allocation for grain yield and quality[J]. Frontiers in Plant Science, 2020, 11: 1150.
12	Yang[12]	Yang J, Kim S R, Lee S K, et al. Alanine aminotransferase 1 (OsAlaAT1) plays an essential role in the regulation of starch storage in rice endosperm[J]. Plant Science, 2015, 240: 79-89.
13	Zhang[13]	Zhang L, Ren Y, Lu B, et al. FLOURY ENDOSPERM7 encodes a regulator of starch synthesis and amyloplast development essential for peripheral endosperm development in rice[J]. Journal of Experimental Botany, 2016, 67(3): 633-647.
14	Du[14]	Du Y, He W, Deng C, et al. Flowering-related RING protein 1 (FRRP1) regulates flowering time and yield potential by affecting histone H2B monoubiquitination in rice (Oryza sativa)[J]. PLoS One, 2016, 11(3): e0150458.
15	Qi[15]	Qi P, Lin Y S, Song X J, et al. The novel quantitative trait locus GL3. 1 controls rice grain size and yield by regulating Cyclin-T1; 3[J]. Cell research, 2012, 22(12): 1666-1680.
16	Yang[16]	Yang X, Zhao X, Dai Z, et al. OsmiR396/growth regulating factor modulate rice grain size through direct regulation of embryo-specific miR408[J]. Plant physiology, 2021, 186(1): 519-533.
17	Zhang[17]	Zhang X, Wang J, Huang J, et al. Rare allele of OsPPKL1 associated with grain length causes extra-large grain and a significant yield increase in rice[J]. Proceedings of the National Academy of Sciences, 2012, 109(52): 21534-21539.
